# Supplementary material for: Analysis of Insecticide Resistance-Related Genes of the Carmine Spider Mite Tetranychus cinnabarinus Based on a De Novo Assembled Transcriptome
Source: PLoS One. 2014 May 15;9(5):e94779. doi: 10.1371/journal.pone.0094779 (PMC4022505; doi:10.1371/journal.pone.0094779)
Supplement: Table S1 — The result of aligning T. cinnabarinus transcriptome with T. urticae genome CDS database. (XLSX) [file pone.0094779.s001.xlsx]

## Sheet: Table S2
Table S1 The result of aligning T. cinnabarinus transcriptome with T. urticae genome CDS database.
Query_id	Subject_id	Identity	Align_length	Miss_match	Gap	Query_start	Query_end	Subject_start	Subject_end	E_value	Score
CL100.Contig1_A	tetur21g00650	90.44	293	28	0	1	293	2268	2560	4e-99	359
CL101.Contig1_A	tetur17g01640	98.2	1447	17	1	612	2049	26	1472	0	2670
CL102.Contig1_A	tetur25g00410	96.32	163	6	0	127	289	905	743	7e-74	276
CL105.Contig1_A	tetur32g00320	99.12	1480	10	1	538	2014	162	1641	0	2827
CL106.Contig1_A	tetur37g00660	97.42	233	6	0	1	233	361	593	8e-116	414
CL107.Contig1_A	tetur11g00720	91.91	371	30	0	10	380	2222	2592	8e-141	498
CL109.Contig1_A	tetur03g04990	87.68	568	70	0	46	613	31	598	1e-162	571
CL10.Contig1_A	tetur04g00200	96.8	4095	107	6	122	4210	9067	13143	0	7067
CL110.Contig1_A	tetur01g07420	96.48	768	27	0	629	1396	1	768	0	1308
CL111.Contig1_A	tetur03g06550	99.68	3168	10	0	141	3308	1	3168	0	6201
CL112.Contig1_A	tetur03g02700	93.54	263	17	0	1	263	553	815	1e-107	387
CL113.Contig1_A	tetur02g13040	94.7	132	7	0	307	438	132	1	6e-53	206
CL114.Contig1_A	tetur08g01890	92.63	787	58	0	1	787	158	944	0	1100
CL115.Contig1_A	tetur01g15340	94.74	627	9	2	1	612	2424	1807	0	1009
CL116.Contig1_A	tetur07g04320	98.88	267	3	0	6	272	653	387	2e-143	505
CL117.Contig1_A	tetur07g00160	93.99	333	11	1	3	326	2833	3165	2e-144	509
CL118.Contig1_A	tetur21g00830	100	130	0	0	71	200	572	701	7e-69	258
CL11.Contig1_A	tetur02g08240	93.19	235	16	0	18	252	3262	3496	4e-93	339
CL12.Contig1_A	tetur20g01670	97.89	1277	27	0	364	1640	2124	848	0	2317
CL132.Contig1_A	tetur33g00350	99	2400	21	1	1770	4166	2400	1	0	4563
CL135.Contig1_A	tetur02g08240	88.21	212	22	1	38	246	6707	6918	8e-57	218
CL136.Contig1_A	tetur39g00460	98.14	485	6	1	1	482	563	1047	0	886
CL138.Contig1_A	tetur17g01640	98.2	1447	17	1	612	2049	26	1472	0	2670
CL13.Contig1_A	tetur01g13100	91.28	837	64	2	314	1147	268	1098	0	1078
CL140.Contig1_A	tetur04g00960	98.88	2404	27	0	380	2783	2404	1	0	4551
CL141.Contig1_A	tetur35g00560	92.88	267	19	0	40	306	509	243	4e-105	379
CL142.Contig1_A	tetur04g08640	87.04	108	5	1	102	200	148	41	1e-24	111
CL143.Contig1_A	tetur20g01290	93.31	1419	29	4	116	1513	2077	3450	0	2151
CL145.Contig1_A	tetur03g06930	99.77	865	2	0	239	1103	1	865	0	1699
CL147.Contig1_A	tetur16g00950	100	144	0	0	1	144	259	116	4e-77	285
CL149.Contig1_A	tetur04g02880	100	189	0	0	1	189	7212	7024	4e-104	375
CL14.Contig1_A	tetur07g01660	92.81	417	30	0	49	465	1575	1991	4e-168	589
CL151.Contig1_A	tetur09g03370	93.81	792	49	0	1	792	326	1117	0	1181
CL153.Contig1_A	tetur238g00010	92.09	253	14	2	1	247	297	45	4e-92	335
CL154.Contig1_A	tetur02g04340	98.21	726	13	0	1631	2356	5	730	0	1336
CL155.Contig1_A	tetur01g08300	97.66	1156	27	0	149	1304	1	1156	0	2077
CL156.Contig1_A	tetur20g03200	91.74	230	19	0	1	230	1061	832	4e-83	305
CL157.Contig1_A	tetur06g01540	98.02	756	15	0	110	865	1221	466	0	1380
CL159.Contig1_A	tetur46g00080	90.38	52	5	0	2	53	175	226	2e-10	63.9
CL15.Contig1_A	tetur02g14691	93.75	272	8	1	32	294	272	1	4e-115	412
CL160.Contig1_A	tetur07g00160	91.1	191	17	0	83	273	2194	2384	1e-64	244
CL161.Contig1_A	tetur24g01680	96.8	500	16	0	1	500	1267	1766	0	864
CL162.Contig1_A	tetur05g03130	96.11	1387	51	1	157	1543	1407	24	0	2317
CL163.Contig1_A	tetur07g05940	97.01	334	10	0	1	334	334	1	2e-166	583
CL164.Contig1_A	tetur22g02390	83.42	193	23	1	568	751	544	736	8e-32	137
CL166.Contig1_A	tetur21g03310	87.06	286	31	2	115	397	798	1080	6e-71	266
CL167.Contig1_A	tetur28g02610	98.74	557	7	0	355	911	974	418	0	1049
CL168.Contig1_A	tetur12g00380	97.56	861	18	1	109	969	1	858	0	1536
CL169.Contig1_A	tetur26g02280	94.95	1308	63	1	176	1483	1305	1	0	2066
CL16.Contig1_A	tetur07g00160	97.73	220	5	0	1	220	3546	3765	1e-110	396
CL170.Contig1_A	tetur06g01200	94	50	3	0	549	598	1	50	2e-13	75.8
CL171.Contig1_A	tetur11g05040	97.25	1198	33	0	65	1262	5013	3816	0	2113
CL172.Contig1_A	tetur13g04130	97.48	555	14	0	370	924	555	1	0	989
CL173.Contig1_A	tetur16g03350	95.58	181	8	0	166	346	1077	897	6e-80	295
CL176.Contig1_A	tetur02g08780	92.27	1888	143	1	1	1888	3399	1515	0	2581
CL177.Contig1_A	tetur39g00200	100	80	0	0	50	129	180	259	8e-39	159
CL178.Contig1_A	tetur05g05100	91.28	837	73	0	7	843	1	837	0	1080
CL179.Contig1_A	tetur35g00620	91.76	340	28	0	66	405	582	243	5e-127	452
CL180.Contig1_A	tetur10g01960	97.87	376	8	0	1	376	679	304	0	682
CL181.Contig1_A	tetur11g00300	99.59	243	1	0	92	334	160	402	1e-133	474
CL182.Contig1_A	tetur19g00570	93.75	112	7	0	5	116	685	796	4e-41	167
CL183.Contig1_A	tetur06g01780	95.66	715	31	0	185	899	1	715	0	1172
CL184.Contig1_A	tetur01g13110	96.46	254	9	0	51	304	86	339	4e-121	432
CL186.Contig1_A	tetur26g02250	98.84	1031	12	0	34	1064	1031	1	0	1949
CL187.Contig1_A	tetur03g00650	97.83	876	19	0	1	876	3615	4490	0	1586
CL188.Contig1_A	tetur15g02140	99.34	605	4	0	763	1367	605	1	0	1168
CL189.Contig1_A	tetur09g05350	93.99	1131	68	0	497	1627	1131	1	0	1703
CL18.Contig1_A	tetur29g01360	97.37	533	14	0	85	617	1	533	0	946
CL190.Contig1_A	tetur15g02140	98.98	1179	12	0	128	1306	1179	1	0	2242
CL191.Contig1_A	tetur07g00680	94.12	595	29	1	25	619	324	912	0	904
CL192.Contig1_A	tetur13g04130	97.48	555	14	0	290	844	555	1	0	989
CL193.Contig1_A	tetur04g03970	97.73	924	12	1	149	1072	4	918	0	1673
CL194.Contig1_A	tetur02g00520	92.98	2266	157	2	111	2375	3402	1138	0	3215
CL195.Contig1_A	tetur32g00320	99.29	1124	8	0	645	1768	518	1641	0	2165
CL196.Contig1_A	tetur07g03480	96.78	1802	34	2	1	1802	34	1811	0	3140
CL197.Contig1_A	tetur26g01660	93.23	1359	92	0	207	1565	1494	136	0	1965
CL198.Contig1_A	tetur08g08050	90.92	848	77	0	2	849	515	1362	0	1070
CL199.Contig1_A	tetur01g08300	96.33	1473	48	1	149	1621	1	1467	0	2494
CL19.Contig1_A	tetur02g08240	87.79	385	44	1	22	406	1966	2347	2e-107	387
CL1.Contig1_A	tetur11g00490	98.25	970	17	0	833	1802	747	1716	0	1788
CL1.Contig2_A	tetur11g00490	98.25	970	17	0	839	1808	747	1716	0	1788
CL1.Contig3_A	tetur11g00490	98.25	970	17	0	1016	1985	747	1716	0	1788
CL200.Contig1_A	tetur07g04570	95.08	630	19	1	34	663	1	618	0	1017
CL201.Contig1_A	tetur03g02860	84.38	461	72	0	531	991	1175	715	9e-94	343
CL202.Contig1_A	tetur06g02720	93.3	836	56	0	54	889	1	836	0	1213
CL203.Contig1_A	tetur01g14310	98.7	1464	19	0	25	1488	1464	1	0	2752
CL204.Contig1_A	tetur04g03810	98.03	355	7	0	765	1119	355	1	0	648
CL206.Contig1_A	tetur03g05790	96.08	51	2	0	1	51	4	54	2e-16	85.7
CL207.Contig1_A	tetur05g05630	94.07	236	14	0	1	236	3925	3690	1e-98	357
CL208.Contig1_A	tetur32g00970	94.88	488	25	0	510	997	1	488	0	769
CL209.Contig1_A	tetur30g01840	91.19	579	51	0	385	963	594	16	0	743
CL20.Contig1_A	tetur43g00080	97.29	663	18	0	646	1308	2530	1868	0	1172
CL211.Contig1_A	tetur02g12010	97	333	10	0	536	868	2739	2407	2e-165	581
CL212.Contig1_A	tetur21g02220	98.41	1380	4	1	555	1934	1362	1	0	2587
CL213.Contig1_A	tetur14g00210	98.37	492	8	0	241	732	492	1	0	912
CL214.Contig1_A	tetur87g00020	94.35	248	14	0	783	1030	1	248	5e-105	381
CL215.Contig1_A	tetur08g00730	100	30	0	0	113	142	1228	1257	3e-09	60
CL218.Contig1_A	tetur18g00170	99.71	690	2	0	28	717	690	1	0	1352
CL219.Contig1_A	tetur21g00520	97.58	1526	37	0	152	1677	1971	446	0	2732
CL21.Contig1_A	tetur24g00820	94.14	478	28	0	1	478	478	1	0	726
CL222.Contig1_A	tetur23g00380	88.64	722	70	4	1	719	3602	4314	0	765
CL224.Contig1_A	tetur04g03810	98.03	355	7	0	765	1119	355	1	0	648
CL225.Contig1_A	tetur14g00210	98.37	492	8	0	352	843	492	1	0	912
CL226.Contig1_A	tetur05g06430	89.37	461	49	0	7	467	461	1	5e-149	525
CL227.Contig1_A	tetur05g00060	98.51	202	3	0	12	213	561	360	1e-104	377
CL229.Contig1_A	tetur02g10710	96.9	258	8	0	242	499	1156	1413	9e-126	448
CL22.Contig1_A	tetur03g07870	93.82	2492	121	2	177	2656	1	2471	0	3764
CL240.Contig1_A	tetur05g08760	93.43	213	14	0	118	330	213	1	1e-84	311
CL241.Contig1_A	tetur03g05070	88.65	934	106	0	1	934	546	1479	0	1011
CL242.Contig1_A	tetur08g07600	98.71	310	4	0	1	310	310	1	2e-166	583
CL243.Contig1_A	tetur04g07350	96.3	135	5	0	1	135	135	1	2e-59	228
CL244.Contig1_A	tetur46g00100	83.56	438	72	0	430	867	1509	1072	4e-80	297
CL245.Contig1_A	tetur46g00100	83.56	438	72	0	440	877	1509	1072	4e-80	297
CL248.Contig1_A	tetur28g01030	84.57	311	42	1	20	330	1387	1691	1e-62	238
CL249.Contig1_A	tetur11g05000	97.07	682	20	0	21	702	682	1	0	1193
CL24.Contig1_A	tetur06g04510	97.35	756	20	0	127	882	1	756	0	1340
CL251.Contig1_A	tetur12g04610	90.76	1623	147	1	165	1787	1620	1	0	2024
CL253.Contig1_A	tetur15g00680	96.37	1268	46	0	268	1535	107	1374	0	2149
CL254.Contig1_A	tetur40g00010	94.09	829	49	0	1	829	529	1357	0	1255
CL256.Contig1_A	tetur21g00200	97.73	396	9	0	147	542	1	396	0	714
CL257.Contig1_A	tetur46g00080	89.13	184	20	0	114	297	29	212	7e-53	206
CL258.Contig1_A	tetur46g00080	90.42	167	16	0	114	280	29	195	3e-52	204
CL259.Contig1_A	tetur01g12880	96.19	1311	50	0	1	1311	1311	1	0	2202
CL25.Contig1_A	tetur05g04700	91.09	1055	92	2	214	1267	1347	294	0	1330
CL260.Contig1_A	tetur09g05750	97.64	212	5	0	472	683	973	1184	3e-105	381
CL261.Contig1_A	tetur10g04810	94.58	922	50	0	1	922	977	56	0	1431
CL262.Contig1_A	tetur10g01820	98.9	638	4	1	48	682	651	14	0	1205
CL263.Contig1_A	tetur10g02040	97.62	336	8	0	1	336	1170	835	4e-172	603
CL264.Contig1_A	tetur26g01660	92.37	1494	114	0	207	1700	1494	1	0	2058
CL265.Contig1_A	tetur01g07420	96.48	768	27	0	489	1256	1	768	0	1308
CL266.Contig1_A	tetur30g00590	88.22	908	101	2	1	905	19617	20521	0	944
CL26.Contig1_A	tetur04g02880	96.47	170	6	0	6	175	6159	5990	4e-78	289
CL27.Contig1_A	tetur11g05000	97.4	462	12	0	1	462	1012	1473	0	821
CL29.Contig1_A	tetur11g05850	98.7	3528	46	0	226	3753	1	3528	0	6629
CL2.Contig1_A	tetur25g00130	91.2	2330	118	11	644	2925	893	3183	0	3057
CL31.Contig1_A	tetur14g02290	92.05	2831	225	0	3	2833	2831	1	0	3828
CL33.Contig1_A	tetur25g00540	91.49	646	55	0	413	1058	678	33	0	844
CL34.Contig1_A	tetur19g01230	93.34	766	33	2	537	1293	1276	520	0	1130
CL35.Contig1_A	tetur02g13380	97.39	1033	27	0	824	1856	1033	1	0	1834
CL36.Contig1_A	tetur19g01230	92.45	1285	79	2	537	1812	1276	1	0	1794
CL37.Contig1_A	tetur22g02380	89.41	85	9	0	444	528	3346	3430	1e-19	97.6
CL38.Contig1_A	tetur02g07460	92.91	282	20	0	1	282	36	317	1e-111	400
CL39.Contig1_A	tetur01g04440	96.64	892	30	0	1	892	112	1003	0	1530
CL3.Contig1_A	tetur07g07940	82.13	940	144	6	110	1034	938	8	8e-147	519
CL3.Contig2_A	tetur24g02150	91.25	777	65	1	1	777	774	1	0	997
CL41.Contig1_A	tetur07g05750	96.04	278	11	0	1	278	163	440	8e-131	464
CL42.Contig1_A	tetur07g00160	97.11	761	22	0	149	909	3838	4598	0	1334
CL42.Contig2_A	tetur07g01660	97.26	694	19	0	312	1005	2729	3422	0	1225
CL43.Contig1_A	tetur60g00040	96.04	455	18	0	84	538	455	1	0	759
CL44.Contig1_A	tetur12g03320	97.19	713	20	0	356	1068	1	713	0	1255
CL45.Contig1_A	tetur30g01360	96.1	77	3	0	58	134	1	77	1e-29	129
CL46.Contig1_A	tetur07g06880	96.97	165	5	0	1	165	165	1	2e-77	287
CL47.Contig1_A	tetur17g02800	96.23	928	35	0	1	928	1648	2575	0	1562
CL47.Contig2_A	tetur17g02800	96.23	928	35	0	1	928	1648	2575	0	1562
CL48.Contig1_A	tetur11g03090	96.05	810	20	1	139	936	1	810	0	1366
CL48.Contig2_A	tetur11g03090	97.16	563	16	0	437	999	248	810	0	989
CL49.Contig1_A	tetur11g02500	97.02	503	15	0	1	503	641	139	0	878
CL4.Contig1_A	tetur09g02630	99.4	827	5	0	1	827	478	1304	0	1600
CL4.Contig2_A	tetur09g02630	93.01	1488	104	0	321	1808	448	1935	0	2125
CL50.Contig1_A	tetur04g02890	91.95	435	35	0	1	435	116	550	5e-167	585
CL51.Contig1_A	tetur22g02380	84.08	201	29	1	1202	1399	3141	3341	1e-32	141
CL52.Contig1_A	tetur46g00100	82.93	533	83	3	1	526	1277	746	2e-87	321
CL53.Contig1_A	tetur07g00160	92.71	288	15	1	5	292	4972	5253	2e-113	406
CL54.Contig1_A	tetur21g00650	91.64	287	24	0	102	388	526	812	6e-105	379
CL55.Contig1_A	tetur02g01880	99.11	1121	4	1	4173	5287	2207	3327	0	2145
CL56.Contig1_A	tetur44g00190	99.76	409	1	0	317	725	2	410	0	803
CL57.Contig1_A	tetur02g08240	90.98	244	19	1	3	246	3765	4005	4e-83	305
CL58.Contig1_A	tetur04g05720	98.15	5527	81	6	3899	9416	867	6381	0	10100
CL59.Contig1_A	tetur01g08590	97.62	1471	22	2	284	1751	1461	1	0	2644
CL5.Contig1_A	tetur07g00160	97.56	737	18	0	223	959	3862	4598	0	1318
CL5.Contig2_A	tetur07g01660	97.26	694	19	0	450	1143	2729	3422	0	1225
CL60.Contig1_A	tetur92g00010	92.59	864	55	2	5	865	4157	5014	0	1203
CL62.Contig1_A	tetur03g00120	98.53	543	8	0	184	726	543	1	0	1013
CL63.Contig1_A	tetur05g08750	97.76	312	7	0	5	316	312	1	2e-160	563
CL65.Contig1_A	tetur37g00230	94.45	559	22	2	136	688	1050	495	0	860
CL66.Contig1_A	tetur21g02640	99.38	2413	15	0	814	3226	102	2514	0	4664
CL67.Contig1_A	tetur06g01010	97.91	430	9	0	88	517	430	1	0	781
CL68.Contig1_A	tetur29g01360	97.24	579	16	0	85	663	1	579	0	1021
CL69.Contig1_A	tetur27g01400	99.13	2417	18	1	210	2626	1	2414	0	4621
CL6.Contig1_A	tetur17g00640	97.13	1675	45	1	991	2665	1672	1	0	2936
CL6.Contig2_A	tetur17g00640	97.13	1675	45	1	1988	3662	1672	1	0	2936
CL70.Contig1_A	tetur01g15310	95.76	236	10	0	23	258	2216	1981	4e-108	389
CL72.Contig1_A	tetur17g01640	98.2	1447	17	1	612	2049	26	1472	0	2670
CL73.Contig1_A	tetur03g00650	97.96	3089	51	2	1	3077	3615	6703	0	5628
CL75.Contig1_A	tetur11g01700	97.88	1983	42	0	139	2121	1983	1	0	3598
CL78.Contig1_A	tetur01g12910	97	100	3	0	163	262	100	1	1e-43	174
CL7.Contig1_A	tetur05g07970	98.34	725	12	0	5	729	3974	4698	0	1342
CL7.Contig2_A	tetur09g00260	97.12	1878	27	6	1831	3708	1941	3791	0	3289
CL7.Contig3_A	tetur09g00260	97.28	2459	40	6	1145	3600	1357	3791	0	4337
CL82.Contig1_A	tetur22g02530	97.41	501	13	0	84	584	1	501	0	890
CL83.Contig1_A	tetur24g00270	89.52	964	90	5	111	1070	957	1	0	1082
CL85.Contig1_A	tetur24g02150	90.91	385	35	0	1	385	1097	713	3e-137	486
CL86.Contig1_A	tetur02g05600	100	91	0	0	363	453	3465	3375	3e-45	180
CL88.Contig1_A	tetur17g00870	96.98	397	12	0	1	397	797	1193	0	692
CL89.Contig1_A	tetur21g00480	98.81	1925	23	0	1341	3265	3441	1517	0	3634
CL8.Contig1_A	tetur23g01220	96.72	915	18	2	1	909	1324	2232	0	1580
CL8.Contig2_A	tetur23g01210	98.95	1052	11	0	1	1052	1300	2351	0	1998
CL8.Contig3_A	tetur23g01210	98.95	1052	11	0	1	1052	1300	2351	0	1998
CL8.Contig4_A	tetur23g01220	96.76	926	30	0	1	926	3010	3935	0	1598
CL8.Contig5_A	tetur23g01220	97.1	930	27	0	1	930	3010	3939	0	1629
CL8.Contig6_A	tetur23g01220	96.72	915	18	2	1	909	1324	2232	0	1580
CL96.Contig1_A	tetur01g03420	92.62	1166	86	0	240	1405	110	1275	0	1629
CL99.Contig1_A	tetur02g08240	88.24	255	30	0	1	255	9310	9056	9e-72	268
CL9.Contig1_A	tetur15g03100	98.65	961	13	0	436	1396	3489	2529	0	1802
Unigene10000_A	tetur24g01930	97.94	3009	62	0	252	3260	1	3009	0	5473
Unigene10001_A	tetur01g01500	95.35	516	24	0	170	685	516	1	0	833
Unigene10002_A	tetur01g01500	96.32	570	21	0	112	681	570	1	0	963
Unigene10003_A	tetur01g01500	93.94	561	34	0	100	660	561	1	0	842
Unigene10004_A	tetur08g02360	99.53	1710	8	0	2026	3735	3151	4860	0	3326
Unigene10005_A	tetur08g02360	99.53	1710	8	0	1996	3705	3151	4860	0	3326
Unigene10006_A	tetur08g02360	99.57	1171	5	0	2400	3570	3690	4860	0	2282
Unigene10007_A	tetur08g02360	99.57	1171	5	0	2370	3540	3690	4860	0	2282
Unigene10008_A	tetur02g04160	98.71	778	10	0	1879	2656	796	1573	0	1463
Unigene10009_A	tetur02g04160	98.71	778	10	0	1849	2626	796	1573	0	1463
Unigene10010_A	tetur01g14700	99.17	363	3	0	99	461	1	363	0	696
Unigene10011_A	tetur07g02020	99.25	3189	21	1	98	3283	1	3189	0	6127
Unigene10012_A	tetur31g01760	99.15	469	4	0	168	636	1	469	0	898
Unigene10013_A	tetur33g01500	99.67	306	1	0	93	398	306	1	3e-171	599
Unigene10014_A	tetur29g01600	100	579	0	0	134	712	1	579	0	1148
Unigene10015_A	tetur18g02380	99.65	1140	4	0	1	1140	1140	1	0	2228
Unigene10016_A	tetur05g09170	99.51	821	0	1	139	959	1	817	0	1594
Unigene10017_A	tetur05g07800	100	276	0	0	791	1066	2943	2668	3e-155	547
Unigene10018_A	tetur04g06460	98.63	804	11	0	94	897	804	1	0	1507
Unigene10019_A	tetur01g01480	99.22	1536	12	0	268	1803	1536	1	0	2950
Unigene10020_A	tetur15g03010	98.26	4530	61	2	130	4647	12531	8008	0	8369
Unigene10021_A	tetur11g04210	98.58	633	9	0	27	659	633	1	0	1183
Unigene10022_A	tetur08g02650	99.31	145	1	0	1	145	111	255	5e-75	280
Unigene10023_A	tetur03g00640	99.11	564	5	0	128	691	564	1	0	1078
Unigene10024_A	tetur01g04460	99.39	489	3	0	125	613	1	489	0	946
Unigene10025_A	tetur14g01780	99.78	456	1	0	184	639	456	1	0	896
Unigene10027_A	tetur19g02170	100	534	0	0	182	715	534	1	0	1059
Unigene10028_A	tetur03g09300	98.76	7749	96	0	146	7894	1	7749	0	14600
Unigene10029_A	tetur02g06280	95.2	750	36	0	168	917	28	777	0	1201
Unigene10030_A	tetur21g01730	98.93	280	3	0	1	280	2832	3111	2e-150	531
Unigene10031_A	tetur01g14080	99.3	6439	45	0	501	6939	1	6439	0	12400
Unigene10032_A	tetur01g14080	99.34	6924	46	0	501	7424	1	6924	0	13400
Unigene10033_A	tetur01g14080	99.3	6439	45	0	155	6593	1	6439	0	12400
Unigene10034_A	tetur01g14080	99.34	6924	46	0	155	7078	1	6924	0	13400
Unigene10035_A	tetur01g14080	99.79	486	1	0	191	676	6439	6924	0	955
Unigene10037_A	tetur09g05150	98.51	2412	36	0	197	2608	2412	1	0	4496
Unigene10039_A	tetur08g03180	99.58	2127	9	0	271	2397	1	2127	0	4145
Unigene1003_A	tetur17g03390	93.95	248	15	0	1	248	640	393	2e-103	373
Unigene10040_A	tetur02g08240	98	1452	29	0	167	1618	9526	10977	0	2648
Unigene10041_A	tetur19g01870	97.95	584	6	1	156	733	1	584	0	1065
Unigene10042_A	tetur13g04180	99.54	216	1	0	337	552	216	1	3e-117	420
Unigene10043_A	tetur13g04180	99.17	120	1	0	337	456	216	97	5e-60	230
Unigene10044_A	tetur18g02400	97.69	2470	57	0	1338	3807	1386	3855	0	4444
Unigene10046_A	tetur22g00140	99.74	384	1	0	70	453	1	384	0	753
Unigene10047_A	tetur19g01110	98.74	1110	14	0	133	1242	1110	1	0	2089
Unigene10048_A	tetur36g01110	95.91	489	11	2	244	723	489	1	0	809
Unigene10049_A	tetur09g03330	99.29	561	4	0	111	671	1	561	0	1080
Unigene1004_A	tetur03g01500	98.92	369	4	0	1	369	1775	2143	0	700
Unigene10050_A	tetur04g06580	99.49	396	2	0	1	396	43	438	0	769
Unigene10051_A	tetur13g04330	91.67	60	5	0	1661	1720	1069	1128	4e-14	79.8
Unigene10052_A	tetur28g02420	99.36	156	1	0	138	293	1	156	9e-82	301
Unigene10053_A	tetur09g05360	98.76	1131	14	0	340	1470	1131	1	0	2131
Unigene10054_A	tetur09g05360	98.76	1131	14	0	272	1402	1131	1	0	2131
Unigene10055_A	tetur10g05080	99.26	678	5	0	502	1179	678	1	0	1304
Unigene10056_A	tetur04g00650	99.04	726	7	0	145	870	1	726	0	1384
Unigene10057_A	tetur06g00230	96.83	1011	20	1	73	1083	1	999	0	1764
Unigene10058_A	tetur05g08480	98.52	675	10	0	248	922	1	675	0	1259
Unigene10059_A	tetur24g01890	99.68	633	2	0	60	692	633	1	0	1239
Unigene1005_A	tetur03g06180	99.14	464	4	0	47	510	2949	2486	0	888
Unigene10060_A	tetur31g00160	99.47	567	3	0	125	691	567	1	0	1100
Unigene10061_A	tetur04g00810	95.36	582	27	0	6	587	582	1	0	940
Unigene10062_A	tetur05g07800	99.25	2675	20	0	1	2675	2675	1	0	5144
Unigene10063_A	tetur23g02451	98.85	2171	25	0	1797	3967	2171	1	0	4105
Unigene10064_A	tetur08g03310	100	660	0	0	144	803	660	1	0	1308
Unigene10065_A	tetur13g01910	93.84	763	47	0	167	929	30	792	0	1140
Unigene10066_A	tetur41g00590	99.21	756	6	0	372	1127	756	1	0	1451
Unigene10067_A	tetur17g01040	98.94	1232	11	2	298	1529	1230	1	0	2323
Unigene10068_A	tetur17g01040	98.94	1232	11	2	281	1512	1230	1	0	2323
Unigene10069_A	tetur17g03340	91.27	1123	96	2	145	1266	1122	1	0	1433
Unigene1006_A	tetur34g00970	100	274	0	0	47	320	5520	5247	2e-154	543
Unigene10071_A	tetur09g04630	93.89	573	35	0	299	871	573	1	0	858
Unigene10072_A	tetur14g00870	97.46	630	16	0	1000	1629	1	630	0	1122
Unigene10073_A	tetur08g00430	98.53	612	9	0	81	692	612	1	0	1142
Unigene10074_A	tetur08g02610	99.13	231	2	0	316	546	1	231	1e-123	442
Unigene10075_A	tetur08g04460	99.24	786	6	0	201	986	786	1	0	1511
Unigene10076_A	tetur06g03090	95.38	433	20	0	1	433	55	487	0	700
Unigene10077_A	tetur06g03090	91.77	243	20	0	142	384	245	487	4e-88	323
Unigene10078_A	tetur31g01610	98.62	651	9	0	503	1153	651	1	0	1219
Unigene10079_A	tetur07g00750	92.11	190	12	1	240	426	228	39	3e-67	254
Unigene1007_A	tetur11g03810	99.58	716	3	0	1	716	476	1191	0	1396
Unigene10080_A	tetur06g04880	94.37	213	12	0	1	213	542	754	9e-90	327
Unigene10081_A	tetur21g02840	99.37	1260	2	1	81	1340	1254	1	0	2436
Unigene10082_A	tetur17g00600	98.68	1971	14	1	815	2773	1	1971	0	3715
Unigene10083_A	tetur27g00800	99.63	1896	7	0	239	2134	1896	1	0	3703
Unigene10084_A	tetur01g07020	99.71	348	1	0	82	429	1	348	0	682
Unigene10085_A	tetur27g00090	98.4	1002	10	1	281	1276	1002	1	0	1861
Unigene10086_A	tetur19g00240	98.61	503	7	0	633	1135	503	1	0	942
Unigene10087_A	tetur27g00090	98.31	650	5	1	532	1175	650	1	0	1203
Unigene10088_A	tetur19g00240	98.83	855	10	0	180	1034	855	1	0	1616
Unigene10089_A	tetur21g00740	98.99	4836	19	4	157	4971	67	4893	0	9218
Unigene1008_A	tetur16g02080	99.49	392	2	0	33	424	2178	1787	0	761
Unigene10090_A	tetur21g00740	99.03	4757	19	3	105	4840	143	4893	0	9089
Unigene10091_A	tetur01g13550	99.21	633	5	0	305	937	633	1	0	1215
Unigene10092_A	tetur02g00710	98.83	2386	16	1	342	2715	207	2592	0	4522
Unigene10093_A	tetur02g00710	98.84	2592	18	1	14	2593	1	2592	0	4914
Unigene10094_A	tetur11g01820	98.89	1170	13	0	153	1322	1	1170	0	2216
Unigene10095_A	tetur11g01820	99.05	421	4	0	80	500	750	1170	0	803
Unigene10096_A	tetur06g01640	97.83	552	12	0	86	637	1	552	0	999
Unigene10097_A	tetur13g04070	99.32	293	2	0	1	293	293	1	9e-161	565
Unigene10098_A	tetur02g10330	98.23	453	8	0	110	562	1	453	0	835
Unigene10099_A	tetur11g01660	99.2	249	2	0	95	343	249	1	9e-135	478
Unigene1009_A	tetur12g02220	97.67	43	1	0	216	258	1	43	2e-14	77.8
Unigene10100_A	tetur04g07780	98.32	238	4	0	1	238	1067	1304	1e-123	440
Unigene10102_A	tetur03g09480	99.67	303	1	0	1	303	303	1	1e-169	593
Unigene10103_A	tetur04g05160	99.13	804	7	0	107	910	1	804	0	1538
Unigene10104_A	tetur10g00100	97.33	375	10	0	131	505	375	1	0	664
Unigene10105_A	tetur23g01550	100	279	0	0	82	360	279	1	2e-157	553
Unigene10106_A	tetur37g00810	99.33	597	4	0	189	785	1	597	0	1152
Unigene10107_A	tetur08g00220	98.63	2124	29	0	189	2312	1	2124	0	3981
Unigene10108_A	tetur17g00480	97.73	660	15	0	330	989	660	1	0	1189
Unigene10109_A	tetur03g08350	98.37	734	12	0	98	831	1287	554	0	1360
Unigene1010_A	tetur08g00030	99.44	718	4	0	170	887	1	718	0	1392
Unigene10110_A	tetur03g08350	98.29	1287	22	0	98	1384	1287	1	0	2377
Unigene10111_A	tetur03g08350	98.2	556	10	0	327	882	556	1	0	1023
Unigene10112_A	tetur03g08350	98.12	638	12	0	141	778	638	1	0	1170
Unigene10113_A	tetur07g05340	95.97	372	15	0	211	582	372	1	7e-177	618
Unigene10114_A	tetur25g00240	92.78	97	6	1	327	422	1400	1304	9e-30	129
Unigene10115_A	tetur07g02920	99.61	255	1	0	56	310	1	255	7e-141	498
Unigene10117_A	tetur08g02830	97.92	3990	83	0	146	4135	3990	1	0	7251
Unigene10118_A	tetur08g02830	97.62	3066	73	0	478	3543	3066	1	0	5499
Unigene10119_A	tetur32g02020	99.43	1569	9	0	143	1711	1	1569	0	3039
Unigene1011_A	tetur01g02070	98.2	222	4	0	1	222	222	1	9e-114	408
Unigene10120_A	tetur07g01650	98.39	498	8	0	124	621	1	498	0	924
Unigene10121_A	tetur06g05820	98.76	402	5	0	423	824	402	1	0	757
Unigene10122_A	tetur31g00990	98.5	399	6	0	111	509	399	1	0	743
Unigene10123_A	tetur95g00090	91.25	160	14	0	128	287	515	356	3e-53	206
Unigene10124_A	tetur40g00391	94.3	228	13	0	9	236	376	149	3e-96	349
Unigene10125_A	tetur40g00391	95.91	171	7	0	1	171	171	1	1e-76	283
Unigene10126_A	tetur28g00990	97.32	1043	28	0	1	1043	1043	1	0	1846
Unigene10127_A	tetur01g07620	98.97	3119	17	2	1	3104	2549	5667	0	5939
Unigene10128_A	tetur01g07620	98.97	3119	17	2	1	3104	2549	5667	0	5939
Unigene10129_A	tetur27g00100	99.07	2353	22	0	90	2442	1	2353	0	4490
Unigene1012_A	tetur04g04480	99	201	2	0	218	418	201	1	4e-106	383
Unigene10130_A	tetur27g00100	99.07	2353	22	0	90	2442	1	2353	0	4490
Unigene10131_A	tetur01g07620	100	291	0	0	83	373	10225	10515	1e-164	577
Unigene10132_A	tetur15g02930	95.74	611	26	0	84	694	1	611	0	1005
Unigene10133_A	tetur34g00930	99.89	876	1	0	81	956	1	876	0	1729
Unigene10134_A	tetur15g02930	98.7	846	11	0	84	929	1	846	0	1590
Unigene10135_A	tetur34g00930	99.8	498	1	0	81	578	1	498	0	979
Unigene10136_A	tetur04g06070	98.77	651	8	0	191	841	651	1	0	1227
Unigene10137_A	tetur23g00890	95.36	884	41	0	3	886	884	1	0	1427
Unigene10138_A	tetur27g00040	99.48	2127	11	0	153	2279	1	2127	0	4129
Unigene10139_A	tetur20g02240	96.41	2703	97	0	137	2839	2703	1	0	4589
Unigene1013_A	tetur09g02570	100	25	0	0	1	25	2799	2775	5e-06	50.1
Unigene10140_A	tetur12g00730	99.44	1074	6	0	173	1246	1	1074	0	2081
Unigene10141_A	tetur04g07370	99.17	2403	20	0	47	2449	4251	1849	0	4605
Unigene10142_A	tetur01g03940	98.83	426	5	0	1	426	816	391	0	805
Unigene10143_A	tetur08g03750	87.3	63	8	0	629	691	31	93	4e-09	61.9
Unigene10144_A	tetur32g00430	98.43	573	6	1	79	651	1	570	0	1061
Unigene10145_A	tetur32g00430	98.13	482	6	1	66	547	92	570	0	880
Unigene10146_A	tetur26g02380	97.92	1344	28	0	95	1438	1	1344	0	2442
Unigene10147_A	tetur16g02370	100	58	0	0	217	274	255	198	9e-26	115
Unigene10148_A	tetur21g02530	98.66	449	6	0	99	547	1	449	0	842
Unigene10149_A	tetur21g02530	99.12	453	4	0	99	551	1	453	0	866
Unigene1014_A	tetur10g01540	97.3	259	7	0	308	566	1	259	1e-128	458
Unigene10150_A	tetur09g03250	99.17	606	5	0	96	701	1	606	0	1162
Unigene10151_A	tetur21g01870	99.69	636	2	0	818	1453	636	1	0	1245
Unigene10152_A	tetur21g01870	99.67	305	1	0	1113	1417	305	1	5e-170	597
Unigene10153_A	tetur02g03270	96.28	834	31	0	86	919	1	834	0	1407
Unigene10155_A	tetur02g00660	99.21	1656	13	0	138	1793	1656	1	0	3180
Unigene10156_A	tetur12g01860	98.69	993	13	0	75	1067	1	993	0	1865
Unigene10157_A	tetur30g01870	84.53	685	103	1	288	972	709	28	4e-145	513
Unigene10158_A	tetur01g11270	97.53	1579	39	0	2	1580	1579	1	0	2821
Unigene10159_A	tetur27g01750	98.99	396	4	0	681	1076	396	1	0	753
Unigene1015_A	tetur04g03140	98.95	381	4	0	1	381	530	150	0	724
Unigene10161_A	tetur39g00570	98.88	978	11	0	277	1254	978	1	0	1852
Unigene10162_A	tetur04g04780	99.54	869	4	0	442	1310	869	1	0	1691
Unigene10163_A	tetur20g01710	99.63	537	2	0	172	708	1	537	0	1049
Unigene10164_A	tetur04g00750	98.86	1223	14	0	217	1439	1223	1	0	2313
Unigene10165_A	tetur33g01260	96.03	378	15	0	5	382	1105	1482	1e-180	630
Unigene10166_A	tetur33g01260	96.03	378	15	0	5	382	1105	1482	1e-180	630
Unigene10167_A	tetur41g00280	99.31	2764	16	1	184	2944	6480	3717	0	5325
Unigene10168_A	tetur41g00280	99.35	2935	16	1	184	3115	6480	3546	0	5664
Unigene10169_A	tetur07g06500	99.08	327	3	0	335	661	327	1	1e-178	624
Unigene1016_A	tetur01g14520	100	170	0	0	158	327	357	188	2e-92	337
Unigene10170_A	tetur32g00990	91.72	471	33	1	93	563	1	465	3e-179	626
Unigene10171_A	tetur10g03010	98.48	1443	22	0	180	1622	1443	1	0	2686
Unigene10172_A	tetur02g12320	98.5	534	8	0	99	632	1	534	0	995
Unigene10173_A	tetur43g00440	97.33	1049	19	1	383	1422	1049	1	0	1865
Unigene10174_A	tetur18g00890	99.09	3645	30	1	152	3793	3645	1	0	6960
Unigene10175_A	tetur01g12780	96.12	824	8	2	45	856	812	1	0	1407
Unigene10176_A	tetur18g01720	99.32	2044	14	0	1	2044	2291	4334	0	3941
Unigene10177_A	tetur35g01200	99.8	1487	3	0	146	1632	1	1487	0	2924
Unigene10178_A	tetur35g01200	99.81	1587	3	0	146	1732	1	1587	0	3122
Unigene10179_A	tetur14g00340	99.4	335	2	0	189	523	1	335	0	648
Unigene1017_A	tetur07g03860	97.32	969	26	0	48	1016	1	969	0	1715
Unigene10180_A	tetur12g03240	99.09	4822	44	0	129	4950	1	4822	0	9210
Unigene10181_A	tetur20g01520	99.72	1053	3	0	325	1377	1053	1	0	2064
Unigene10182_A	tetur29g01460	99.43	1938	11	0	501	2438	1938	1	0	3755
Unigene10184_A	tetur02g00870	98.98	5077	52	0	114	5190	1062	6138	0	9652
Unigene10185_A	tetur02g00870	97.99	1047	21	0	118	1164	16	1062	0	1909
Unigene10186_A	tetur27g01540	99.46	2404	13	0	293	2696	1	2404	0	4662
Unigene10187_A	tetur27g01540	99.48	2685	14	0	293	2977	1	2685	0	5212
Unigene10188_A	tetur27g01540	99.46	2404	13	0	293	2696	1	2404	0	4662
Unigene10189_A	tetur27g01540	99.48	2685	14	0	293	2977	1	2685	0	5212
Unigene10190_A	tetur27g01530	98.72	1014	7	1	354	1361	1014	1	0	1909
Unigene10191_A	tetur27g01540	99.09	110	1	0	93	202	2576	2685	5e-54	210
Unigene10192_A	tetur36g00510	89.14	930	96	3	111	1036	38	966	0	1023
Unigene10193_A	tetur36g00510	96.17	966	37	0	45	1010	1	966	0	1622
Unigene10194_A	tetur22g02130	95.68	486	21	0	97	582	1	486	0	797
Unigene10195_A	tetur22g02120	96.06	482	19	0	94	575	1	482	0	805
Unigene10196_A	tetur18g02070	96.54	231	8	0	1090	1320	931	1161	3e-109	394
Unigene10197_A	tetur06g00520	96.31	1002	13	4	70	1047	1	1002	0	1701
Unigene10198_A	tetur02g05420	98.14	1452	27	0	523	1974	1	1452	0	2664
Unigene10199_A	tetur20g02660	96.08	919	21	2	564	1470	6	921	0	1546
Unigene1019_A	tetur20g01910	98.9	182	2	0	202	383	1	182	1e-94	345
Unigene10200_A	tetur20g02650	97.99	993	19	1	127	1118	1	993	0	1802
Unigene10201_A	tetur27g02500	98.5	1002	15	0	459	1460	1	1002	0	1867
Unigene10202_A	tetur32g01210	99.54	432	2	0	326	757	1	432	0	841
Unigene10203_A	tetur12g03900	92.59	715	45	2	129	836	714	1	0	993
Unigene10204_A	tetur02g11390	97.64	890	21	0	145	1034	890	1	0	1598
Unigene10205_A	tetur02g11530	93.56	901	58	0	117	1017	959	59	0	1326
Unigene10206_A	tetur02g11530	94.92	905	46	0	104	1008	963	59	0	1429
Unigene10207_A	tetur40g00391	94.54	238	13	0	91	328	543	780	6e-102	369
Unigene10208_A	tetur02g13280	99.52	3098	12	1	188	3282	3912	815	0	6018
Unigene10209_A	tetur10g00310	98.24	1250	22	0	27	1276	1	1250	0	2303
Unigene1020_A	tetur02g06220	97.38	381	10	0	27	407	1215	835	0	676
Unigene10210_A	tetur07g05460	98.78	1962	24	0	218	2179	1	1962	0	3699
Unigene10211_A	tetur02g02120	98.91	1290	14	0	116	1405	1	1290	0	2446
Unigene10212_A	tetur14g03250	85.52	221	32	0	219	439	322	102	3e-46	184
Unigene10213_A	tetur14g03110	90.84	131	12	0	365	495	179	49	3e-40	165
Unigene10214_A	tetur14g03240	89.42	359	32	2	197	549	363	5	6e-112	402
Unigene10215_A	tetur14g03110	85.14	296	40	1	235	526	345	50	8e-62	236
Unigene10216_A	tetur20g01360	96.67	720	24	0	88	807	1	720	0	1237
Unigene10217_A	tetur01g09400	98.73	316	4	0	175	490	3864	3549	6e-170	595
Unigene10218_A	tetur15g03010	99.03	7630	74	0	530	8159	7630	1	0	14500
Unigene10219_A	tetur13g01660	90.96	1538	106	4	115	1643	1	1514	0	1972
Unigene10220_A	tetur09g01740	96.12	206	8	0	617	822	257	462	2e-94	345
Unigene10221_A	tetur09g01740	96.12	206	8	0	522	727	257	462	2e-94	345
Unigene10222_A	tetur13g01870	97.14	105	3	0	115	219	1	105	3e-46	184
Unigene10223_A	tetur13g01210	96.77	31	1	0	399	429	346	376	7e-07	54
Unigene10226_A	tetur10g00480	100	96	0	0	345	440	96	1	7e-48	190
Unigene10227_A	tetur17g02330	99.52	831	4	0	674	1504	1	831	0	1616
Unigene10228_A	tetur27g02300	98.63	291	4	0	146	436	1	291	7e-155	545
Unigene10229_A	tetur22g01990	99.62	1329	5	0	24	1352	1329	1	0	2595
Unigene1022_A	tetur24g00540	97.33	225	6	0	7	231	414	638	9e-111	398
Unigene10230_A	tetur18g02740	99.44	357	2	0	314	670	418	62	0	692
Unigene10231_A	tetur18g02740	99.52	421	2	0	202	622	482	62	0	819
Unigene10232_A	tetur05g07840	100	570	0	0	285	854	570	1	0	1130
Unigene10233_A	tetur08g00210	98.85	609	7	0	235	843	609	1	0	1152
Unigene10234_A	tetur09g03230	99.44	711	4	0	124	834	711	1	0	1378
Unigene10235_A	tetur18g00610	98.84	2582	21	2	1	2579	89	2664	0	4879
Unigene10236_A	tetur18g00610	99.39	1813	11	0	97	1909	852	2664	0	3507
Unigene10237_A	tetur11g06050	98.3	883	15	0	540	1422	33	915	0	1631
Unigene10238_A	tetur11g06050	98.36	915	15	0	87	1001	1	915	0	1695
Unigene10239_A	tetur03g02150	100	480	0	0	114	593	244	723	0	952
Unigene1023_A	tetur05g07010	99.27	137	1	0	86	222	1	137	3e-70	264
Unigene10240_A	tetur03g02150	100	54	0	0	119	172	670	723	4e-23	107
Unigene10241_A	tetur22g02630	99.59	732	3	0	107	838	732	1	0	1427
Unigene10242_A	tetur30g00780	98.03	558	11	0	110	667	558	1	0	1019
Unigene10243_A	tetur37g00330	98.72	1881	21	1	37	1914	1881	1	0	3535
Unigene10244_A	tetur02g02330	97.96	783	16	0	134	916	783	1	0	1425
Unigene10245_A	tetur11g04180	98.62	2385	30	1	339	2723	1	2382	0	4462
Unigene10246_A	tetur02g01110	99.69	1270	4	0	115	1384	1	1270	0	2486
Unigene10247_A	tetur12g04280	99.93	1431	1	0	105	1535	1	1431	0	2829
Unigene10249_A	tetur37g00450	99.62	2102	8	0	167	2268	1	2102	0	4103
Unigene1024_A	tetur23g00910	98.31	1420	9	1	77	1496	1534	130	0	2644
Unigene10250_A	tetur13g01720	98.74	1266	16	0	166	1431	1	1266	0	2383
Unigene10251_A	tetur37g00460	98.53	68	1	0	245	312	1	68	3e-29	127
Unigene10253_A	tetur05g02930	99.76	843	2	0	142	984	1	843	0	1655
Unigene10254_A	tetur02g11540	97.32	634	17	0	84	717	30	663	0	1122
Unigene10255_A	tetur02g15091	99.16	594	5	0	1	594	265	858	0	1138
Unigene10256_A	tetur02g12070	91.46	246	6	2	477	707	190	435	2e-90	331
Unigene10257_A	tetur02g12070	93.47	444	5	3	90	518	1	435	0	668
Unigene10258_A	tetur02g12070	99.09	220	2	0	1	220	216	435	9e-118	420
Unigene10259_A	tetur14g02900	98.67	450	6	0	125	574	1	450	0	844
Unigene1025_A	tetur23g00910	96.96	593	3	1	58	650	707	130	0	1053
Unigene10260_A	tetur08g00700	98.53	1357	20	0	1	1357	678	2034	0	2531
Unigene10261_A	tetur02g07340	98.42	2279	36	0	1100	3378	513	2791	0	4232
Unigene10262_A	tetur02g07340	97.72	2766	63	0	385	3150	26	2791	0	4984
Unigene10263_A	tetur30g01690	90.5	1452	108	3	192	1625	1	1440	0	1814
Unigene10264_A	tetur03g01090	99.39	822	5	0	1490	2311	822	1	0	1590
Unigene10265_A	tetur14g03960	98	150	3	0	136	285	1	150	3e-73	274
Unigene10266_A	tetur21g00840	98.15	216	1	1	306	518	216	1	6e-109	392
Unigene10267_A	tetur16g01440	98.86	966	11	0	132	1097	966	1	0	1828
Unigene10268_A	tetur224g00010	98.42	632	10	0	240	871	2016	1385	0	1174
Unigene10269_A	tetur28g01550	99.59	985	4	0	194	1178	51	1035	0	1921
Unigene1026_A	tetur23g00910	99.31	289	2	0	77	365	1534	1246	1e-158	557
Unigene10270_A	tetur04g03020	97.87	375	8	0	271	645	375	1	0	680
Unigene10271_A	tetur10g01960	96.54	318	11	0	1	318	318	1	2e-154	543
Unigene10272_A	tetur03g03160	97.38	1372	27	2	193	1564	51	1413	0	2432
Unigene10273_A	tetur49g00070	99.32	1173	8	0	136	1308	1173	1	0	2262
Unigene10274_A	tetur32g00040	99.22	896	7	0	635	1530	152	1047	0	1721
Unigene10275_A	tetur32g00040	99.14	1047	9	0	174	1220	1	1047	0	2004
Unigene10276_A	tetur32g00040	99.22	893	7	0	100	992	155	1047	0	1715
Unigene10278_A	tetur02g12310	97.4	960	25	0	370	1329	960	1	0	1705
Unigene10279_A	tetur08g03660	98.26	1089	16	1	179	1267	1	1086	0	2004
Unigene1027_A	tetur23g00910	99.06	106	1	0	77	182	1534	1429	5e-52	202
Unigene10280_A	tetur07g00160	97.91	1482	19	2	124	1596	1	1479	0	2696
Unigene10281_A	tetur07g00160	96.49	1482	22	3	124	1578	1	1479	0	2555
Unigene10282_A	tetur07g01680	99.41	2037	12	0	1796	3832	658	2694	0	3943
Unigene10283_A	tetur07g01680	99.37	1424	9	0	1796	3219	658	2081	0	2752
Unigene10284_A	tetur10g02960	97.81	1232	27	0	138	1369	1	1232	0	2228
Unigene10285_A	tetur10g02960	97.81	1232	27	0	137	1368	1	1232	0	2228
Unigene10286_A	tetur10g02960	97.81	1232	27	0	138	1369	1	1232	0	2228
Unigene10287_A	tetur10g02960	97.81	1232	27	0	137	1368	1	1232	0	2228
Unigene10288_A	tetur04g08530	99.5	1206	6	0	186	1391	1	1206	0	2343
Unigene10289_A	tetur40g00392	96.49	740	23	1	117	856	17	753	0	1257
Unigene1028_A	tetur09g02100	99.32	878	6	0	55	932	1125	248	0	1693
Unigene10290_A	tetur21g01110	98.96	579	6	0	316	894	1	579	0	1100
Unigene10291_A	tetur02g01710	99.29	141	1	0	1	141	141	1	1e-72	272
Unigene10292_A	tetur04g03440	98.22	2922	34	4	164	3079	2910	1	0	5376
Unigene10293_A	tetur04g03440	98.22	2922	34	4	143	3058	2910	1	0	5376
Unigene10294_A	tetur04g07230	99.87	1578	2	0	139	1716	1	1578	0	3112
Unigene10295_A	tetur04g07230	100	258	0	0	403	660	1321	1578	1e-144	511
Unigene10296_A	tetur33g01210	99.74	1143	0	1	313	1455	1	1140	0	2238
Unigene10297_A	tetur29g00820	94.12	1565	86	1	1	1565	131	1689	0	2375
Unigene10298_A	tetur02g08180	97.46	1101	1	3	919	2013	1080	1	0	1984
Unigene10299_A	tetur02g08180	91.35	1041	69	1	919	1959	1080	61	0	1382
Unigene10300_A	tetur02g08180	97.46	1101	1	3	664	1758	1080	1	0	1984
Unigene10301_A	tetur02g08180	91.35	1041	69	1	664	1704	1080	61	0	1382
Unigene10302_A	tetur08g04240	98.74	716	9	0	106	821	723	8	0	1348
Unigene10303_A	tetur33g00940	99.55	660	3	0	684	1343	660	1	0	1285
Unigene10304_A	tetur08g04240	98.74	716	9	0	106	821	723	8	0	1348
Unigene10305_A	tetur08g04240	98.48	396	6	0	70	465	403	8	0	737
Unigene10306_A	tetur08g04240	99.07	322	3	0	106	427	723	402	6e-176	615
Unigene10307_A	tetur05g08650	99.44	360	2	0	286	645	486	127	0	698
Unigene10308_A	tetur03g05940	97.46	1494	38	0	90	1583	1926	433	0	2660
Unigene1030_A	tetur22g01240	97.64	635	15	0	1	635	1285	651	0	1140
Unigene10310_A	tetur13g04170	98.28	232	4	0	54	285	1	232	1e-119	428
Unigene10311_A	tetur30g00610	99.79	477	1	0	404	880	477	1	0	938
Unigene10312_A	tetur01g15060	98.81	921	11	0	116	1036	921	1	0	1739
Unigene10313_A	tetur02g00550	98.14	2964	55	0	94	3057	1	2964	0	5440
Unigene10314_A	tetur10g02780	98.37	1353	22	0	73	1425	1	1353	0	2508
Unigene10315_A	tetur12g02260	89.58	48	5	0	34	81	615	662	8e-08	56
Unigene10316_A	tetur09g05530	98.82	1943	14	2	1265	3198	867	2809	0	3667
Unigene10317_A	tetur09g05530	99.54	866	1	1	129	991	1	866	0	1681
Unigene10318_A	tetur09g05530	99.54	866	1	1	129	991	1	866	0	1681
Unigene10319_A	tetur25g00570	99.58	475	2	0	863	1337	1041	1515	0	926
Unigene10320_A	tetur06g06610	94.75	381	20	0	772	1152	1	381	4e-170	597
Unigene10321_A	tetur29g01100	92.31	156	11	1	205	359	156	1	6e-53	206
Unigene10322_A	tetur13g00650	91.07	56	5	0	117	172	81	136	2e-12	71.9
Unigene10323_A	tetur14g00110	90.38	52	5	0	117	168	57	108	5e-10	63.9
Unigene10324_A	tetur08g00730	90.95	210	16	2	84	290	2098	1889	9e-67	252
Unigene10325_A	tetur07g03420	98.85	174	2	0	108	281	1	174	8e-90	329
Unigene10326_A	tetur04g01580	100	420	0	0	124	543	1	420	0	833
Unigene10327_A	tetur32g01670	99.3	999	7	0	64	1062	999	1	0	1925
Unigene10328_A	tetur22g02981	98.53	819	12	0	123	941	1	819	0	1528
Unigene10329_A	tetur08g03670	98.51	603	9	0	64	666	603	1	0	1124
Unigene1032_A	tetur10g02360	97.83	552	12	0	1	552	893	1444	0	999
Unigene10330_A	tetur04g04390	97.32	708	19	0	156	863	708	1	0	1253
Unigene10331_A	tetur03g02620	97.32	1979	53	0	176	2154	25	2003	0	3503
Unigene10332_A	tetur03g02620	97.29	1180	32	0	102	1281	824	2003	0	2085
Unigene10333_A	tetur20g02940	98.61	72	1	0	170	241	648	577	8e-32	135
Unigene10334_A	tetur04g00640	99.63	536	2	0	163	698	579	44	0	1047
Unigene10335_A	tetur07g03480	98.1	1629	31	0	1	1629	34	1662	0	2983
Unigene10336_A	tetur07g03480	98.1	1629	31	0	1	1629	34	1662	0	2983
Unigene10337_A	tetur07g03510	100	93	0	0	245	337	26	118	1e-46	184
Unigene10338_A	tetur01g06520	98.44	3012	44	1	1003	4014	1639	4647	0	5594
Unigene10339_A	tetur01g06520	98.41	3963	60	1	4	3966	688	4647	0	7353
Unigene1033_A	tetur10g02360	97.7	391	9	0	92	482	1054	1444	0	704
Unigene10340_A	tetur19g00500	96.3	810	30	0	286	1095	13	822	0	1368
Unigene10341_A	tetur19g00500	92.48	798	60	0	286	1083	13	810	0	1106
Unigene10342_A	tetur19g00500	95.93	810	33	0	140	949	13	822	0	1344
Unigene10343_A	tetur19g00500	92.11	798	63	0	140	937	13	810	0	1082
Unigene10344_A	tetur08g01260	98.9	1272	14	0	87	1358	1	1272	0	2411
Unigene10345_A	tetur11g05780	97.01	635	19	0	52	686	1	635	0	1108
Unigene10346_A	tetur03g05550	98.06	2582	41	1	23	2595	5714	3133	0	4730
Unigene10347_A	tetur09g01360	99.2	624	5	0	1754	2377	1258	1881	0	1197
Unigene10348_A	tetur01g03230	99.44	178	1	0	701	878	1	178	2e-94	345
Unigene10349_A	tetur30g01750	98.04	51	1	0	168	218	1	51	2e-19	93.7
Unigene1034_A	tetur12g00310	99.38	1134	7	0	1	1134	842	1975	0	2192
Unigene10351_A	tetur06g02700	95.74	282	12	0	60	341	2904	2623	1e-130	464
Unigene10352_A	tetur30g00200	99.21	1644	13	0	131	1774	1	1644	0	3156
Unigene10353_A	tetur07g03620	99.3	1143	8	0	237	1379	1	1143	0	2202
Unigene10354_A	tetur27g01310	98.26	5559	85	1	163	5721	5547	1	0	10300
Unigene10356_A	tetur37g00800	99.6	252	1	0	127	378	252	1	7e-139	492
Unigene10357_A	tetur17g02380	99.7	332	0	1	1	331	332	1	0	642
Unigene10358_A	tetur17g02380	99.7	332	0	1	1	331	332	1	0	642
Unigene10359_A	tetur26g00940	97.86	1170	25	0	53	1222	1170	1	0	2121
Unigene10360_A	tetur14g02940	99.78	465	1	0	113	577	1	465	0	914
Unigene10361_A	tetur18g02150	98.82	507	6	0	141	647	1	507	0	957
Unigene10362_A	tetur01g02510	94.62	651	35	0	424	1074	651	1	0	1013
Unigene10363_A	tetur01g02510	92.47	651	49	0	424	1074	651	1	0	902
Unigene10364_A	tetur01g02500	94.29	595	34	0	1	595	595	1	0	910
Unigene10365_A	tetur27g01400	90.59	170	4	1	176	333	2528	2697	2e-58	224
Unigene10366_A	tetur07g05160	97.48	515	13	0	442	956	1	515	0	918
Unigene10367_A	tetur07g05160	97.48	515	13	0	214	728	1	515	0	918
Unigene10368_A	tetur20g00900	100	306	0	0	286	591	1	306	3e-173	607
Unigene10369_A	tetur16g00350	98.45	579	9	0	77	655	1	579	0	1076
Unigene1036_A	tetur16g01330	98.92	372	4	0	1	372	372	1	0	706
Unigene10370_A	tetur05g05200	98.2	111	2	0	346	456	684	574	2e-52	204
Unigene10371_A	tetur09g01850	99.07	539	5	0	52	590	1	539	0	1029
Unigene10372_A	tetur09g01840	99.01	403	4	0	816	1218	1	403	0	767
Unigene10373_A	tetur09g01850	99.07	539	5	0	52	590	1	539	0	1029
Unigene10374_A	tetur09g02570	97.29	517	11	1	1	517	2234	2747	0	910
Unigene10375_A	tetur17g01510	99.25	669	4	1	260	927	1	669	0	1279
Unigene10376_A	tetur08g00310	99.24	1440	11	0	113	1552	1440	1	0	2767
Unigene10377_A	tetur05g06840	98.29	1110	19	0	826	1935	1110	1	0	2050
Unigene10378_A	tetur05g04590	96.25	854	32	0	813	1666	644	1497	0	1439
Unigene10379_A	tetur05g04590	96.23	822	31	0	813	1634	644	1465	0	1384
Unigene1037_A	tetur55g00010	96.56	320	11	0	1	320	2825	2506	8e-156	547
Unigene10380_A	tetur25g00510	98.13	588	11	0	30	617	1	588	0	1078
Unigene10381_A	tetur18g02770	98.57	1542	22	0	430	1971	1542	1	0	2882
Unigene10382_A	tetur07g00160	95.45	198	9	0	2	199	4765	4962	6e-88	321
Unigene10383_A	tetur02g11460	98.62	725	10	0	601	1325	725	1	0	1358
Unigene10384_A	tetur02g11460	98.67	1125	15	0	162	1286	1125	1	0	2111
Unigene10385_A	tetur02g04820	97.49	1671	42	0	72	1742	1671	1	0	2979
Unigene10386_A	tetur27g02100	93.75	64	4	0	418	481	885	948	2e-19	95.6
Unigene10387_A	tetur04g02970	99.01	3840	35	1	151	3990	3837	1	0	7307
Unigene10388_A	tetur04g02970	98.98	3718	35	1	151	3868	3837	123	0	7065
Unigene10389_A	tetur08g02920	100	558	0	0	213	770	1	558	0	1106
Unigene1038_A	tetur01g12230	98.64	295	4	0	257	551	414	120	2e-157	553
Unigene10390_A	tetur01g13490	98.97	3009	31	0	80	3088	1	3009	0	5719
Unigene10391_A	tetur43g00170	98.18	329	6	0	80	408	329	1	8e-173	605
Unigene10392_A	tetur01g06610	98.17	600	11	0	88	687	1	600	0	1102
Unigene10393_A	tetur09g04920	96.02	201	8	0	179	379	580	380	7e-92	335
Unigene10394_A	tetur01g04390	99.48	1152	6	0	293	1444	1152	1	0	2236
Unigene10395_A	tetur21g01790	97.39	2564	52	4	892	3452	2552	1	0	4542
Unigene10396_A	tetur06g05110	97.09	309	9	0	165	473	774	466	8e-154	541
Unigene10397_A	tetur09g04420	97.27	990	27	0	149	1138	1	990	0	1748
Unigene10398_A	tetur02g07190	98.56	1455	21	0	60	1514	1455	1	0	2718
Unigene10399_A	tetur14g01800	96.59	528	15	1	85	609	528	1	0	900
Unigene1039_A	tetur01g12230	99.46	185	1	0	257	441	414	230	7e-99	359
Unigene10400_A	tetur28g01740	98.68	453	6	0	191	643	1	453	0	850
Unigene10401_A	tetur28g01740	98.44	771	12	0	191	961	1	771	0	1433
Unigene10402_A	tetur28g01730	93.15	146	10	0	64	209	1	146	1e-54	210
Unigene10403_A	tetur32g00130	99.58	1182	5	0	132	1313	1	1182	0	2303
Unigene10404_A	tetur17g03340	97.47	79	2	0	298	376	1122	1044	2e-33	141
Unigene10405_A	tetur30g01730	94.74	760	40	0	170	929	779	20	0	1189
Unigene10406_A	tetur30g01770	90.69	806	75	0	56	861	810	5	0	1003
Unigene10407_A	tetur30g01770	95.29	806	38	0	56	861	810	5	0	1296
Unigene10408_A	tetur30g01730	93.84	487	30	0	330	816	506	20	0	728
Unigene10409_A	tetur02g03850	97.82	1696	37	0	231	1926	1696	1	0	3069
Unigene1040_A	tetur39g00430	98.72	235	3	0	1	235	1850	1616	3e-124	442
Unigene10410_A	tetur21g02890	99.47	1708	5	1	193	1900	1	1704	0	3313
Unigene10411_A	tetur15g02730	99.51	1834	9	0	1	1834	3064	4897	0	3564
Unigene10412_A	tetur15g02730	99.51	1834	9	0	1	1834	3064	4897	0	3564
Unigene10413_A	tetur15g02730	99.51	1834	9	0	1	1834	3064	4897	0	3564
Unigene10414_A	tetur15g02730	99.51	1834	9	0	1	1834	3064	4897	0	3564
Unigene10415_A	tetur09g03110	99.22	255	2	0	155	409	255	1	3e-138	490
Unigene10417_A	tetur16g02260	99.02	713	7	0	177	889	1	713	0	1358
Unigene10418_A	tetur05g03990	99.25	1327	10	0	636	1962	396	1722	0	2551
Unigene10419_A	tetur05g03990	99.36	1722	11	0	93	1814	1	1722	0	3326
Unigene1041_A	tetur03g08610	99.01	302	3	0	1	302	1868	2169	3e-164	575
Unigene10420_A	tetur05g03980	95.08	1950	96	0	1	1950	40	1989	0	3104
Unigene10421_A	tetur05g03980	94.9	1315	67	0	488	1802	675	1989	0	2076
Unigene10422_A	tetur24g01190	99.08	1407	13	0	120	1526	1	1407	0	2686
Unigene10423_A	tetur29g00190	99.21	890	7	0	3	892	890	1	0	1709
Unigene10424_A	tetur01g13720	98.99	1677	17	0	444	2120	1677	1	0	3190
Unigene10425_A	tetur13g03820	97.32	597	16	0	212	808	1	597	0	1057
Unigene10426_A	tetur04g07570	99.58	1665	7	0	134	1798	1	1665	0	3245
Unigene10427_A	tetur27g02490	99.56	228	1	0	164	391	228	1	1e-124	444
Unigene10428_A	tetur27g02490	99.56	228	1	0	130	357	228	1	1e-124	444
Unigene10429_A	tetur03g00100	99.7	666	2	0	76	741	666	1	0	1304
Unigene1042_A	tetur10g02920	97.69	519	12	0	1	519	1401	1919	0	934
Unigene10430_A	tetur06g02230	98.91	7515	82	0	254	7768	7515	1	0	14300
Unigene10431_A	tetur19g02980	98.54	2675	21	1	1	2657	257	2931	0	5019
Unigene10432_A	tetur03g02990	99.17	2055	17	0	64	2118	1	2055	0	3939
Unigene10433_A	tetur02g11060	98.63	657	9	0	51	707	657	1	0	1231
Unigene10434_A	tetur01g08760	99.04	934	6	1	316	1249	1	931	0	1776
Unigene10435_A	tetur01g08760	99.04	934	6	1	316	1249	1	931	0	1776
Unigene10436_A	tetur01g08760	98.71	700	6	1	136	835	235	931	0	1312
Unigene10437_A	tetur02g14010	99.7	662	2	0	1	662	1777	2438	0	1296
Unigene10438_A	tetur01g08760	98.71	700	6	1	136	835	235	931	0	1312
Unigene10439_A	tetur20g02580	99.61	763	0	1	639	1398	606	1368	0	1485
Unigene1043_A	tetur02g10970	94.87	78	3	1	661	737	78	1	3e-25	115
Unigene10440_A	tetur08g04450	98.41	565	9	0	396	960	225	789	0	1049
Unigene10441_A	tetur08g04450	97.85	789	17	0	80	868	1	789	0	1429
Unigene10445_A	tetur01g07640	99.52	210	1	0	128	337	210	1	7e-114	408
Unigene10446_A	tetur03g06050	98.63	1311	18	0	103	1413	1311	1	0	2456
Unigene10447_A	tetur03g06050	98.65	1184	16	0	103	1286	1311	128	0	2220
Unigene10448_A	tetur06g04690	98.88	2313	26	0	64	2376	1	2313	0	4379
Unigene10449_A	tetur29g01580	99.73	372	1	0	121	492	1	372	0	729
Unigene1044_A	tetur20g03437	98.23	113	2	0	1	113	2816	2928	7e-54	208
Unigene10450_A	tetur08g00140	99.31	1449	10	0	118	1566	1	1449	0	2793
Unigene10451_A	tetur35g00670	99.47	1332	7	0	456	1787	1332	1	0	2585
Unigene10452_A	tetur238g00020	88.45	251	26	1	41	291	1	248	2e-70	264
Unigene10453_A	tetur38g00330	97.25	1383	29	1	180	1553	1383	1	0	2448
Unigene10454_A	tetur09g02960	99.71	690	2	0	577	1266	1	690	0	1352
Unigene10455_A	tetur17g02060	99.1	777	7	0	259	1035	777	1	0	1485
Unigene10456_A	tetur01g03940	97.01	469	2	1	1	457	825	1293	0	833
Unigene10457_A	tetur05g06230	98.81	1933	23	0	1	1933	1933	1	0	3650
Unigene10458_A	tetur16g00560	99.31	435	3	0	104	538	435	1	0	839
Unigene10459_A	tetur05g07810	99.08	435	4	0	186	620	1	435	0	831
Unigene1045_A	tetur36g01200	98.01	301	6	0	1	301	1365	1665	3e-156	549
Unigene10460_A	tetur01g00620	99.79	975	2	0	89	1063	975	1	0	1917
Unigene10461_A	tetur18g01720	99.77	2199	5	0	138	2336	100	2298	0	4320
Unigene10462_A	tetur28g02460	98.15	1296	24	0	207	1502	1296	1	0	2379
Unigene10463_A	tetur02g11420	97.69	909	21	0	42	950	1	909	0	1635
Unigene10464_A	tetur06g04410	100	273	0	0	72	344	273	1	9e-154	541
Unigene10465_A	tetur08g07240	98.12	693	13	0	244	936	693	1	0	1271
Unigene10466_A	tetur06g04700	98.99	2369	24	0	1	2369	4577	6945	0	4506
Unigene10467_A	tetur17g00910	99.27	1230	9	0	164	1393	1	1230	0	2367
Unigene10468_A	tetur01g00780	99.65	284	1	0	2	285	284	1	4e-158	555
Unigene10469_A	tetur38g00040	99.19	4717	38	0	214	4930	1	4717	0	9049
Unigene10470_A	tetur38g00040	99.19	4717	38	0	214	4930	1	4717	0	9049
Unigene10471_A	tetur08g03210	98.62	1158	16	0	231	1388	1158	1	0	2169
Unigene10472_A	tetur30g00470	99.53	1286	6	0	131	1416	1	1286	0	2502
Unigene10473_A	tetur36g01230	98.05	924	15	1	215	1135	1	924	0	1685
Unigene10474_A	tetur05g08900	99.68	930	3	0	398	1327	1	930	0	1820
Unigene10475_A	tetur05g08900	99.67	899	3	0	206	1104	32	930	0	1758
Unigene10476_A	tetur06g03660	98.66	2975	40	0	53	3027	2136	5110	0	5580
Unigene10478_A	tetur02g02310	99.38	161	1	0	1118	1278	161	1	4e-84	311
Unigene10479_A	tetur10g00760	96.13	1213	44	1	1	1213	1210	1	0	2028
Unigene1047_A	tetur02g10240	96.91	614	19	0	1	614	5579	4966	0	1066
Unigene10480_A	tetur10g00750	92.4	1066	78	1	117	1182	1067	5	0	1467
Unigene10481_A	tetur10g00740	94.01	784	38	1	1	784	1054	280	0	1189
Unigene10482_A	tetur10g03350	99.28	1389	10	0	94	1482	1389	1	0	2674
Unigene10483_A	tetur12g00850	99.54	3879	18	0	54	3932	3879	1	0	7547
Unigene10484_A	tetur12g00850	99.54	3879	18	0	54	3932	3879	1	0	7547
Unigene10485_A	tetur21g00140	99.05	2310	22	0	138	2447	1	2310	0	4405
Unigene10486_A	tetur07g04310	98.74	2622	33	0	172	2793	1	2622	0	4936
Unigene10487_A	tetur37g00670	98.96	384	4	0	74	457	1	384	0	729
Unigene10488_A	tetur06g04880	95.24	147	7	0	1	147	147	1	3e-62	236
Unigene10489_A	tetur07g04190	98.68	378	5	0	201	578	1	378	0	710
Unigene1048_A	tetur38g00040	93.44	61	4	0	143	203	70	10	6e-18	89.7
Unigene10490_A	tetur04g01650	99.28	1113	8	0	179	1291	1113	1	0	2143
Unigene10491_A	tetur04g01650	99.48	575	3	0	179	753	1113	539	0	1116
Unigene10493_A	tetur04g04130	98.56	555	8	0	32	586	555	1	0	1037
Unigene10494_A	tetur04g07340	99.93	1488	1	0	1196	2683	1488	1	0	2942
Unigene10495_A	tetur04g07340	99.89	922	1	0	1196	2117	1488	567	0	1820
Unigene10496_A	tetur04g07340	100	1275	0	0	510	1784	1275	1	0	2527
Unigene10497_A	tetur04g07340	100	709	0	0	510	1218	1275	567	0	1405
Unigene10498_A	tetur07g05680	98.69	609	8	0	486	1094	609	1	0	1144
Unigene10499_A	tetur08g00400	99.04	627	6	0	599	1225	1	627	0	1195
Unigene1049_A	tetur08g07670	99.03	308	3	0	2	309	845	538	9e-168	587
Unigene104_A	tetur05g04460	98.94	566	6	0	1	566	262	827	0	1074
Unigene10500_A	tetur09g01220	99.68	627	2	0	122	748	627	1	0	1227
Unigene10501_A	tetur08g06280	97.17	812	14	1	491	1302	1	803	0	1435
Unigene10502_A	tetur08g06280	97.17	812	14	1	412	1223	1	803	0	1435
Unigene10503_A	tetur08g06280	97.28	808	13	1	137	944	5	803	0	1435
Unigene10504_A	tetur08g06280	97.28	808	13	1	129	936	5	803	0	1435
Unigene10505_A	tetur13g03530	99.65	4550	16	0	343	4892	7728	3179	0	8893
Unigene10506_A	tetur37g00610	100	330	0	0	370	699	1	330	0	654
Unigene10507_A	tetur07g05320	98.13	375	7	0	131	505	375	1	0	688
Unigene10508_A	tetur01g05730	97.28	624	17	0	80	703	1	624	0	1102
Unigene10509_A	tetur01g05730	96.71	487	16	0	185	671	138	624	0	839
Unigene1050_A	tetur01g15000	97.14	420	12	0	1	420	68	487	0	737
Unigene10510_A	tetur36g00330	98.67	603	8	0	159	761	615	13	0	1132
Unigene10511_A	tetur33g00470	99.47	567	3	0	166	732	1	567	0	1100
Unigene10512_A	tetur16g00660	98.65	960	13	0	288	1247	1	960	0	1800
Unigene10513_A	tetur10g03180	99.45	1644	9	0	139	1782	1	1644	0	3188
Unigene10514_A	tetur36g00490	99.67	921	3	0	120	1040	921	1	0	1802
Unigene10515_A	tetur36g00490	99.13	921	8	0	120	1040	921	1	0	1762
Unigene10516_A	tetur36g00490	99.13	921	8	0	120	1040	921	1	0	1762
Unigene10517_A	tetur02g07430	99.65	855	3	0	272	1126	855	1	0	1671
Unigene10518_A	tetur29g01590	98.71	542	7	0	135	676	648	107	0	1019
Unigene10519_A	tetur47g00180	99.52	2277	11	0	131	2407	2277	1	0	4427
Unigene10520_A	tetur01g15330	91.6	2763	227	3	1328	4086	2953	192	0	3618
Unigene10521_A	tetur01g15330	91.6	2763	227	3	1237	3995	2953	192	0	3618
Unigene10522_A	tetur01g15330	91.6	2763	227	3	1328	4086	2953	192	0	3618
Unigene10523_A	tetur01g15330	92.65	3782	273	3	132	3909	3972	192	0	5273
Unigene10524_A	tetur01g15330	91.6	2763	227	3	1237	3995	2953	192	0	3618
Unigene10525_A	tetur01g15330	92.52	3715	273	3	108	3818	3905	192	0	5140
Unigene10526_A	tetur01g15330	92.65	3782	273	3	132	3909	3972	192	0	5273
Unigene10527_A	tetur01g15330	92.52	3715	273	3	108	3818	3905	192	0	5140
Unigene10528_A	tetur22g02730	95.89	438	18	0	110	547	1	438	0	726
Unigene10529_A	tetur22g02730	95.89	438	18	0	110	547	1	438	0	726
Unigene1052_A	tetur12g02180	97.84	370	8	0	92	461	798	429	0	670
Unigene10530_A	tetur13g00520	97.71	350	8	0	394	743	350	1	2e-180	630
Unigene10531_A	tetur13g00520	97.87	375	8	0	295	669	375	1	0	680
Unigene10532_A	tetur01g13140	99.12	342	3	0	194	535	567	226	0	654
Unigene10533_A	tetur01g13140	99.12	341	3	0	194	534	567	227	0	652
Unigene10534_A	tetur07g01520	97.33	375	10	0	155	529	375	1	0	664
Unigene10535_A	tetur05g07300	95.65	207	9	0	177	383	407	201	5e-93	339
Unigene10536_A	tetur07g03200	98.8	333	4	0	187	519	333	1	6e-180	628
Unigene10537_A	tetur02g08130	97.98	942	10	1	109	1041	1	942	0	1725
Unigene10538_A	tetur02g08260	98.86	615	7	0	708	1322	615	1	0	1164
Unigene10539_A	tetur18g03590	99.01	405	4	0	108	512	1	405	0	771
Unigene1053_A	tetur12g02180	98.35	243	4	0	92	334	798	556	2e-126	450
Unigene10540_A	tetur07g00790	97.55	204	5	0	120	323	204	1	9e-101	365
Unigene10541_A	tetur02g12810	97.93	1062	22	0	212	1273	1	1062	0	1931
Unigene10542_A	tetur38g00110	100	684	0	0	301	984	684	1	0	1356
Unigene10543_A	tetur07g04770	99.05	423	4	0	42	464	423	1	0	807
Unigene10544_A	tetur04g01770	99.41	510	3	0	105	614	1	510	0	987
Unigene10545_A	tetur34g00420	97.44	39	1	0	3809	3847	52	14	7e-11	69.9
Unigene10547_A	tetur02g05060	99.34	453	3	0	233	685	453	1	0	874
Unigene10548_A	tetur35g01400	98.88	624	7	0	113	736	1	624	0	1181
Unigene10549_A	tetur10g04290	99.02	1428	14	0	111	1538	1428	1	0	2720
Unigene1054_A	tetur21g02740	94.12	238	11	1	26	263	1	235	1e-98	357
Unigene10550_A	tetur06g00760	98.96	4530	44	1	187	4716	1	4527	0	8603
Unigene10551_A	tetur06g00760	98.82	3389	40	0	191	3579	1139	4527	0	6401
Unigene10552_A	tetur10g02040	97.67	257	6	0	1	257	576	320	3e-130	462
Unigene10553_A	tetur04g03220	99.53	2739	13	0	120	2858	1	2739	0	5327
Unigene10554_A	tetur04g03220	97.75	1553	29	1	120	1666	1	1553	0	2803
Unigene10555_A	tetur32g01840	99.37	630	4	0	296	925	630	1	0	1217
Unigene10556_A	tetur106g00010	96.86	765	24	0	132	896	765	1	0	1326
Unigene10557_A	tetur01g13320	97.39	306	8	0	107	412	306	1	2e-154	543
Unigene10558_A	tetur22g02971	83.53	249	23	2	33	263	1742	1990	1e-46	184
Unigene10559_A	tetur05g03200	99.11	894	8	0	459	1352	1	894	0	1709
Unigene1055_A	tetur09g05380	96.82	157	5	0	288	444	3226	3070	1e-72	272
Unigene10560_A	tetur02g03660	99.02	1125	11	0	524	1648	1125	1	0	2143
Unigene10561_A	tetur02g03660	97.77	1122	22	1	524	1642	1125	4	0	2022
Unigene10562_A	tetur14g00900	99.43	2980	14	1	1	2977	24	3003	0	5769
Unigene10563_A	tetur20g03110	98.41	819	13	0	471	1289	819	1	0	1520
Unigene10564_A	tetur35g00280	99.22	515	4	0	667	1181	515	1	0	989
Unigene10565_A	tetur20g03110	98.07	623	12	0	259	881	623	1	0	1140
Unigene10566_A	tetur35g00280	99.25	663	5	0	111	773	663	1	0	1275
Unigene1056_A	tetur09g04250	99.01	604	6	0	1	604	1037	1640	0	1150
Unigene10570_A	tetur29g00250	99.49	971	5	0	150	1120	5	975	0	1885
Unigene10571_A	tetur13g01850	100	129	0	0	525	653	1	129	1e-67	256
Unigene10572_A	tetur11g01320	99.22	765	6	0	68	832	1	765	0	1469
Unigene10573_A	tetur07g01530	98.54	411	6	0	98	508	1	411	0	767
Unigene10574_A	tetur13g04746	95.98	423	17	0	70	492	1	423	0	704
Unigene10575_A	tetur13g04746	95.98	423	17	0	70	492	1	423	0	704
Unigene10576_A	tetur08g08369	98.65	222	3	0	219	440	1	222	5e-116	416
Unigene10577_A	tetur14g01450	99.53	213	1	0	98	310	213	1	9e-116	414
Unigene10578_A	tetur28g01250	97.53	770	19	0	81	850	1	770	0	1376
Unigene10579_A	tetur04g03250	98.92	651	7	0	374	1024	1	651	0	1235
Unigene1057_A	tetur01g13080	87.27	110	14	0	152	261	250	359	2e-23	107
Unigene10580_A	tetur11g04970	92.2	1116	84	1	297	1412	1113	1	0	1518
Unigene10581_A	tetur20g01920	99.32	1617	11	0	120	1736	1617	1	0	3118
Unigene10583_A	tetur11g03300	98.46	648	10	0	96	743	1	648	0	1205
Unigene10584_A	tetur09g06230	94.05	807	27	2	161	946	807	1	0	1241
Unigene10585_A	tetur02g09530	92.18	294	23	0	1	294	294	1	2e-111	400
Unigene10586_A	tetur01g05560	99.26	543	4	0	332	874	543	1	0	1045
Unigene10587_A	tetur21g00760	99.38	3708	23	0	81	3788	3708	1	0	7168
Unigene10588_A	tetur10g00090	96.72	915	18	2	69	983	1	903	0	1580
Unigene10589_A	tetur26g02320	99.35	459	3	0	366	824	459	1	0	886
Unigene1058_A	tetur08g05000	95	200	10	0	1	200	3547	3746	8e-87	317
Unigene10591_A	tetur20g02530	99.54	656	3	0	777	1432	1	656	0	1277
Unigene10592_A	tetur18g00870	99.63	1623	6	0	347	1969	1	1623	0	3170
Unigene10593_A	tetur18g00870	99.42	861	5	0	347	1207	1	861	0	1667
Unigene10594_A	tetur18g00870	99.87	762	1	0	107	868	862	1623	0	1503
Unigene10596_A	tetur18g00860	98.95	286	3	0	77	362	36	321	1e-154	543
Unigene10597_A	tetur02g03890	99.72	1809	5	0	701	2509	1	1809	0	3546
Unigene10598_A	tetur08g00350	97.11	1629	44	1	143	1771	1	1626	0	2853
Unigene10599_A	tetur39g00640	95.41	567	22	1	242	804	1	567	0	916
Unigene1059_A	tetur05g07520	100	777	0	0	1	777	1034	1810	0	1540
Unigene105_A	tetur11g03560	98.47	1763	15	1	1	1751	2081	319	0	3295
Unigene10600_A	tetur39g00640	95.41	567	22	1	185	747	1	567	0	916
Unigene10601_A	tetur18g02170	100	103	0	0	1	103	103	1	1e-52	204
Unigene10602_A	tetur09g01950	93.73	1085	68	0	554	1638	153	1237	0	1612
Unigene10603_A	tetur09g01950	93.87	1093	67	0	554	1646	153	1245	0	1635
Unigene10604_A	tetur09g01950	93.89	1897	116	0	554	2450	153	2049	0	2841
Unigene10605_A	tetur09g01930	93.38	1254	74	1	201	1445	1	1254	0	1836
Unigene10606_A	tetur09g01950	93.67	1248	73	2	201	1445	1	1245	0	1840
Unigene10607_A	tetur09g01950	93.76	2052	122	2	201	2249	1	2049	0	3045
Unigene10608_A	tetur09g02000	98.24	1308	23	0	405	1712	1	1308	0	2411
Unigene10609_A	tetur09g01960	93.75	336	21	0	97	432	1717	2052	3e-141	500
Unigene1060_A	tetur17g00880	99	500	5	0	11	510	1	500	0	952
Unigene10610_A	tetur26g02370	98.11	423	8	0	144	566	1	423	0	775
Unigene10611_A	tetur224g00010	97.56	1392	34	0	225	1616	1	1392	0	2490
Unigene10612_A	tetur33g00820	97.54	2400	56	1	193	2589	1	2400	0	4286
Unigene10613_A	tetur33g00820	97.92	2400	47	1	105	2501	1	2400	0	4357
Unigene10614_A	tetur11g01810	98.08	3798	50	4	46	3821	1	3797	0	6956
Unigene10615_A	tetur03g08070	97.65	681	16	0	238	918	681	1	0	1223
Unigene10616_A	tetur05g07070	97.41	580	15	0	134	713	1	580	0	1031
Unigene10617_A	tetur02g11960	97.72	657	12	1	152	808	654	1	0	1179
Unigene10618_A	tetur14g01900	97.63	930	22	0	108	1037	930	1	0	1669
Unigene10619_A	tetur05g01470	97.96	441	9	0	137	577	1	441	0	803
Unigene10620_A	tetur07g05350	99.68	316	1	0	961	1276	1	316	1e-176	618
Unigene10621_A	tetur07g05350	99.68	316	1	0	797	1112	1	316	1e-176	618
Unigene10622_A	tetur05g01400	98.95	1524	16	0	129	1652	1	1524	0	2894
Unigene10623_A	tetur28g01920	99.68	618	2	0	79	696	1	618	0	1209
Unigene10625_A	tetur01g03260	98.45	1158	18	0	118	1275	1	1158	0	2153
Unigene10626_A	tetur23g01400	99.15	234	2	0	150	383	234	1	9e-126	448
Unigene10627_A	tetur09g04820	99.29	849	6	0	149	997	849	1	0	1635
Unigene10628_A	tetur30g01290	97.71	1704	36	1	49	1752	1701	1	0	3065
Unigene1062_A	tetur31g00190	99.6	495	2	0	1	495	2553	2059	0	965
Unigene10630_A	tetur07g07160	98.82	679	8	0	29	707	700	22	0	1283
Unigene10631_A	tetur08g06530	99.07	324	3	0	79	402	324	1	5e-177	618
Unigene10632_A	tetur01g03220	96.14	233	9	0	106	338	233	1	2e-108	391
Unigene10633_A	tetur28g01360	93.61	579	37	0	6	584	255	833	0	854
Unigene10634_A	tetur28g01360	94.08	760	45	0	6	765	255	1014	0	1150
Unigene10635_A	tetur28g01360	93.43	685	45	0	6	690	255	939	0	1001
Unigene10636_A	tetur06g06721	98.7	1539	20	0	176	1714	1	1539	0	2892
Unigene10637_A	tetur06g06721	98.7	1539	20	0	104	1642	1	1539	0	2892
Unigene10638_A	tetur19g02530	99.86	713	1	0	2	714	713	1	0	1405
Unigene10639_A	tetur16g02150	98.67	603	8	0	449	1051	603	1	0	1132
Unigene10640_A	tetur26g00990	99.31	435	3	0	137	571	435	1	0	839
Unigene10642_A	tetur01g00950	97.71	741	17	0	131	871	741	1	0	1334
Unigene10643_A	tetur01g01000	94.4	714	40	0	152	865	714	1	0	1098
Unigene10644_A	tetur14g02500	95.95	1087	32	2	3101	4187	1075	1	0	1810
Unigene10646_A	tetur01g02730	98.76	804	10	0	599	1402	804	1	0	1515
Unigene10647_A	tetur04g03470	98.51	1008	15	0	116	1123	1008	1	0	1879
Unigene10648_A	tetur04g03470	98.51	1008	15	0	116	1123	1008	1	0	1879
Unigene10649_A	tetur08g00510	98.98	1371	14	0	170	1540	1	1371	0	2607
Unigene1064_A	tetur01g13080	93.59	78	5	0	1	78	936	1013	1e-25	115
Unigene10650_A	tetur03g08710	97.1	828	12	2	40	861	1	822	0	1455
Unigene10651_A	tetur06g04420	99.16	1071	9	0	5	1075	958	2028	0	2052
Unigene10652_A	tetur06g04420	98.82	1524	18	0	5	1528	958	2481	0	2878
Unigene10653_A	tetur06g04420	99.16	1071	9	0	5	1075	958	2028	0	2052
Unigene10654_A	tetur06g04420	98.82	1524	18	0	5	1528	958	2481	0	2878
Unigene10655_A	tetur03g04660	99.61	510	2	0	12	521	1160	1669	0	995
Unigene10656_A	tetur06g04420	99.16	1071	9	0	5	1075	958	2028	0	2052
Unigene10657_A	tetur03g04660	99.61	509	2	0	12	520	1160	1668	0	993
Unigene10658_A	tetur14g02400	98.31	474	8	0	226	699	1	474	0	876
Unigene10659_A	tetur37g00620	97.33	675	15	1	151	825	1	672	0	1191
Unigene1065_A	tetur23g00090	97.08	308	9	0	66	373	1	308	2e-153	539
Unigene10660_A	tetur08g04180	100	88	0	0	732	819	759	672	3e-43	174
Unigene10661_A	tetur26g02400	99.52	621	3	0	190	810	621	1	0	1207
Unigene10662_A	tetur02g00530	99.27	1511	11	0	1267	2777	1550	40	0	2908
Unigene10663_A	tetur03g00330	99.12	5097	45	0	84	5180	5097	1	0	9747
Unigene10664_A	tetur14g03010	98.83	1200	14	0	94	1293	1	1200	0	2268
Unigene10665_A	tetur06g02130	93.88	539	27	1	115	653	549	17	0	809
Unigene10666_A	tetur01g16320	84.62	117	18	0	1	117	1105	989	4e-18	89.7
Unigene10667_A	tetur17g00700	99.05	1056	10	0	491	1546	1056	1	0	2014
Unigene10668_A	tetur19g00680	97.92	48	1	0	4421	4468	78	31	3e-16	87.7
Unigene10669_A	tetur09g02250	96.15	338	13	0	20	357	799	1136	1e-161	567
Unigene1066_A	tetur03g01350	99.36	471	3	0	118	588	1	471	0	910
Unigene10670_A	tetur08g07740	98.88	1518	14	1	339	1853	1	1518	0	2870
Unigene10671_A	tetur08g07740	98.88	1518	14	1	274	1788	1	1518	0	2870
Unigene10672_A	tetur08g07740	98.81	1093	10	1	270	1359	426	1518	0	2060
Unigene10673_A	tetur08g07740	99.81	523	1	0	764	1286	996	1518	0	1029
Unigene10674_A	tetur08g07740	99.81	523	1	0	699	1221	996	1518	0	1029
Unigene10675_A	tetur07g02770	99.46	557	3	0	116	672	557	1	0	1080
Unigene10676_A	tetur32g01190	99.23	1557	12	0	203	1759	1	1557	0	2991
Unigene10677_A	tetur20g00770	99.44	6486	30	2	2163	8645	1798	8280	0	12600
Unigene10678_A	tetur01g11900	98.98	1770	18	0	80	1849	1	1770	0	3366
Unigene10679_A	tetur08g01590	98.56	555	8	0	118	672	555	1	0	1037
Unigene1067_A	tetur14g00320	97.52	161	4	0	1	161	229	389	1e-77	287
Unigene10681_A	tetur03g01310	99.86	723	1	0	70	792	723	1	0	1425
Unigene10682_A	tetur19g00700	99.62	1040	4	0	45	1084	1	1040	0	2030
Unigene10683_A	tetur19g00560	98.37	1167	13	1	434	1600	1161	1	0	2165
Unigene10684_A	tetur06g00510	99.07	642	6	0	718	1359	825	184	0	1225
Unigene10685_A	tetur11g01590	98.77	1142	14	0	93	1234	1	1142	0	2153
Unigene10686_A	tetur14g01580	95.97	968	39	0	178	1145	1	968	0	1610
Unigene10687_A	tetur11g01590	96.92	1070	33	0	93	1162	1	1070	0	1859
Unigene10688_A	tetur14g01580	98.58	1620	23	0	178	1797	1	1620	0	3029
Unigene10689_A	tetur02g11560	99.46	1674	9	0	156	1829	1674	1	0	3247
Unigene1068_A	tetur10g03970	98.43	572	9	0	253	824	574	3	0	1063
Unigene10690_A	tetur38g00090	98.15	162	3	0	356	517	162	1	4e-80	297
Unigene10691_A	tetur13g04000	99.83	576	1	0	125	700	1	576	0	1134
Unigene10692_A	tetur05g06120	99.75	1581	4	0	52	1632	1581	1	0	3102
Unigene10693_A	tetur21g01730	98.2	1945	23	1	1	1945	918	2850	0	3592
Unigene10696_A	tetur09g00510	89.47	684	72	0	145	828	684	1	0	785
Unigene10697_A	tetur09g00510	90.64	684	64	0	144	827	684	1	0	848
Unigene10698_A	tetur09g00540	95.63	687	21	1	145	831	678	1	0	1132
Unigene10699_A	tetur09g00540	93.45	687	36	1	144	830	678	1	0	1013
Unigene1069_A	tetur01g14490	98.95	475	5	0	122	596	99	573	0	902
Unigene10700_A	tetur12g02460	98.46	1425	22	0	998	2422	583	2007	0	2650
Unigene10701_A	tetur20g00580	98	2301	43	1	242	2542	2298	1	0	4193
Unigene10702_A	tetur30g02190	100	292	0	0	29	320	1	292	5e-165	579
Unigene10703_A	tetur30g02190	100	292	0	0	29	320	1	292	4e-165	579
Unigene10704_A	tetur11g06372	98.71	1083	14	0	232	1314	1083	1	0	2036
Unigene10706_A	tetur09g02130	96.89	740	23	0	111	850	1	740	0	1285
Unigene10708_A	tetur06g00530	99.43	174	1	0	552	725	174	1	5e-92	337
Unigene10709_A	tetur10g01960	95.79	1472	53	1	282	1744	656	2127	0	2434
Unigene10710_A	tetur10g01960	97.08	1472	43	0	282	1753	656	2127	0	2577
Unigene10711_A	tetur10g02040	97.15	1335	38	0	422	1756	1162	2496	0	2345
Unigene10712_A	tetur10g02040	81.25	144	27	0	256	399	993	1136	2e-12	71.9
Unigene10713_A	tetur21g02310	99.84	1264	2	0	216	1479	78	1341	0	2490
Unigene10714_A	tetur21g02310	99.85	1341	2	0	129	1469	1	1341	0	2642
Unigene10715_A	tetur01g03360	99.12	342	3	0	305	646	342	1	0	654
Unigene10716_A	tetur32g01350	99.28	1113	8	0	212	1324	1	1113	0	2143
Unigene10717_A	tetur02g06070	98.45	579	9	0	484	1062	1	579	0	1076
Unigene10718_A	tetur03g06500	99.63	273	1	0	234	506	273	1	2e-151	533
Unigene10719_A	tetur06g05570	96.93	1530	47	0	260	1789	2421	892	0	2660
Unigene10720_A	tetur06g05570	96.55	1972	68	0	260	2231	2421	450	0	3370
Unigene10721_A	tetur04g01610	96.62	296	4	1	330	625	615	326	4e-144	509
Unigene10722_A	tetur43g00580	94.46	650	30	2	95	744	1	644	0	995
Unigene10723_A	tetur20g00030	94.47	398	22	0	344	741	13	410	1e-175	615
Unigene10724_A	tetur08g02760	97.6	501	12	0	96	596	1	501	0	898
Unigene10725_A	tetur08g02860	99.32	2205	15	0	1348	3552	1	2205	0	4252
Unigene10726_A	tetur08g02860	99.36	2173	14	0	229	2401	33	2205	0	4197
Unigene10727_A	tetur14g03740	99.69	963	3	0	127	1089	1	963	0	1885
Unigene10728_A	tetur25g00040	98.65	962	13	0	3	964	962	1	0	1804
Unigene10729_A	tetur20g02000	100	231	0	0	181	411	231	1	1e-128	458
Unigene10730_A	tetur16g02370	99.34	152	1	0	104	255	152	1	3e-79	293
Unigene10731_A	tetur16g02370	98.59	213	3	0	1	213	213	1	5e-111	398
Unigene10732_A	tetur06g05150	99.12	3876	34	0	739	4614	6195	2320	0	7414
Unigene10733_A	tetur06g05150	99.44	2129	12	0	739	2867	6195	4067	0	4125
Unigene10734_A	tetur06g05150	99.44	2129	12	0	739	2867	6195	4067	0	4125
Unigene10735_A	tetur06g05150	99.48	2517	13	0	739	3255	6195	3679	0	4886
Unigene10736_A	tetur17g02710	97.03	909	27	0	387	1295	909	1	0	1588
Unigene10737_A	tetur25g00400	98.93	2431	26	0	2747	5177	2431	1	0	4613
Unigene10738_A	tetur09g05410	99.61	1548	6	0	219	1766	1548	1	0	3021
Unigene10739_A	tetur08g06250	99.34	606	4	0	585	1190	606	1	0	1170
Unigene10740_A	tetur06g01370	98.5	1536	23	0	294	1829	1536	1	0	2863
Unigene10741_A	tetur06g01370	93.26	178	12	0	888	1065	178	1	5e-68	258
Unigene10742_A	tetur02g10540	98.93	1122	12	0	491	1612	1961	840	0	2129
Unigene10743_A	tetur02g10540	98.95	1141	12	0	60	1200	1980	840	0	2167
Unigene10744_A	tetur02g10540	98.3	470	8	0	119	588	1309	840	0	868
Unigene10745_A	tetur08g01330	98.67	826	8	1	1	826	823	1	0	1546
Unigene10746_A	tetur08g01330	99.02	508	5	0	1	508	823	316	0	967
Unigene10747_A	tetur28g01030	85.95	477	49	3	1	465	2691	2221	2e-117	420
Unigene10748_A	tetur39g00530	96.61	177	6	0	221	397	1	177	5e-82	303
Unigene10749_A	tetur02g01760	92.19	64	5	0	262	325	64	1	3e-17	87.7
Unigene1074_A	tetur17g00160	97.64	297	7	0	1	297	1041	1337	1e-151	533
Unigene10750_A	tetur08g05310	98.22	1011	18	0	100	1110	1011	1	0	1861
Unigene10751_A	tetur07g03970	98.83	597	7	0	135	731	1	597	0	1128
Unigene10752_A	tetur04g05930	98.52	405	6	0	128	532	405	1	0	755
Unigene10753_A	tetur03g08360	99.52	210	1	0	169	378	210	1	1e-113	408
Unigene10754_A	tetur15g01410	95.71	489	21	0	57	545	1	489	0	803
Unigene10755_A	tetur02g11980	98.67	225	3	0	211	435	1	225	6e-118	422
Unigene10756_A	tetur09g04230	100	219	0	0	295	513	1	219	5e-121	434
Unigene10757_A	tetur12g03960	99.52	1256	3	1	596	1848	1256	1	0	2438
Unigene10758_A	tetur12g03960	99.62	1600	3	1	171	1767	1600	1	0	3120
Unigene10759_A	tetur22g00710	97.22	324	9	0	154	477	1	324	1e-162	571
Unigene10760_A	tetur31g00280	98.9	1092	12	0	255	1346	1	1092	0	2070
Unigene10761_A	tetur13g04090	99.65	288	1	0	76	363	288	1	2e-160	563
Unigene10762_A	tetur01g03240	98.65	666	9	0	46	711	1	666	0	1249
Unigene10763_A	tetur01g03240	98.77	571	7	0	126	696	96	666	0	1076
Unigene10764_A	tetur01g03240	98.77	571	7	0	78	648	96	666	0	1076
Unigene10765_A	tetur04g08180	98.25	1830	32	0	1	1830	238	2067	0	3374
Unigene10766_A	tetur08g00680	98.94	1038	11	0	50	1087	1038	1	0	1970
Unigene10767_A	tetur14g02740	97.8	546	12	0	127	672	1	546	0	987
Unigene10768_A	tetur14g01640	99.55	666	3	0	2367	3032	666	1	0	1296
Unigene10769_A	tetur14g01640	99.55	666	3	0	2292	2957	666	1	0	1296
Unigene10770_A	tetur07g05350	99.74	3440	9	0	453	3892	644	4083	0	6748
Unigene10771_A	tetur07g05350	99.84	1872	3	0	453	2324	644	2515	0	3687
Unigene10772_A	tetur07g05350	99.84	1872	3	0	453	2324	644	2515	0	3687
Unigene10773_A	tetur01g10170	98.69	1446	19	0	40	1485	1	1446	0	2716
Unigene10774_A	tetur42g00210	100	186	0	0	682	867	26	211	1e-100	369
Unigene10775_A	tetur14g01750	98.3	646	11	0	2527	3172	3452	2807	0	1193
Unigene10776_A	tetur03g08590	99.48	578	3	0	1	578	578	1	0	1122
Unigene10777_A	tetur22g02510	98.43	1400	22	0	1	1400	3304	1905	0	2601
Unigene10778_A	tetur22g02510	97.64	2843	52	1	1	2843	3304	477	0	5124
Unigene10779_A	tetur17g02890	83.91	174	28	0	731	904	483	656	2e-27	123
Unigene1077_A	tetur02g04420	100	100	0	0	171	270	111	12	1e-50	198
Unigene10780_A	tetur05g08150	99.74	386	1	0	450	835	1221	836	0	757
Unigene10781_A	tetur15g02410	98.3	1356	23	0	1053	2408	1	1356	0	2506
Unigene10782_A	tetur15g02410	98.3	1356	23	0	1020	2375	1	1356	0	2506
Unigene10783_A	tetur15g02410	98.3	1356	23	0	483	1838	1	1356	0	2506
Unigene10784_A	tetur11g04330	99.11	1683	15	0	106	1788	1	1683	0	3217
Unigene10785_A	tetur11g04330	99.11	1683	15	0	97	1779	1	1683	0	3217
Unigene10786_A	tetur07g07520	99.35	1071	7	0	283	1353	1	1071	0	2068
Unigene10788_A	tetur04g07300	99.64	1377	5	0	634	2010	1377	1	0	2690
Unigene10789_A	tetur04g01150	100	465	0	0	128	592	465	1	0	922
Unigene1078_A	tetur13g01400	98.65	1411	19	0	1	1411	1411	1	0	2646
Unigene10790_A	tetur09g02080	98.73	1494	19	0	171	1664	1494	1	0	2811
Unigene10791_A	tetur04g09040	99	1698	17	0	144	1841	1698	1	0	3231
Unigene10792_A	tetur19g00980	97.8	1409	31	0	1294	2702	1409	1	0	2547
Unigene10793_A	tetur04g09040	98.36	548	9	0	141	688	548	1	0	1015
Unigene10794_A	tetur19g00980	97.74	1549	32	1	1	1549	1546	1	0	2789
Unigene10795_A	tetur23g00490	97.55	204	5	0	50	253	204	1	7e-101	365
Unigene10796_A	tetur09g01670	97.86	1399	9	2	759	2136	1776	378	0	2557
Unigene10797_A	tetur25g00250	99.21	882	7	0	251	1132	882	1	0	1693
Unigene10798_A	tetur07g03900	100	286	0	0	280	565	7203	6918	2e-161	567
Unigene10799_A	tetur08g03220	99.38	642	4	0	132	773	1	642	0	1241
Unigene10800_A	tetur04g00770	92.13	597	38	1	113	700	1	597	0	819
Unigene10801_A	tetur32g00050	91.36	324	28	0	113	436	1	324	2e-117	420
Unigene10802_A	tetur32g00050	94.77	478	25	0	113	590	1	478	0	749
Unigene10803_A	tetur32g02287	92.96	199	14	0	113	311	1	199	2e-76	283
Unigene10804_A	tetur33g00190	99.09	330	3	0	104	433	1	330	1e-180	630
Unigene10805_A	tetur06g05850	99.08	975	9	0	116	1090	975	1	0	1861
Unigene10806_A	tetur33g00450	100	195	0	0	311	505	1	195	5e-107	387
Unigene10807_A	tetur30g00180	97.28	368	4	1	1	368	692	1053	0	652
Unigene10808_A	tetur07g07440	100	340	0	0	669	1008	774	435	0	674
Unigene10809_A	tetur01g10610	100	816	0	0	136	951	1	816	0	1618
Unigene10810_A	tetur12g02250	88	125	15	0	131	255	27	151	8e-30	129
Unigene10811_A	tetur01g11740	97.76	1026	2	1	40	1065	1	1005	0	1883
Unigene10812_A	tetur14g02650	96.04	808	14	1	214	1003	1491	684	0	1374
Unigene10813_A	tetur06g04450	94.72	417	4	1	327	725	241	657	0	678
Unigene10814_A	tetur09g05740	92.57	1319	86	2	135	1441	1319	1	0	1842
Unigene10815_A	tetur01g11320	96.98	1756	53	0	149	1904	1	1756	0	3061
Unigene10816_A	tetur01g11320	96.98	1756	53	0	143	1898	1	1756	0	3061
Unigene10817_A	tetur19g00760	97.36	720	7	1	118	837	1	708	0	1291
Unigene10818_A	tetur07g00320	93.54	294	7	1	444	725	1	294	8e-125	446
Unigene10819_A	tetur13g03770	98.54	481	7	0	105	585	481	1	0	898
Unigene1081_A	tetur16g02840	100	42	0	0	555	596	75	34	1e-15	83.8
Unigene10820_A	tetur01g14360	97.73	750	17	0	49	798	750	1	0	1352
Unigene10821_A	tetur21g00570	99.1	888	8	0	54	941	1	888	0	1697
Unigene10822_A	tetur32g00410	99.08	870	8	0	179	1048	1	870	0	1661
Unigene10823_A	tetur05g00990	98.81	1257	15	0	99	1355	1257	1	0	2373
Unigene10824_A	tetur22g00050	99.77	1284	3	0	797	2080	1284	1	0	2522
Unigene10825_A	tetur29g01230	96.87	1566	49	0	112	1677	1	1566	0	2716
Unigene10826_A	tetur08g05730	99.54	1527	7	0	961	2487	1	1527	0	2972
Unigene10827_A	tetur08g05730	99.54	1527	7	0	747	2273	1	1527	0	2972
Unigene10828_A	tetur08g02340	99.03	3816	34	1	540	4352	3816	1	0	7267
Unigene10829_A	tetur05g01980	97.56	41	1	0	38	78	102	142	5e-13	73.8
Unigene10830_A	tetur03g08530	98.31	1302	22	0	78	1379	1302	1	0	2407
Unigene10831_A	tetur28g01760	96.17	731	28	0	371	1101	1190	460	0	1227
Unigene10832_A	tetur28g01760	97.87	891	19	0	62	952	1350	460	0	1616
Unigene10833_A	tetur15g02720	99.54	219	1	0	279	497	43	261	4e-119	426
Unigene10834_A	tetur01g16200	92.75	1656	117	2	1471	3126	1653	1	0	2317
Unigene10835_A	tetur01g16200	92.74	1640	116	2	1419	3058	1637	1	0	2294
Unigene10836_A	tetur01g16200	92.75	1656	117	2	1075	2730	1653	1	0	2317
Unigene10837_A	tetur01g16200	92.74	1640	116	2	1023	2662	1637	1	0	2294
Unigene10838_A	tetur01g16190	98.51	1074	16	0	124	1197	49	1122	0	2002
Unigene10839_A	tetur01g16240	98.46	714	11	0	74	787	1	714	0	1328
Unigene1083_A	tetur15g01690	97.02	168	2	1	489	653	1	168	7e-78	289
Unigene10840_A	tetur20g00270	99.68	308	1	0	1610	1917	317	10	1e-171	603
Unigene10841_A	tetur20g00260	98.98	488	5	0	86	573	10	497	0	928
Unigene10842_A	tetur20g00260	99.18	367	3	0	394	760	258	624	0	704
Unigene10843_A	tetur20g00260	99.02	615	6	0	86	700	10	624	0	1172
Unigene10844_A	tetur26g00630	98.77	2919	33	1	91	3009	28	2943	0	5497
Unigene10845_A	tetur26g00630	97.27	954	23	1	91	1044	28	978	0	1681
Unigene10846_A	tetur26g00630	96.81	626	17	1	91	716	28	650	0	1078
Unigene10847_A	tetur26g00540	95.15	165	8	0	1	165	1768	1932	3e-70	264
Unigene10849_A	tetur19g00740	98.22	900	16	0	56	955	900	1	0	1657
Unigene1084_A	tetur08g06130	97.4	462	12	0	1	462	382	843	0	821
Unigene10850_A	tetur08g02490	98.5	1398	21	0	59	1456	1398	1	0	2605
Unigene10851_A	tetur05g00910	98.75	957	12	0	154	1110	1	957	0	1802
Unigene10852_A	tetur05g00910	97.28	957	26	0	142	1098	1	957	0	1691
Unigene10853_A	tetur05g00900	99.56	228	1	0	1	228	730	957	9e-125	444
Unigene10854_A	tetur01g12910	98.6	215	3	0	24	238	1332	1118	5e-112	402
Unigene10855_A	tetur01g12770	98.91	733	8	0	50	782	1230	498	0	1390
Unigene10856_A	tetur26g00300	98.1	735	14	0	229	963	735	1	0	1346
Unigene10857_A	tetur01g01800	99.33	600	4	0	70	669	1	600	0	1158
Unigene10858_A	tetur01g01800	99.7	336	1	0	257	592	265	600	0	658
Unigene10859_A	tetur08g00200	99.52	1047	5	0	162	1208	1	1047	0	2036
Unigene1085_A	tetur23g02452	98.35	484	8	0	3	486	2183	1700	0	896
Unigene10860_A	tetur02g05980	98.91	640	7	0	40	679	1	640	0	1213
Unigene10861_A	tetur02g05980	98.7	1227	16	0	40	1266	1	1227	0	2305
Unigene10862_A	tetur32g01310	99	401	4	0	463	863	401	1	0	763
Unigene10863_A	tetur06g00860	99.83	1185	2	0	108	1292	1	1185	0	2333
Unigene10864_A	tetur14g01410	99.73	1488	4	0	1	1488	1669	182	0	2918
Unigene10865_A	tetur14g01410	99.7	1667	5	0	1	1667	1669	3	0	3265
Unigene10866_A	tetur17g01500	99.48	1158	6	0	250	1407	1	1158	0	2248
Unigene10867_A	tetur16g02230	98.33	840	14	0	295	1134	927	88	0	1554
Unigene10868_A	tetur07g00160	96.4	222	8	0	1	222	3129	3350	1e-104	377
Unigene10869_A	tetur07g00160	93.43	213	14	0	1	213	4978	5190	6e-85	311
Unigene1086_A	tetur03g01500	98.9	453	5	0	42	494	1	453	0	858
Unigene10870_A	tetur238g00010	86.15	426	53	1	102	527	696	277	7e-105	379
Unigene10871_A	tetur08g06540	98.17	273	5	0	107	379	273	1	7e-142	502
Unigene10872_A	tetur07g01590	99.39	489	3	0	83	571	489	1	0	946
Unigene10873_A	tetur20g00200	98.11	423	8	0	108	530	1	423	0	775
Unigene10874_A	tetur30g02220	98.92	924	10	0	134	1057	924	1	0	1752
Unigene10875_A	tetur08g06560	97.04	1350	19	1	180	1508	1350	1	0	2391
Unigene10876_A	tetur14g01920	99.79	480	1	0	174	653	1	480	0	944
Unigene10877_A	tetur04g09160	98.78	411	5	0	152	562	1	411	0	775
Unigene10878_A	tetur17g03570	98.77	816	10	0	394	1209	1131	316	0	1538
Unigene10879_A	tetur17g03570	98.5	1131	17	0	394	1524	1131	1	0	2107
Unigene10880_A	tetur17g03570	98.5	1131	17	0	394	1524	1131	1	0	2107
Unigene10881_A	tetur13g04330	99.82	1110	2	0	1	1110	1110	1	0	2185
Unigene10882_A	tetur13g04330	99.86	726	1	0	1	726	1110	385	0	1431
Unigene10883_A	tetur13g04330	99.86	726	1	0	1	726	1110	385	0	1431
Unigene10884_A	tetur13g04330	99.86	725	1	0	1	725	1110	386	0	1429
Unigene10885_A	tetur08g05020	95.08	995	49	0	78	1072	5	999	0	1584
Unigene10886_A	tetur08g05020	95.48	995	45	0	78	1072	5	999	0	1616
Unigene10887_A	tetur13g03300	99.52	414	2	0	57	470	1	414	0	805
Unigene10888_A	tetur08g05840	81.54	130	24	0	264	393	154	25	2e-10	67.9
Unigene10889_A	tetur04g03050	99.24	1309	10	0	79	1387	1	1309	0	2516
Unigene1088_A	tetur09g02400	92.21	475	37	0	177	651	1459	985	0	648
Unigene10890_A	tetur11g00700	95.57	858	38	0	150	1007	10	867	0	1400
Unigene10891_A	tetur04g04860	98.19	276	5	0	221	496	276	1	2e-143	507
Unigene10892_A	tetur07g06020	97.93	1209	19	2	338	1540	1	1209	0	2190
Unigene10893_A	tetur60g00070	99.63	267	1	0	375	641	1	267	1e-147	521
Unigene10894_A	tetur01g14610	99.43	522	3	0	377	898	1	522	0	1011
Unigene10895_A	tetur09g02210	99.55	444	2	0	196	639	444	1	0	864
Unigene10896_A	tetur23g00380	98.74	713	9	0	1	713	3602	4314	0	1342
Unigene10897_A	tetur23g00380	97.93	483	10	0	3	485	3142	3624	0	878
Unigene10898_A	tetur23g00380	98.38	370	6	0	1	370	3602	3971	0	686
Unigene10899_A	tetur24g01240	97.8	2320	48	1	225	2541	1	2320	0	4191
Unigene1089_A	tetur14g01210	98.07	362	7	0	1	362	592	953	0	662
Unigene108_A	tetur17g03940	99.64	276	1	0	210	485	235	510	4e-153	539
Unigene10900_A	tetur01g07290	98.18	2422	44	0	172	2593	2496	75	0	4452
Unigene10901_A	tetur01g09780	97.59	953	23	0	1	953	527	1479	0	1707
Unigene10902_A	tetur21g00790	99.86	711	1	0	161	871	1	711	0	1402
Unigene10903_A	tetur03g08590	99.54	217	1	0	1	217	582	798	9e-118	422
Unigene10904_A	tetur10g01170	99.37	2553	16	0	39	2591	1	2553	0	4934
Unigene10905_A	tetur01g00940	97.78	765	17	0	128	892	765	1	0	1382
Unigene10906_A	tetur02g01030	98.72	312	4	0	64	375	312	1	2e-167	587
Unigene10911_A	tetur36g01340	99.24	3042	23	0	182	3223	1	3042	0	5848
Unigene10912_A	tetur05g06860	99.33	1191	8	0	68	1258	1	1191	0	2298
Unigene10913_A	tetur06g03380	90.72	431	40	0	154	584	499	69	2e-152	537
Unigene10914_A	tetur13g04330	99.69	324	1	0	1	324	1093	1416	0	634
Unigene10915_A	tetur13g03860	99.32	1629	11	0	225	1853	1629	1	0	3142
Unigene10916_A	tetur10g01200	97.93	2316	48	0	170	2485	2316	1	0	4211
Unigene10917_A	tetur38g00140	98.01	1910	29	2	1	1910	1253	3153	0	3483
Unigene10918_A	tetur06g03890	99.12	1476	13	0	911	2386	4338	2863	0	2823
Unigene10919_A	tetur06g03890	99.04	939	9	0	614	1552	3801	2863	0	1790
Unigene1091_A	tetur16g03100	98.63	219	3	0	1	219	1624	1842	8e-115	410
Unigene10920_A	tetur06g03890	99.29	562	4	0	911	1472	4338	3777	0	1082
Unigene10921_A	tetur21g01570	94.12	391	11	2	411	789	496	106	3e-170	597
Unigene10922_A	tetur30g01510	98.55	3525	36	2	2127	5651	3571	62	0	6593
Unigene10923_A	tetur30g01510	98.55	3510	36	2	959	4468	3556	62	0	6564
Unigene10924_A	tetur37g00480	99.26	806	6	0	2849	3654	806	1	0	1550
Unigene10925_A	tetur37g00480	99.26	806	6	0	1666	2471	806	1	0	1550
Unigene10926_A	tetur07g03460	98.72	549	7	0	157	705	1	549	0	1033
Unigene10927_A	tetur32g02090	98.33	418	4	1	1	418	189	603	0	769
Unigene10928_A	tetur19g02010	99.67	600	2	0	97	696	1	600	0	1174
Unigene10929_A	tetur05g05420	99.5	2197	8	1	364	2560	3888	1695	0	4264
Unigene1092_A	tetur05g07940	98.61	216	3	0	172	387	216	1	2e-112	404
Unigene10930_A	tetur02g03500	99.32	2348	16	0	2528	4875	2348	1	0	4528
Unigene10931_A	tetur05g05420	99.59	3891	13	1	364	4254	3888	1	0	7582
Unigene10932_A	tetur05g05420	99.5	2197	8	1	364	2560	3888	1695	0	4264
Unigene10933_A	tetur02g03500	98.82	845	10	0	239	1083	2338	1494	0	1596
Unigene10934_A	tetur02g03500	99.23	2338	18	0	239	2576	2338	1	0	4492
Unigene10935_A	tetur12g03850	94.74	704	28	1	691	1385	746	43	0	1110
Unigene10936_A	tetur05g05420	99.53	1717	8	0	239	1955	1717	1	0	3340
Unigene10937_A	tetur05g05420	99.71	1718	5	0	232	1949	1718	1	0	3366
Unigene10938_A	tetur02g03500	99.47	1517	8	0	48	1564	1517	1	0	2944
Unigene10939_A	tetur05g04400	98.3	411	7	0	99	509	1026	616	0	759
Unigene1093_A	tetur05g07940	100	28	0	0	172	199	216	189	9e-08	56
Unigene10940_A	tetur05g05600	91.77	1094	72	3	122	1200	1095	5	0	1461
Unigene10941_A	tetur05g01730	97.06	681	20	0	85	765	681	1	0	1191
Unigene10943_A	tetur19g00580	99.76	828	2	0	163	990	828	1	0	1626
Unigene10944_A	tetur20g01410	92.78	360	26	0	87	446	1	360	1e-143	507
Unigene10945_A	tetur20g01410	88.89	360	40	0	79	438	1	360	3e-110	396
Unigene10946_A	tetur07g00080	99.11	1689	10	1	116	1799	1	1689	0	3229
Unigene10947_A	tetur02g00740	99.57	1863	8	0	403	2265	1	1863	0	3630
Unigene10948_A	tetur02g00740	99.57	1863	8	0	349	2211	1	1863	0	3630
Unigene10949_A	tetur36g01010	99.81	1551	3	0	229	1779	1	1551	0	3051
Unigene10950_A	tetur36g01010	99.81	1551	3	0	113	1663	1	1551	0	3051
Unigene10951_A	tetur01g14030	99	897	9	0	211	1107	897	1	0	1707
Unigene10952_A	tetur14g00600	99.55	666	3	0	142	807	666	1	0	1296
Unigene10953_A	tetur02g03990	99.37	1260	8	0	164	1423	1	1260	0	2434
Unigene10954_A	tetur03g08470	100	90	0	0	172	261	1	90	1e-44	178
Unigene10955_A	tetur09g00680	99.49	3144	16	0	86	3229	1	3144	0	6106
Unigene10956_A	tetur01g03420	99.3	142	1	0	1	142	1134	1275	2e-73	274
Unigene10957_A	tetur15g00460	98.45	1419	22	0	435	1853	1	1419	0	2639
Unigene10958_A	tetur03g04010	99.7	2634	8	0	357	2990	1	2634	0	5158
Unigene10959_A	tetur19g02980	99.27	273	2	0	1	273	273	1	4e-149	525
Unigene1095_A	tetur02g01950	98.54	615	9	0	1	615	182	796	0	1148
Unigene10960_A	tetur01g09110	99.43	348	2	0	81	428	348	1	0	674
Unigene10961_A	tetur37g00130	98.75	1116	14	0	127	1242	1116	1	0	2101
Unigene10962_A	tetur01g11830	97.86	234	5	0	113	346	9	242	1e-118	424
Unigene10963_A	tetur01g11830	92.8	125	9	0	113	237	9	133	4e-44	176
Unigene10964_A	tetur23g00960	98.67	450	6	0	133	582	1	450	0	844
Unigene10965_A	tetur20g02710	98.71	1710	22	0	116	1825	1	1710	0	3215
Unigene10966_A	tetur11g04490	99.42	1713	10	0	1959	3671	1	1713	0	3316
Unigene10967_A	tetur11g04490	99.42	1713	10	0	1883	3595	1	1713	0	3316
Unigene10968_A	tetur11g04490	99.42	1713	10	0	1781	3493	1	1713	0	3316
Unigene10969_A	tetur11g04490	99.42	1713	10	0	1705	3417	1	1713	0	3316
Unigene1096_A	tetur01g13860	97.79	813	9	1	1	813	107	910	0	1477
Unigene10970_A	tetur11g04490	99.42	1713	10	0	1631	3343	1	1713	0	3316
Unigene10971_A	tetur11g04490	99.42	1713	10	0	1555	3267	1	1713	0	3316
Unigene10972_A	tetur11g04490	99.42	1713	10	0	1453	3165	1	1713	0	3316
Unigene10973_A	tetur11g04490	99.42	1713	10	0	1377	3089	1	1713	0	3316
Unigene10974_A	tetur07g01050	97.61	1214	29	0	67	1280	1635	422	0	2177
Unigene10975_A	tetur95g00040	98.37	1104	18	0	111	1214	1	1104	0	2046
Unigene10976_A	tetur30g00180	100	235	0	0	1	235	711	477	2e-131	466
Unigene10978_A	tetur24g01490	99.33	300	2	0	229	528	1	300	1e-164	579
Unigene10979_A	tetur06g03070	94.25	504	26	1	1	501	13	516	0	765
Unigene10980_A	tetur03g05970	99.6	1497	6	0	587	2083	1497	1	0	2920
Unigene10981_A	tetur02g02110	99.12	567	2	1	306	869	1	567	0	1080
Unigene10982_A	tetur01g09650	97.5	1643	32	1	357	1999	245	1878	0	2940
Unigene10983_A	tetur01g09650	97.5	1643	32	1	335	1977	245	1878	0	2940
Unigene10984_A	tetur08g03290	98.54	342	5	0	188	529	342	1	0	638
Unigene10985_A	tetur05g06960	98.7	1617	21	0	133	1749	1	1617	0	3039
Unigene10986_A	tetur15g03340	99.16	1903	16	0	118	2020	1911	9	0	3646
Unigene10987_A	tetur26g02760	94.23	468	15	1	209	676	456	1	0	728
Unigene10988_A	tetur10g04260	99.18	2695	19	1	112	2806	4392	1701	0	5164
Unigene10989_A	tetur03g03960	99.53	849	4	0	294	1142	849	1	0	1651
Unigene1098_A	tetur22g02330	97.31	483	7	1	290	766	699	217	0	856
Unigene10990_A	tetur03g04070	99.53	849	4	0	178	1026	849	1	0	1651
Unigene10991_A	tetur02g10090	99.37	1597	10	0	881	2477	1	1597	0	3087
Unigene10992_A	tetur02g10090	99.4	1659	10	0	881	2539	1	1659	0	3209
Unigene10993_A	tetur04g05260	99.74	1938	5	0	170	2107	1	1938	0	3802
Unigene10994_A	tetur01g03060	98.44	960	15	0	171	1130	1	960	0	1784
Unigene10995_A	tetur26g02350	99.24	529	4	0	143	671	529	1	0	1017
Unigene10996_A	tetur43g00240	98.8	2829	34	0	143	2971	1	2829	0	5338
Unigene10997_A	tetur04g07680	98.86	351	4	0	67	417	1	351	0	664
Unigene10998_A	tetur01g03990	99.23	3231	19	2	340	3564	1	3231	0	6199
Unigene10999_A	tetur01g03990	98.95	1432	12	1	340	1768	1	1432	0	2716
Unigene1099_A	tetur22g02330	97.19	463	7	1	292	748	679	217	0	817
Unigene109_A	tetur08g06630	97.96	147	3	0	196	342	147	1	3e-71	268
Unigene11001_A	tetur17g02020	98.53	614	9	0	111	724	614	1	0	1146
Unigene11002_A	tetur07g02860	97.03	1011	30	0	316	1326	1011	1	0	1766
Unigene11003_A	tetur109g00020	97.5	639	16	0	190	828	639	1	0	1140
Unigene11004_A	tetur109g00020	97.5	639	16	0	190	828	639	1	0	1140
Unigene11005_A	tetur148g00030	82.56	476	80	1	218	690	476	1	2e-75	281
Unigene11006_A	tetur130g00010	99.33	897	6	0	754	1650	897	1	0	1731
Unigene11007_A	tetur130g00010	99.33	897	6	0	350	1246	897	1	0	1731
Unigene11008_A	tetur16g00320	98.37	1413	23	0	62	1474	1413	1	0	2619
Unigene11009_A	tetur21g00060	98.04	561	11	0	206	766	561	1	0	1025
Unigene1100_A	tetur02g14040	82.61	92	16	0	289	380	406	315	2e-07	56
Unigene11011_A	tetur11g04400	98.7	1233	16	0	198	1430	1233	1	0	2317
Unigene11012_A	tetur10g03720	98.84	1546	18	0	84	1629	177	1722	0	2922
Unigene11013_A	tetur10g03720	98.84	1546	18	0	74	1619	177	1722	0	2922
Unigene11014_A	tetur01g08980	93.14	102	1	1	327	422	1	102	3e-35	149
Unigene11015_A	tetur01g15220	98.98	1077	8	1	108	1181	1	1077	0	2044
Unigene11016_A	tetur23g01980	99.43	1227	7	0	232	1458	19	1245	0	2377
Unigene11017_A	tetur23g01980	99.44	1245	7	0	69	1313	1	1245	0	2413
Unigene11018_A	tetur08g02660	98.46	846	13	0	69	914	1	846	0	1574
Unigene11020_A	tetur34g00700	98.42	2157	34	0	433	2589	2157	1	0	4006
Unigene11021_A	tetur03g03950	98.21	1228	22	0	99	1326	1	1228	0	2260
Unigene11022_A	tetur09g04920	95.64	482	21	0	258	739	482	1	0	789
Unigene11023_A	tetur03g02300	99.64	560	2	0	12	571	560	1	0	1094
Unigene11024_A	tetur43g00190	98.58	1554	16	2	346	1893	1554	1	0	2898
Unigene11025_A	tetur13g01510	99.04	837	8	0	125	961	1	837	0	1596
Unigene11026_A	tetur11g02570	98.02	810	10	1	321	1124	1	810	0	1481
Unigene11028_A	tetur01g03940	96.24	346	1	1	96	429	1	346	1e-170	597
Unigene11029_A	tetur23g02030	98.91	1566	17	0	1458	3023	19	1584	0	2970
Unigene11030_A	tetur03g05570	96.97	1351	41	0	9	1359	1351	1	0	2353
Unigene11031_A	tetur03g05560	98.15	378	7	0	101	478	378	1	0	694
Unigene11033_A	tetur02g13690	99.69	654	2	0	137	790	1	654	0	1281
Unigene11034_A	tetur02g13690	99.44	180	1	0	467	646	475	654	1e-95	349
Unigene11035_A	tetur02g03790	98.76	1047	13	0	190	1236	1047	1	0	1972
Unigene11036_A	tetur07g02820	98.83	855	10	0	62	916	855	1	0	1616
Unigene11037_A	tetur01g05940	99	2301	23	0	357	2657	2301	1	0	4379
Unigene11038_A	tetur01g05940	98.83	2301	27	0	315	2615	2301	1	0	4347
Unigene11039_A	tetur13g03690	99.06	1274	9	2	1	1271	5	1278	0	2416
Unigene1103_A	tetur13g03650	100	150	0	0	434	583	1	150	3e-80	297
Unigene11040_A	tetur26g02150	98.27	1911	33	0	131	2041	1	1911	0	3527
Unigene11041_A	tetur32g00170	99.64	549	2	0	81	629	549	1	0	1072
Unigene11042_A	tetur09g02070	99.71	1734	5	0	1	1734	1734	1	0	3398
Unigene11043_A	tetur32g00630	99.28	835	6	0	183	1017	3	837	0	1608
Unigene11044_A	tetur32g00630	99.28	837	6	0	65	901	1	837	0	1612
Unigene11045_A	tetur14g02470	98.96	1251	13	0	190	1440	1	1251	0	2377
Unigene11046_A	tetur01g06610	95.82	766	30	2	1	765	580	1344	0	1249
Unigene11047_A	tetur32g02327	97.63	843	20	0	152	994	843	1	0	1513
Unigene11048_A	tetur31g00340	97.13	348	10	0	140	487	348	1	1e-174	611
Unigene11049_A	tetur04g06430	95.14	432	21	0	167	598	1	432	0	690
Unigene11050_A	tetur02g05310	96.62	237	8	0	21	257	237	1	2e-113	406
Unigene11051_A	tetur03g02300	98.31	708	9	1	1	705	541	1248	0	1304
Unigene11052_A	tetur01g03980	100	43	0	0	1	43	52	94	7e-17	85.7
Unigene11053_A	tetur01g03980	91.67	48	4	0	1	48	11	58	3e-10	63.9
Unigene11054_A	tetur17g03630	98.96	1449	15	0	158	1606	1	1449	0	2753
Unigene11055_A	tetur17g00770	97.52	1168	23	1	1	1168	27	1188	0	2087
Unigene11056_A	tetur17g00770	96.9	387	12	0	87	473	802	1188	0	672
Unigene11057_A	tetur01g08590	98.69	1223	13	1	562	1781	1223	1	0	2294
Unigene11058_A	tetur01g14310	98.98	393	4	0	717	1109	393	1	0	747
Unigene11059_A	tetur11g04410	99.76	848	2	0	1	848	224	1071	0	1665
Unigene11060_A	tetur03g03130	99.56	450	2	0	87	536	1	450	0	876
Unigene11061_A	tetur15g01920	99.85	651	1	0	494	1144	651	1	0	1283
Unigene11062_A	tetur03g00500	97.97	2660	54	0	114	2773	2712	53	0	4845
Unigene11063_A	tetur38g00350	95.77	756	32	0	120	875	756	1	0	1245
Unigene11064_A	tetur38g00350	97.21	754	21	0	83	836	754	1	0	1328
Unigene11065_A	tetur10g01120	98.6	1851	26	0	1	1851	5129	3279	0	3463
Unigene11066_A	tetur21g00320	97.27	512	14	0	1	512	512	1	0	904
Unigene11067_A	tetur46g00100	94.59	37	2	0	219	255	1431	1395	2e-08	58
Unigene11068_A	tetur10g01970	97.89	522	11	0	1	522	382	903	0	948
Unigene11069_A	tetur10g01970	97.58	372	9	0	87	458	532	903	0	666
Unigene1106_A	tetur09g04060	88	100	2	1	499	598	123	34	8e-25	113
Unigene11070_A	tetur30g02080	94.95	891	45	0	1	891	891	1	0	1409
Unigene11071_A	tetur22g01740	97.29	295	8	0	1	295	295	1	1e-147	521
Unigene11072_A	tetur22g01740	97.29	295	8	0	1	295	295	1	1e-147	521
Unigene11073_A	tetur22g01740	97.29	295	8	0	1	295	295	1	1e-147	521
Unigene11074_A	tetur22g01740	97.29	295	8	0	1	295	295	1	1e-147	521
Unigene11075_A	tetur32g01300	98.79	1157	14	0	1	1157	614	1770	0	2183
Unigene11076_A	tetur10g04130	99.32	1030	7	0	1	1030	432	1461	0	1986
Unigene11077_A	tetur15g03720	98.91	825	9	0	89	913	825	1	0	1564
Unigene11082_A	tetur05g03450	99.19	615	5	0	158	772	1	615	0	1179
Unigene11083_A	tetur16g01200	98.63	2481	28	1	575	3049	2563	83	0	4651
Unigene11084_A	tetur16g01200	98.6	2795	33	1	126	2914	2877	83	0	5233
Unigene11085_A	tetur05g07420	92.11	469	35	1	1	469	61	527	1e-180	630
Unigene11086_A	tetur16g03470	88.13	219	17	1	65	274	1	219	3e-62	236
Unigene11087_A	tetur07g04670	98.47	981	15	0	71	1051	1	981	0	1826
Unigene11089_A	tetur20g02300	99.18	978	8	0	6	983	1	978	0	1875
Unigene11090_A	tetur19g03110	98.92	1760	19	0	1	1760	2428	669	0	3338
Unigene11091_A	tetur20g02630	97.4	461	12	0	1	461	26	486	0	819
Unigene11092_A	tetur01g00760	95.1	102	5	0	785	886	528	427	1e-39	163
Unigene11093_A	tetur04g07130	87.1	62	8	0	239	300	8915	8976	1e-08	60
Unigene11094_A	tetur02g05190	98.29	1168	20	0	1	1168	2518	1351	0	2157
Unigene11095_A	tetur05g09319	97.45	431	8	1	24	454	956	1383	0	763
Unigene11096_A	tetur05g09319	97.06	102	3	0	61	162	1282	1383	5e-45	178
Unigene11097_A	tetur19g03240	98.81	673	8	0	1	673	402	1074	0	1271
Unigene11099_A	tetur01g14400	99.72	1431	4	0	75	1505	1	1431	0	2805
Unigene110_A	tetur17g01770	97.83	414	9	0	1	414	501	88	0	749
Unigene11100_A	tetur12g02170	96.15	78	3	0	304	381	243	166	3e-30	131
Unigene11101_A	tetur08g00670	99.41	339	2	0	48	386	1	339	0	656
Unigene11102_A	tetur06g06140	98.76	2672	33	0	1	2672	3308	637	0	5035
Unigene11103_A	tetur10g02700	98.39	124	2	0	350	473	135	12	5e-60	230
Unigene11104_A	tetur04g02080	99.7	677	2	0	1	677	2439	1763	0	1326
Unigene11105_A	tetur04g02080	99.72	351	1	0	1	351	2439	2089	0	688
Unigene11106_A	tetur28g00440	98.8	747	9	0	1	747	688	1434	0	1409
Unigene11107_A	tetur19g00470	97.41	501	13	0	8	508	501	1	0	890
Unigene11108_A	tetur04g01180	98.32	955	16	0	76	1030	2292	1338	0	1766
Unigene11109_A	tetur04g06750	98.82	930	11	0	1	930	1064	1993	0	1756
Unigene1110_A	tetur05g09040	99.16	831	7	0	1	831	844	14	0	1592
Unigene11110_A	tetur07g07020	98.64	516	7	0	1	516	516	1	0	967
Unigene11112_A	tetur02g04490	96.65	477	16	0	66	542	1	477	0	819
Unigene11113_A	tetur26g01310	97.21	215	6	0	106	320	294	80	6e-105	379
Unigene11114_A	tetur02g06270	97.14	420	12	0	1	420	1627	1208	0	737
Unigene11116_A	tetur16g01720	98.65	1257	17	0	49	1305	1	1257	0	2357
Unigene11118_A	tetur05g06350	97.24	1305	36	0	144	1448	1359	55	0	2302
Unigene11119_A	tetur01g05540	97.45	314	8	0	103	416	1467	1154	3e-159	559
Unigene1111_A	tetur15g00500	100	61	0	0	1	61	498	558	5e-27	121
Unigene11120_A	tetur04g03740	99.44	1062	6	0	108	1169	1755	694	0	2058
Unigene11121_A	tetur07g02740	98.68	1134	15	0	1	1134	973	2106	0	2129
Unigene11122_A	tetur23g00450	98.84	173	2	0	1	173	2133	2305	2e-89	327
Unigene11123_A	tetur09g03150	97.97	1230	25	0	19	1248	1230	1	0	2240
Unigene11124_A	tetur06g01200	93.48	46	3	0	450	495	5	50	1e-10	67.9
Unigene11125_A	tetur06g01200	93.48	46	3	0	450	495	5	50	9e-11	67.9
Unigene11127_A	tetur06g01200	93.02	43	3	0	453	495	8	50	3e-09	61.9
Unigene11128_A	tetur06g01200	93.02	43	3	0	362	404	8	50	2e-09	61.9
Unigene1112_A	tetur01g09260	98.97	778	8	0	1	778	3031	2254	0	1479
Unigene11132_A	tetur17g01010	99.55	445	2	0	1	445	1854	2298	0	866
Unigene11133_A	tetur30g00590	91.65	623	37	2	1	620	39807	40417	0	833
Unigene11136_A	tetur24g00350	99.17	843	7	0	335	1177	1189	2031	0	1616
Unigene11137_A	tetur23g00760	86.11	576	71	2	25	600	1	567	5e-143	505
Unigene11138_A	tetur23g00760	94.62	465	19	1	25	489	1	459	0	726
Unigene11139_A	tetur18g02760	97.92	626	13	0	1	626	626	1	0	1138
Unigene1113_A	tetur09g05650	98.24	1532	27	0	1	1532	505	2036	0	2823
Unigene11140_A	tetur02g03440	97.86	888	19	0	139	1026	1	888	0	1610
Unigene11141_A	tetur11g02540	99.68	626	2	0	653	1278	433	1058	0	1225
Unigene11142_A	tetur27g00790	97.26	657	18	0	18	674	1	657	0	1160
Unigene11145_A	tetur08g00450	98.4	750	12	0	70	819	1	750	0	1392
Unigene11147_A	tetur08g03980	99.08	435	4	0	25	459	1	435	0	831
Unigene11148_A	tetur10g05520	100	30	0	0	438	467	232	203	8e-09	60
Unigene11149_A	tetur06g00290	98.57	1262	18	0	1	1262	1572	311	0	2359
Unigene11150_A	tetur06g00290	98.57	1332	19	0	1	1332	1572	241	0	2490
Unigene11151_A	tetur03g08390	95.42	502	17	1	48	549	932	437	0	815
Unigene11152_A	tetur03g08390	93.43	487	32	0	57	543	923	437	0	712
Unigene11153_A	tetur17g01650	99.58	2161	9	0	1	2161	2161	1	0	4212
Unigene11154_A	tetur03g09600	98.92	1574	17	0	8	1581	1578	5	0	2985
Unigene11157_A	tetur01g07410	99.13	459	4	0	26	484	220	678	0	878
Unigene11159_A	tetur31g01190	96.23	876	33	0	71	946	22	897	0	1475
Unigene11160_A	tetur07g03020	98.49	860	13	0	340	1199	1	860	0	1602
Unigene11161_A	tetur06g04700	99.81	1054	2	0	1	1054	1054	1	0	2074
Unigene11162_A	tetur10g03890	99.38	646	4	0	1	646	306	951	0	1249
Unigene11164_A	tetur32g00640	96.33	872	32	0	131	1002	1	872	0	1475
Unigene11165_A	tetur07g06860	98.54	2392	35	0	267	2658	2733	342	0	4464
Unigene11166_A	tetur28g00330	99.31	1011	7	0	118	1128	15	1025	0	1949
Unigene11167_A	tetur02g13920	95.16	310	15	0	252	561	16	325	9e-140	496
Unigene11169_A	tetur15g02570	98.95	287	3	0	349	635	20	306	1e-154	545
Unigene11170_A	tetur06g06480	98.36	915	15	0	40	954	915	1	0	1695
Unigene11171_A	tetur04g05990	94.75	934	22	4	91	1015	1344	429	0	1477
Unigene11172_A	tetur10g00360	99.08	1624	15	0	411	2034	1	1624	0	3100
Unigene11173_A	tetur11g02060	97.06	374	11	0	1	374	374	1	0	654
Unigene11174_A	tetur03g04440	98.01	1307	26	0	1	1307	9811	11117	0	2385
Unigene11175_A	tetur03g04440	95.05	101	5	0	49	149	11017	11117	2e-39	161
Unigene11178_A	tetur05g07030	98.9	363	4	0	34	396	1254	892	0	688
Unigene11179_A	tetur05g06300	84.59	305	47	0	246	550	1319	1015	1e-60	232
Unigene11180_A	tetur02g11390	96.77	31	1	0	1	31	31	1	2e-07	54
Unigene11182_A	tetur03g03920	98.96	1542	16	0	33	1574	1542	1	0	2930
Unigene11184_A	tetur11g01510	98.33	240	4	0	200	439	1	240	1e-124	444
Unigene11185_A	tetur29g01400	99.18	732	6	0	67	798	1	732	0	1403
Unigene11187_A	tetur07g01950	97.95	3313	59	1	17	3320	28	3340	0	6036
Unigene11188_A	tetur27g01030	91.47	129	11	0	124	252	567	439	6e-42	168
Unigene11189_A	tetur03g03010	97.82	780	8	2	207	986	1	771	0	1409
Unigene1118_A	tetur06g03880	99.19	372	3	0	249	620	1	372	0	714
Unigene11190_A	tetur03g06440	99.16	716	6	0	35	750	816	101	0	1372
Unigene11191_A	tetur07g04580	98.95	1520	16	0	182	1701	1	1520	0	2886
Unigene11192_A	tetur02g05640	99.36	624	4	0	1	624	532	1155	0	1205
Unigene11193_A	tetur04g06270	99.63	809	3	0	52	860	971	163	0	1580
Unigene11194_A	tetur10g02860	99.29	846	6	0	181	1026	1	846	0	1629
Unigene11195_A	tetur01g12680	98.72	390	5	0	1	390	390	1	0	733
Unigene11196_A	tetur04g00620	95.9	244	7	1	173	416	1	241	2e-111	400
Unigene11197_A	tetur18g01670	98.56	139	2	0	1	139	139	1	3e-69	260
Unigene11198_A	tetur23g01190	98.26	460	8	0	1936	2395	1620	1161	0	848
Unigene11199_A	tetur23g01220	91.99	1061	31	5	335	1365	1037	1	0	1487
Unigene1119_A	tetur10g02920	98.57	558	8	0	4	561	1933	2490	0	1043
Unigene11200_A	tetur22g02260	98.66	447	6	0	75	521	447	1	0	839
Unigene11202_A	tetur17g03170	100	27	0	0	377	403	1083	1057	5e-07	54
Unigene11203_A	tetur02g03060	97.13	279	8	0	1	279	2645	2367	1e-138	490
Unigene11204_A	tetur02g13650	95.74	141	6	0	66	206	1	141	4e-61	232
Unigene11205_A	tetur37g00780	100	504	0	0	82	585	16	519	0	999
Unigene11207_A	tetur37g00470	96.43	224	8	0	1	224	1577	1354	8e-106	381
Unigene11208_A	tetur01g00340	100	280	0	0	103	382	3090	2811	4e-158	555
Unigene11209_A	tetur01g16507	98.83	171	2	0	1	171	106	276	2e-88	323
Unigene1120_A	tetur34g00840	98.75	562	7	0	1	562	39	600	0	1059
Unigene11210_A	tetur14g01930	99.6	1259	5	0	1	1259	1259	1	0	2456
Unigene11211_A	tetur13g00030	99.56	687	3	0	180	866	1804	1118	0	1338
Unigene11212_A	tetur01g11940	98.24	2160	38	0	143	2302	1	2160	0	3981
Unigene11213_A	tetur05g01390	98.92	831	9	0	217	1047	1	831	0	1576
Unigene11214_A	tetur03g09540	99.39	1962	12	0	1057	3018	28	1989	0	3794
Unigene11215_A	tetur03g09540	99.41	1850	11	0	1057	2906	28	1877	0	3580
Unigene11216_A	tetur03g09540	99.39	1962	12	0	454	2415	28	1989	0	3794
Unigene11217_A	tetur03g09540	99.41	1850	11	0	454	2303	28	1877	0	3580
Unigene11218_A	tetur03g09530	100	132	0	0	29	160	1	132	3e-69	262
Unigene11219_A	tetur03g09540	100	131	0	0	454	584	28	158	6e-69	260
Unigene11222_A	tetur03g09060	93.25	2592	163	4	6	2594	1	2583	0	3735
Unigene11223_A	tetur03g09060	92.52	1926	132	4	6	1928	1	1917	0	2660
Unigene11224_A	tetur31g00570	98.38	309	5	0	58	366	13	321	2e-163	573
Unigene11226_A	tetur12g01220	98.74	717	9	0	211	927	1	717	0	1350
Unigene11227_A	tetur02g10950	97.72	263	6	0	172	434	1	263	1e-133	474
Unigene11228_A	tetur01g03330	99.19	495	4	0	124	618	1	495	0	950
Unigene11229_A	tetur06g00250	99.49	593	3	0	1	593	1061	469	0	1152
Unigene1122_A	tetur01g03580	98.98	685	7	0	1	685	45	729	0	1302
Unigene11230_A	tetur06g00250	99.49	593	3	0	1	593	1061	469	0	1152
Unigene11231_A	tetur11g05140	97.09	722	21	0	1	722	167	888	0	1265
Unigene11232_A	tetur01g08350	97.69	1388	29	1	1	1385	1388	1	0	2494
Unigene11233_A	tetur21g00890	98.83	342	4	0	139	480	2988	2647	0	646
Unigene11234_A	tetur03g04020	98.91	2197	15	2	1	2188	2520	324	0	4163
Unigene11235_A	tetur28g01690	98.43	318	5	0	399	716	79	396	3e-168	591
Unigene11236_A	tetur03g03340	99.08	325	3	0	212	536	2193	1869	1e-177	620
Unigene11237_A	tetur13g02420	97.77	358	8	0	1	358	858	1215	0	646
Unigene11238_A	tetur16g02620	98.44	1216	19	0	1	1216	1770	555	0	2260
Unigene1123_A	tetur19g02800	100	96	0	0	1124	1219	1	96	1e-47	190
Unigene11240_A	tetur08g07870	99.67	606	2	0	359	964	606	1	0	1185
Unigene11241_A	tetur35g01100	98.71	232	3	0	257	488	240	9	3e-122	436
Unigene11242_A	tetur02g04290	99.85	676	1	0	338	1013	676	1	0	1332
Unigene11243_A	tetur19g02430	96.58	732	25	0	3	734	2651	1920	0	1253
Unigene11244_A	tetur15g02280	98.47	391	6	0	1	391	858	468	0	728
Unigene11245_A	tetur03g01920	97.74	3367	76	0	1	3367	65	3431	0	6072
Unigene11246_A	tetur02g03290	98.9	1088	12	0	1	1088	112	1199	0	2062
Unigene11247_A	tetur06g03640	99.44	898	5	0	2	899	898	1	0	1740
Unigene11248_A	tetur06g03640	99.32	731	5	0	2	732	898	168	0	1409
Unigene11249_A	tetur06g03640	100	172	0	0	88	259	172	1	1e-93	341
Unigene11251_A	tetur01g01470	99.35	1852	12	0	1	1852	1852	1	0	3576
Unigene11252_A	tetur05g09325	93.59	1263	81	0	5	1267	1296	34	0	1861
Unigene11253_A	tetur01g11870	94.01	551	33	0	360	910	917	367	0	831
Unigene11254_A	tetur184g00030	94.27	576	33	0	1	576	606	31	0	880
Unigene11256_A	tetur22g00940	98.37	491	8	0	200	690	1	491	0	910
Unigene11257_A	tetur12g00100	99.44	538	3	0	326	863	1	538	0	1043
Unigene11259_A	tetur01g01470	100	143	0	0	1	143	1838	1980	3e-76	283
Unigene1125_A	tetur04g03410	100	130	0	0	117	246	146	17	1e-68	258
Unigene11260_A	tetur02g11710	98.74	2545	32	0	43	2587	1	2545	0	4791
Unigene11261_A	tetur31g00390	97.54	366	9	0	211	576	366	1	0	654
Unigene11262_A	tetur05g03890	98.64	955	13	0	1	955	3048	2094	0	1790
Unigene11264_A	tetur13g01620	99.4	335	2	0	1	335	495	829	0	648
Unigene11265_A	tetur01g09300	95.86	677	25	1	36	709	1482	806	0	1116
Unigene11266_A	tetur01g09300	92.76	677	35	2	36	698	1482	806	0	961
Unigene11267_A	tetur01g09300	95.64	1171	46	3	36	1202	1482	313	0	1897
Unigene11268_A	tetur01g09300	93.85	1171	56	4	36	1191	1482	313	0	1742
Unigene11269_A	tetur08g06090	100	753	0	0	296	1048	753	1	0	1493
Unigene1126_A	tetur10g05270	95.4	609	28	0	25	633	1	609	0	985
Unigene11270_A	tetur32g01970	96.12	903	35	0	366	1268	1	903	0	1513
Unigene11271_A	tetur32g01970	96.12	903	35	0	179	1081	1	903	0	1513
Unigene11273_A	tetur43g00320	98.15	378	7	0	391	768	1	378	0	694
Unigene11275_A	tetur12g04050	98.01	1408	23	1	420	1827	1	1403	0	2569
Unigene11277_A	tetur13g03110	93.4	530	35	0	1	530	530	1	0	773
Unigene11278_A	tetur13g03110	93.4	530	35	0	1	530	530	1	0	773
Unigene11279_A	tetur13g03110	97.49	279	7	0	383	661	786	508	1e-140	498
Unigene1127_A	tetur12g02000	99.06	425	4	0	123	547	1	425	0	811
Unigene11280_A	tetur13g03090	97.13	209	6	0	386	594	716	508	3e-101	367
Unigene11281_A	tetur04g07980	99.41	676	4	0	307	982	1398	723	0	1308
Unigene11282_A	tetur12g02420	99.14	348	3	0	130	477	3084	2737	0	666
Unigene11283_A	tetur04g00310	97.28	1138	10	3	717	1833	1138	1	0	2022
Unigene11284_A	tetur03g06450	97.58	786	19	0	1	786	486	1271	0	1407
Unigene11285_A	tetur13g02180	97.94	729	15	0	67	795	1	729	0	1326
Unigene11286_A	tetur05g05840	100	48	0	0	1	48	3589	3636	2e-19	95.6
Unigene11288_A	tetur02g04220	98.42	695	11	0	1	695	695	1	0	1291
Unigene11289_A	tetur14g03150	98.84	606	7	0	5	610	606	1	0	1146
Unigene1128_A	tetur26g01500	100	28	0	0	1	28	28	1	5e-08	56
Unigene11290_A	tetur02g06210	98.05	1330	26	0	1	1330	1059	2388	0	2430
Unigene11291_A	tetur02g05430	98.61	1509	21	0	261	1769	1509	1	0	2825
Unigene11292_A	tetur03g05460	98.52	2293	34	0	1	2293	1070	3362	0	4276
Unigene11293_A	tetur11g04380	100	25	0	0	278	302	1503	1479	5e-06	50.1
Unigene11294_A	tetur04g08560	98.65	1481	20	0	123	1603	1481	1	0	2777
Unigene11295_A	tetur03g01530	97.06	34	1	0	163	196	300	267	3e-09	60
Unigene11296_A	tetur01g05540	97.95	684	14	0	83	766	1	684	0	1245
Unigene11297_A	tetur10g04710	99.29	282	2	0	1	282	2085	2366	1e-154	543
Unigene11298_A	tetur14g02280	98.24	397	7	0	279	675	1294	898	0	731
Unigene11299_A	tetur01g02570	98.55	484	7	0	1	484	396	879	0	904
Unigene112_A	tetur17g00520	93.99	383	17	1	186	568	377	1	4e-165	579
Unigene11302_A	tetur06g04750	100	64	0	0	449	512	732	669	4e-29	127
Unigene11303_A	tetur08g05740	98.23	282	5	0	97	378	732	451	2e-147	519
Unigene11305_A	tetur08g03840	97.66	899	21	0	644	1542	899	1	0	1616
Unigene11307_A	tetur46g00100	84.79	309	47	0	605	913	800	1108	8e-63	240
Unigene11308_A	tetur46g00100	88.17	338	40	0	1	338	771	1108	3e-97	353
Unigene11309_A	tetur46g00100	87.55	249	31	0	1	249	771	1019	8e-66	248
Unigene11310_A	tetur12g01890	99.19	123	1	0	26	148	123	1	9e-62	236
Unigene11311_A	tetur08g01600	97.15	597	8	1	35	622	1	597	0	1057
Unigene11312_A	tetur09g01600	99.43	530	3	0	1	530	558	29	0	1027
Unigene11313_A	tetur17g01120	98.28	174	3	0	176	349	867	694	1e-87	321
Unigene11314_A	tetur09g01210	99.37	479	3	0	1627	2105	538	60	0	926
Unigene11315_A	tetur14g03380	98.69	229	3	0	323	551	79	307	3e-120	430
Unigene11316_A	tetur08g04490	98.6	356	5	0	217	572	14	369	0	666
Unigene11317_A	tetur13g00640	98.63	2186	27	1	1	2186	23	2205	0	4092
Unigene11319_A	tetur27g00660	99.8	1535	3	0	119	1653	1	1535	0	3019
Unigene1131_A	tetur25g00430	99	299	3	0	11	309	1	299	2e-162	569
Unigene11320_A	tetur28g00750	99.71	690	2	0	67	756	690	1	0	1352
Unigene11321_A	tetur02g07460	92.64	598	44	0	3	600	827	230	0	837
Unigene11322_A	tetur04g01050	97.2	1177	33	0	1	1177	1631	2807	0	2072
Unigene11323_A	tetur04g04650	99.51	822	4	0	1	822	194	1015	0	1598
Unigene11324_A	tetur11g04910	98.63	948	13	0	156	1103	1	948	0	1776
Unigene11325_A	tetur02g12580	87.94	572	55	5	679	1237	928	358	1e-160	565
Unigene11326_A	tetur26g01340	99.31	1896	13	0	61	1956	1	1896	0	3655
Unigene11327_A	tetur16g01710	99.18	1472	12	0	1	1472	1385	2856	0	2823
Unigene11328_A	tetur03g08490	98.59	780	11	0	30	809	1	780	0	1459
Unigene11329_A	tetur01g15570	99.49	792	4	0	227	1018	792	1	0	1538
Unigene11330_A	tetur30g00160	96.3	622	14	1	1	622	613	1	0	1059
Unigene11331_A	tetur12g03480	98.33	658	11	0	72	729	1	658	0	1217
Unigene11335_A	tetur07g05910	95.28	127	6	0	459	585	827	701	3e-52	204
Unigene11336_A	tetur07g05910	95.28	127	6	0	326	452	827	701	2e-52	204
Unigene11337_A	tetur02g08900	99.33	1050	7	0	147	1196	1	1050	0	2026
Unigene11339_A	tetur28g02550	97.25	655	18	0	1	655	655	1	0	1156
Unigene1133_A	tetur02g09630	97.67	86	2	0	1	86	864	949	1e-37	155
Unigene11340_A	tetur28g01450	98.58	3100	44	0	47	3146	1	3100	0	5796
Unigene11341_A	tetur06g00480	99.61	763	3	0	1050	1812	1272	510	0	1489
Unigene11342_A	tetur06g00490	100	336	0	0	75	410	717	382	0	666
Unigene11343_A	tetur29g01130	95.28	318	15	0	1	318	313	630	5e-145	511
Unigene11344_A	tetur09g03610	98.2	111	2	0	42	152	1	111	2e-52	204
Unigene11345_A	tetur30g00510	100	500	0	0	198	697	500	1	0	991
Unigene11346_A	tetur09g00170	98.93	2522	27	0	360	2881	1	2522	0	4785
Unigene11347_A	tetur06g06220	98.92	738	8	0	262	999	738	1	0	1400
Unigene11349_A	tetur22g02390	93.13	131	9	0	1565	1695	99	229	5e-47	188
Unigene1134_A	tetur08g05300	95.92	319	13	0	1	319	443	761	2e-150	529
Unigene11350_A	tetur22g02380	96.97	66	2	0	1	66	2072	2137	5e-25	115
Unigene11351_A	tetur19g01560	98.92	650	7	0	736	1385	1963	1314	0	1233
Unigene11352_A	tetur30g00680	98.57	279	4	0	811	1089	2386	2664	2e-147	521
Unigene11353_A	tetur15g02060	99.42	863	5	0	1	863	863	1	0	1671
Unigene11355_A	tetur17g00190	99.22	899	7	0	1	899	3163	2265	0	1727
Unigene11356_A	tetur16g03490	90.06	161	16	0	3	163	2834	2994	4e-49	192
Unigene11357_A	tetur04g05880	96.31	758	28	0	1	758	758	1	0	1281
Unigene11358_A	tetur04g08130	98.75	2391	21	2	212	2599	1	2385	0	4500
Unigene11359_A	tetur01g15740	99.65	569	2	0	1	569	896	1464	0	1112
Unigene1135_A	tetur04g05130	99.19	743	6	0	1	743	363	1105	0	1425
Unigene11360_A	tetur24g01530	98.66	2162	29	0	2	2163	11444	9283	0	4056
Unigene11362_A	tetur21g00630	98.8	3423	41	0	2	3424	4361	939	0	6460
Unigene11363_A	tetur08g05790	91.63	442	37	0	1	442	773	332	3e-166	583
Unigene11364_A	tetur29g00660	99.92	1253	1	0	81	1333	597	1849	0	2476
Unigene11365_A	tetur06g05710	97.64	1103	17	1	91	1184	1	1103	0	1988
Unigene11366_A	tetur06g05710	94.62	260	5	1	59	309	844	1103	3e-115	412
Unigene11367_A	tetur20g01020	98.51	404	6	0	2	405	1669	2072	0	753
Unigene11369_A	tetur04g09210	98.79	414	5	0	132	545	1	414	0	781
Unigene1136_A	tetur586g00020	98.84	172	2	0	163	334	882	711	6e-89	325
Unigene11370_A	tetur02g06630	98.15	486	9	0	89	574	1	486	0	892
Unigene11371_A	tetur11g01340	98.31	1535	23	1	83	1614	1	1535	0	2833
Unigene11372_A	tetur02g13090	98.46	648	10	0	158	805	1	648	0	1205
Unigene11373_A	tetur02g03010	99.07	216	2	0	1	216	216	1	3e-115	412
Unigene11374_A	tetur34g01010	98.94	1041	11	0	1	1041	391	1431	0	1976
Unigene11375_A	tetur15g03100	98.68	1285	17	0	1	1285	2365	1081	0	2413
Unigene11376_A	tetur24g01850	97.87	516	11	0	400	915	516	1	0	936
Unigene11377_A	tetur11g00540	96.83	1827	58	0	111	1937	1	1827	0	3162
Unigene11378_A	tetur05g00150	98.7	462	6	0	1	462	1991	2452	0	868
Unigene11379_A	tetur13g04110	97.97	543	11	0	75	617	831	289	0	989
Unigene1137_A	tetur04g09070	97.63	1391	33	0	1	1391	1391	1	0	2496
Unigene11381_A	tetur13g03370	99.11	1455	13	0	1	1455	1455	1	0	2781
Unigene11382_A	tetur02g13650	96.62	414	14	0	70	483	537	124	0	710
Unigene11384_A	tetur02g06630	98.97	583	6	0	1	583	1075	493	0	1108
Unigene11386_A	tetur01g15230	98.4	1628	26	0	209	1836	1	1628	0	3021
Unigene11387_A	tetur23g00590	97.78	1354	30	0	181	1534	2163	810	0	2446
Unigene11388_A	tetur28g02070	98.07	1142	19	1	25	1166	1	1139	0	2085
Unigene11389_A	tetur01g00400	99.37	479	3	0	1	479	479	1	0	926
Unigene1138_A	tetur04g07390	100	482	0	0	635	1116	1253	1734	0	955
Unigene11390_A	tetur36g00420	99	301	3	0	155	455	1	301	2e-163	573
Unigene11391_A	tetur26g02802	95.59	204	9	0	26	229	660	457	2e-91	333
Unigene11392_A	tetur29g00900	87.62	105	2	1	346	439	31	135	4e-26	117
Unigene11393_A	tetur07g05150	98.59	780	11	0	159	938	1	780	0	1459
Unigene11394_A	tetur07g05150	98.57	767	11	0	159	925	1	767	0	1433
Unigene11396_A	tetur32g00930	99.02	1023	10	0	1	1023	1530	508	0	1949
Unigene11397_A	tetur32g00930	98.98	882	9	0	1	882	1530	649	0	1677
Unigene11398_A	tetur08g07450	98.6	641	9	0	1	641	1916	2556	0	1199
Unigene11399_A	tetur06g00300	98.68	531	7	0	1	531	14830	14300	0	997
Unigene1139_A	tetur02g13050	98.07	414	8	0	1	414	734	321	0	757
Unigene11400_A	tetur05g00380	98.04	510	10	0	5	514	106	615	0	932
Unigene11402_A	tetur05g03480	98.46	1622	25	0	160	1781	3414	1793	0	3017
Unigene11403_A	tetur06g01430	97.55	368	9	0	1	368	491	858	0	658
Unigene11404_A	tetur02g01850	97.38	534	14	0	291	824	534	1	0	948
Unigene11405_A	tetur10g00510	98.69	993	13	0	61	1053	993	1	0	1865
Unigene11406_A	tetur10g03450	98.44	1796	28	0	1	1796	770	2565	0	3338
Unigene11407_A	tetur13g02960	97.95	439	9	0	334	772	36	474	0	799
Unigene11408_A	tetur22g02430	99.19	984	8	0	161	1144	984	1	0	1887
Unigene11409_A	tetur02g05150	97.12	1110	32	0	95	1204	1377	268	0	1947
Unigene1140_A	tetur21g02610	99.44	354	2	0	202	555	49	402	0	686
Unigene11411_A	tetur09g06060	99.04	1661	16	0	35	1695	2421	761	0	3166
Unigene11412_A	tetur30g00300	98.66	522	7	0	96	617	1	522	0	979
Unigene11413_A	tetur07g06090	99.38	642	4	0	85	726	2787	2146	0	1241
Unigene11414_A	tetur04g03000	99.08	1741	16	0	1	1741	147	1887	0	3324
Unigene11415_A	tetur10g03870	98.1	210	4	0	66	275	1	210	1e-106	385
Unigene11416_A	tetur02g11600	97.68	993	23	0	336	1328	3009	2017	0	1786
Unigene11417_A	tetur08g02350	99.73	369	1	0	1	369	369	1	0	724
Unigene11418_A	tetur08g05750	99.43	523	3	0	412	934	651	129	0	1013
Unigene11420_A	tetur04g07020	98.05	462	9	0	118	579	1	462	0	844
Unigene11421_A	tetur26g00420	95.01	401	13	1	1	401	605	212	0	640
Unigene11422_A	tetur26g00420	97.24	290	8	0	98	387	501	212	6e-145	511
Unigene11423_A	tetur17g00150	99.36	622	4	0	1	622	708	1329	0	1201
Unigene11425_A	tetur31g01180	98.08	261	5	0	42	302	1	261	6e-135	478
Unigene11426_A	tetur11g01050	94.83	1393	72	0	1	1393	1500	2892	0	2190
Unigene11427_A	tetur11g01050	97.17	283	8	0	1	283	1500	1782	1e-140	498
Unigene11428_A	tetur11g00910	97.07	376	11	0	1	376	582	957	0	658
Unigene11429_A	tetur31g01230	98.32	834	14	0	1	834	834	1	0	1542
Unigene1142_A	tetur03g00080	99.7	669	2	0	1	669	1082	1750	0	1310
Unigene11430_A	tetur01g12590	97.51	2051	51	0	1	2051	266	2316	0	3661
Unigene11431_A	tetur04g05690	95.27	296	14	0	42	337	1	296	3e-134	476
Unigene11432_A	tetur05g03360	98.72	392	5	0	1	392	1259	1650	0	737
Unigene11433_A	tetur08g02140	99.68	315	1	0	78	392	315	1	1e-176	617
Unigene11434_A	tetur13g02260	97.9	238	5	0	37	274	1	238	8e-121	432
Unigene11435_A	tetur25g01620	99.33	745	5	0	79	823	786	42	0	1437
Unigene11436_A	tetur09g02290	99.6	750	3	0	49	798	750	1	0	1463
Unigene11437_A	tetur02g13070	91.11	225	20	0	6	230	575	799	9e-78	287
Unigene11438_A	tetur34g00850	97.38	573	15	0	99	671	1	573	0	1017
Unigene11439_A	tetur24g00400	98.86	351	4	0	93	443	351	1	0	664
Unigene1143_A	tetur26g00920	97.56	246	6	0	1	246	246	1	2e-123	440
Unigene11440_A	tetur17g01520	99.19	859	7	0	98	956	2346	1488	0	1647
Unigene11441_A	tetur07g01010	99.17	969	8	0	1	969	969	1	0	1857
Unigene11442_A	tetur16g01110	93.68	348	22	0	28	375	1	348	3e-146	515
Unigene11443_A	tetur17g01390	92.82	181	1	1	1	169	186	6	3e-72	270
Unigene11444_A	tetur11g05990	99.55	886	4	0	1	886	3547	4432	0	1725
Unigene11445_A	tetur87g00040	81.82	473	71	2	60	526	74	537	8e-71	266
Unigene11446_A	tetur24g02200	97.16	1443	17	2	7	1449	1455	37	0	2563
Unigene11448_A	tetur01g12170	96.27	322	12	0	1	322	348	27	4e-154	543
Unigene11449_A	tetur04g03890	98.27	808	14	0	959	1766	1767	960	0	1491
Unigene1144_A	tetur01g01780	98.96	193	2	0	456	648	52	244	7e-101	367
Unigene11450_A	tetur04g03900	98.21	615	11	0	106	720	615	1	0	1132
Unigene11451_A	tetur04g03890	97.86	654	14	0	119	772	1613	960	0	1185
Unigene11452_A	tetur04g09495	99.3	429	3	0	1	429	429	1	0	827
Unigene11453_A	tetur36g01180	98.14	808	15	0	1	808	123	930	0	1483
Unigene11454_A	tetur20g01300	99.39	815	5	0	2	816	1778	964	0	1576
Unigene11455_A	tetur03g02410	97.35	1056	25	1	435	1490	1	1053	0	1867
Unigene11456_A	tetur26g01390	98.65	3104	42	0	1	3104	1897	5000	0	5820
Unigene11457_A	tetur02g10730	99.18	613	5	0	819	1431	1857	1245	0	1176
Unigene11458_A	tetur03g01160	98.62	727	10	0	1	727	2109	1383	0	1362
Unigene11459_A	tetur02g01660	99.57	1170	5	0	72	1241	1170	1	0	2280
Unigene1145_A	tetur01g01780	98.36	244	4	0	260	503	1	244	1e-126	452
Unigene11460_A	tetur23g00970	100	181	0	0	2	182	181	1	5e-99	359
Unigene11461_A	tetur01g01940	99.1	2120	19	0	68	2187	1	2120	0	4052
Unigene11462_A	tetur12g01400	97.29	960	26	0	1	960	885	1844	0	1697
Unigene11463_A	tetur32g00930	98.88	1429	16	0	1	1429	1515	2943	0	2706
Unigene11464_A	tetur32g00930	98.55	757	11	0	259	1015	2187	2943	0	1413
Unigene11465_A	tetur32g00930	98.54	547	8	0	70	616	2397	2943	0	1021
Unigene11466_A	tetur06g04780	98.07	311	6	0	61	371	1	311	3e-162	569
Unigene11467_A	tetur12g03720	97.73	396	9	0	114	509	396	1	0	714
Unigene11468_A	tetur32g00290	98.44	703	11	0	1	703	213	915	0	1306
Unigene11469_A	tetur21g01770	98.77	489	6	0	151	639	489	1	0	922
Unigene1146_A	tetur10g01360	98.18	769	14	0	83	851	1131	363	0	1413
Unigene11470_A	tetur03g01850	97.83	600	13	0	104	703	1	600	0	1086
Unigene11471_A	tetur12g01280	100	31	0	0	422	452	1	31	3e-09	61.9
Unigene11473_A	tetur14g03340	98.82	255	3	0	145	399	1	255	6e-136	482
Unigene11475_A	tetur01g11170	99.85	669	1	0	469	1137	1	669	0	1318
Unigene11476_A	tetur27g01050	98	50	1	0	468	517	84	35	2e-18	91.7
Unigene11477_A	tetur16g00760	99.25	402	3	0	80	481	1	402	0	773
Unigene11478_A	tetur25g00400	95.14	576	28	0	1	576	4230	3655	0	920
Unigene11479_A	tetur01g08390	100	44	0	0	261	304	2034	1991	2e-17	87.7
Unigene11480_A	tetur05g06440	92.51	374	28	0	28	401	484	111	2e-147	519
Unigene11481_A	tetur12g01350	100	319	0	0	1	319	247	565	0	632
Unigene11482_A	tetur01g02570	97.56	82	2	0	1	82	82	1	6e-35	147
Unigene11485_A	tetur21g00100	98.14	1561	23	1	1	1561	1431	2985	0	2866
Unigene11487_A	tetur35g00450	99.04	732	7	0	13	744	1782	1051	0	1396
Unigene11488_A	tetur02g04870	98.83	1532	18	0	297	1828	1532	1	0	2894
Unigene11489_A	tetur07g04180	99.13	1717	15	0	1	1717	1717	1	0	3285
Unigene1148_A	tetur01g13100	87.16	584	66	1	57	640	575	1	1e-162	571
Unigene11490_A	tetur09g03010	99.3	714	5	0	66	779	927	214	0	1376
Unigene11491_A	tetur26g02500	99.21	1397	11	0	1	1397	1397	1	0	2682
Unigene11492_A	tetur12g03490	83.22	143	23	1	139	280	69	211	8e-17	85.7
Unigene11493_A	tetur05g03960	98.57	350	5	0	1	350	1463	1812	0	654
Unigene11494_A	tetur11g00610	97.93	483	10	0	140	622	483	1	0	878
Unigene11495_A	tetur17g02590	98.74	159	1	1	177	334	1	159	5e-78	291
Unigene11496_A	tetur09g01630	100	47	0	0	1	47	660	706	6e-19	93.7
Unigene11497_A	tetur05g01130	94.73	569	30	0	1	569	821	1389	0	890
Unigene11498_A	tetur03g08770	97.62	2265	30	3	1	2247	756	3014	0	4080
Unigene11499_A	tetur02g05070	99.62	526	2	0	9	534	652	127	0	1027
Unigene1149_A	tetur02g08100	100	82	0	0	1	82	82	1	5e-40	163
Unigene11500_A	tetur20g00020	96.81	376	12	0	1	376	376	1	0	650
Unigene11501_A	tetur17g02050	99.34	458	3	0	171	628	1	458	0	884
Unigene11502_A	tetur04g01660	99.13	231	2	0	1	231	2119	2349	4e-124	442
Unigene11504_A	tetur06g04680	97.18	425	12	0	37	461	1	425	0	747
Unigene11505_A	tetur01g02400	96.91	614	13	1	535	1148	608	1	0	1068
Unigene11506_A	tetur12g02490	98.17	1529	28	0	1	1529	1529	1	0	2809
Unigene11507_A	tetur02g12670	98.27	1387	24	0	1	1387	1396	10	0	2559
Unigene11508_A	tetur02g12670	98.16	1085	20	0	1	1085	1396	312	0	1992
Unigene11509_A	tetur15g03670	97.97	1132	23	0	133	1264	1	1132	0	2062
Unigene1150_A	tetur27g01320	99.22	386	3	0	12	397	736	351	0	741
Unigene11511_A	tetur31g00080	96.88	256	8	0	1	256	491	236	7e-125	444
Unigene11512_A	tetur10g00330	98.96	193	2	0	298	490	1	193	3e-101	367
Unigene11513_A	tetur09g03260	98.44	1791	28	0	27	1817	1791	1	0	3328
Unigene11514_A	tetur01g04050	96.98	662	20	0	117	778	1	662	0	1154
Unigene11515_A	tetur27g00030	100	204	0	0	1	204	406	609	6e-113	404
Unigene11516_A	tetur15g01690	98.19	276	5	0	278	553	1556	1281	1e-143	507
Unigene11517_A	tetur01g13520	98.16	652	12	0	1	652	2489	3140	0	1197
Unigene11518_A	tetur09g06110	97.92	48	1	0	412	459	243	196	4e-17	87.7
Unigene11519_A	tetur02g00620	99.46	745	4	0	1	745	43	787	0	1445
Unigene11520_A	tetur03g01830	93.1	1159	80	0	1	1159	231	1389	0	1663
Unigene11521_A	tetur11g03140	92.11	38	3	0	348	385	343	380	4e-06	52
Unigene11525_A	tetur04g04930	96.83	567	18	0	94	660	909	343	0	981
Unigene11526_A	tetur04g04930	96.03	403	16	0	70	472	745	343	0	672
Unigene11527_A	tetur09g05720	95.77	614	26	0	1	614	55	668	0	1011
Unigene11528_A	tetur09g05720	90.48	399	36	2	1	398	55	452	1e-133	474
Unigene1152_A	tetur03g06220	98.04	560	8	1	463	1022	988	1544	0	1019
Unigene11530_A	tetur27g02000	99.1	221	2	0	1	221	266	486	5e-118	422
Unigene11531_A	tetur14g00910	98.41	440	7	0	403	842	29	468	0	817
Unigene11532_A	tetur14g00910	98.41	440	7	0	395	834	29	468	0	817
Unigene11533_A	tetur14g00910	98.5	468	7	0	301	768	1	468	0	872
Unigene11534_A	tetur14g00910	98.5	468	7	0	293	760	1	468	0	872
Unigene11535_A	tetur11g05720	97.65	85	2	0	1	85	456	540	3e-37	153
Unigene11536_A	tetur20g02900	98.98	492	5	0	101	592	1	492	0	936
Unigene11537_A	tetur16g00720	97.95	1368	28	0	65	1432	1	1368	0	2490
Unigene11538_A	tetur16g02680	98.59	995	14	0	1	995	995	1	0	1861
Unigene11541_A	tetur27g00770	98.79	3625	44	0	1	3625	3780	156	0	6837
Unigene11542_A	tetur05g05730	96.79	655	21	0	1	655	19	673	0	1132
Unigene11543_A	tetur09g01020	95.15	227	11	0	1	227	230	4	3e-100	363
Unigene11546_A	tetur27g01700	97.6	1210	20	2	82	1291	1221	21	0	2167
Unigene11548_A	tetur02g13050	92.71	96	7	0	1	96	1882	1977	8e-32	135
Unigene11549_A	tetur14g00890	98.39	872	14	0	151	1022	1	872	0	1618
Unigene11551_A	tetur08g03430	98.15	433	8	0	47	479	564	132	0	795
Unigene11552_A	tetur12g02670	95.24	483	23	0	2	484	1451	969	0	775
Unigene11553_A	tetur02g12590	97.56	1024	25	0	1	1024	900	1923	0	1832
Unigene11554_A	tetur16g00410	99.44	356	2	0	1	356	3287	2932	0	690
Unigene11555_A	tetur02g12430	87.1	248	32	0	595	842	1304	1551	3e-62	238
Unigene11557_A	tetur18g00240	100	25	0	0	1	25	2577	2553	4e-06	50.1
Unigene11559_A	tetur14g03300	97.18	248	7	0	293	540	1	248	4e-122	436
Unigene11561_A	tetur10g03090	99.78	462	1	0	1	462	1168	1629	0	908
Unigene11562_A	tetur32g01690	99.34	1361	9	0	1	1361	1361	1	0	2627
Unigene11563_A	tetur27g00400	98.87	972	11	0	129	1100	972	1	0	1840
Unigene11564_A	tetur27g00970	98.29	1579	27	0	53	1631	1579	1	0	2916
Unigene11565_A	tetur08g00480	97.65	639	15	0	121	759	1604	966	0	1148
Unigene11566_A	tetur12g02000	99.14	1164	10	0	1	1164	2611	3774	0	2228
Unigene11567_A	tetur02g11070	97.74	443	10	0	1	443	1891	2333	0	799
Unigene11568_A	tetur31g00190	99.14	1626	14	0	444	2069	4892	3267	0	3112
Unigene11569_A	tetur14g01370	98.81	1518	18	0	170	1687	1	1518	0	2866
Unigene1156_A	tetur28g00240	98.69	764	10	0	1	764	580	1343	0	1435
Unigene11570_A	tetur14g01370	98.77	1304	16	0	48	1351	215	1518	0	2458
Unigene11571_A	tetur02g10110	98.08	1043	20	0	1	1043	1047	5	0	1909
Unigene11573_A	tetur46g00100	96.88	32	1	0	350	381	1394	1363	1e-07	56
Unigene11574_A	tetur46g00100	81.21	149	28	0	43	191	1511	1363	2e-13	73.8
Unigene11575_A	tetur02g14721	94.48	308	17	0	1	308	1235	1542	3e-134	476
Unigene11576_A	tetur08g01020	99.46	367	2	0	27	393	367	1	0	712
Unigene11577_A	tetur24g00370	99.56	225	1	0	87	311	1	225	7e-123	438
Unigene11578_A	tetur01g02460	99.6	501	2	0	136	636	51	551	0	977
Unigene11579_A	tetur07g00460	99.3	714	5	0	1	714	714	1	0	1376
Unigene1157_A	tetur28g00240	100	154	0	0	62	215	1190	1343	3e-83	305
Unigene11580_A	tetur16g02620	97.09	895	26	0	1	895	6489	7383	0	1568
Unigene11581_A	tetur37g00450	99.49	591	3	0	148	738	2103	2693	0	1148
Unigene11582_A	tetur20g02880	98.57	1893	27	0	244	2136	1	1893	0	3538
Unigene11583_A	tetur33g01420	98.62	1376	19	0	1	1376	1376	1	0	2577
Unigene11586_A	tetur16g02430	98.45	386	6	0	1	386	386	1	0	718
Unigene11587_A	tetur16g02430	98.45	386	6	0	1	386	386	1	0	718
Unigene11588_A	tetur16g02430	98.45	386	6	0	1	386	386	1	0	718
Unigene11589_A	tetur41g00280	99.33	894	6	0	1	894	913	20	0	1725
Unigene11590_A	tetur18g01640	98.98	1179	12	0	1	1179	2512	1334	0	2242
Unigene11592_A	tetur30g00590	95.73	398	17	0	1	398	33501	33104	0	654
Unigene11593_A	tetur26g01410	100	50	0	0	155	204	55	6	8e-21	99.6
Unigene11595_A	tetur23g02452	98.33	538	9	0	1	538	2790	3327	0	995
Unigene11596_A	tetur23g02452	97.59	249	6	0	64	312	3079	3327	2e-125	446
Unigene11597_A	tetur01g02200	98.29	700	12	0	1	700	873	1572	0	1292
Unigene11598_A	tetur11g03090	97.6	541	13	0	574	1114	1329	789	0	969
Unigene11599_A	tetur11g03090	98.72	859	11	0	171	1029	1647	789	0	1616
Unigene1159_A	tetur10g01410	98.29	293	5	0	1	293	2901	3193	5e-154	541
Unigene11600_A	tetur55g00170	97.94	389	8	0	1	389	389	1	0	708
Unigene11601_A	tetur23g01530	99.83	597	1	0	369	965	597	1	0	1176
Unigene11602_A	tetur23g01530	99.83	597	1	0	369	965	597	1	0	1176
Unigene11603_A	tetur14g02140	97.42	504	13	0	292	795	504	1	0	896
Unigene11604_A	tetur05g02800	97.86	280	6	0	178	457	321	42	1e-143	507
Unigene11605_A	tetur26g01970	100	251	0	0	1	251	436	186	5e-141	498
Unigene11607_A	tetur01g11920	99.09	657	6	0	200	856	657	1	0	1255
Unigene11608_A	tetur29g01470	98.55	69	1	0	197	265	1	69	2e-29	129
Unigene11609_A	tetur12g03430	99.82	1648	3	0	251	1898	1	1648	0	3243
Unigene11610_A	tetur12g03430	99.82	1698	3	0	251	1948	1	1698	0	3342
Unigene11611_A	tetur29g01440	98.26	633	5	1	1	633	2884	3510	0	1170
Unigene11613_A	tetur08g00480	98.06	620	12	0	1	620	253	872	0	1134
Unigene11614_A	tetur02g01520	94.9	1236	36	2	98	1306	1236	1	0	1984
Unigene11615_A	tetur02g10120	97.18	71	2	0	115	185	35	105	2e-28	125
Unigene11616_A	tetur26g01770	99.51	206	1	0	1	206	711	916	8e-112	400
Unigene11617_A	tetur02g12530	100	27	0	0	125	151	1448	1422	3e-07	54
Unigene11618_A	tetur14g00140	98.81	505	6	0	5	509	1816	2320	0	954
Unigene11619_A	tetur16g00360	98.63	3003	41	0	168	3170	3003	1	0	5628
Unigene1161_A	tetur41g00160	98.09	262	5	0	1	262	959	1220	1e-135	480
Unigene11620_A	tetur01g15140	94.57	276	3	1	1	276	264	1	3e-124	442
Unigene11621_A	tetur01g10120	98.87	2216	25	0	4	2219	1	2216	0	4195
Unigene11622_A	tetur01g10120	98.81	2612	31	0	4	2615	1	2612	0	4932
Unigene11623_A	tetur05g00400	99.37	2053	13	0	1	2053	2053	1	0	3967
Unigene11624_A	tetur05g00400	99.08	874	8	0	1	874	2053	1180	0	1669
Unigene11625_A	tetur05g08630	98.79	497	6	0	1	497	1041	1537	0	938
Unigene11626_A	tetur07g07030	98.45	840	13	0	89	928	1140	301	0	1562
Unigene11629_A	tetur01g02000	98.72	1959	10	2	61	2004	1959	1	0	3695
Unigene11630_A	tetur01g07340	98.98	589	6	0	1	589	261	849	0	1120
Unigene11631_A	tetur27g02130	100	145	0	0	287	431	4176	4032	2e-77	287
Unigene11632_A	tetur29g00160	98.75	1203	15	0	293	1495	1	1203	0	2266
Unigene11635_A	tetur10g01460	97.28	368	10	0	1	368	368	1	0	650
Unigene11636_A	tetur01g14040	98.18	771	14	0	15	785	1038	268	0	1417
Unigene11637_A	tetur02g10230	98.98	1079	11	0	1	1079	4215	3137	0	2052
Unigene11638_A	tetur04g09060	99.46	742	4	0	23	764	1239	498	0	1439
Unigene1163_A	tetur49g00060	100	47	0	0	178	224	1	47	3e-19	93.7
Unigene11640_A	tetur08g05070	98.84	516	6	0	202	717	1	516	0	975
Unigene11641_A	tetur16g01640	99.37	1917	9	1	188	2101	3966	2050	0	3701
Unigene11642_A	tetur10g03020	99.07	646	6	0	1	646	646	1	0	1233
Unigene11643_A	tetur10g03020	99.07	646	6	0	1	646	646	1	0	1233
Unigene11644_A	tetur21g02790	98.45	1351	21	0	231	1581	99	1449	0	2512
Unigene11645_A	tetur11g02750	98.98	393	4	0	10	402	921	1313	0	747
Unigene11646_A	tetur17g02540	98.05	1182	23	0	151	1332	1	1182	0	2161
Unigene11647_A	tetur01g03910	97.79	768	14	1	112	876	1	768	0	1384
Unigene11648_A	tetur13g01000	99.59	1478	6	0	1	1478	721	2198	0	2882
Unigene11649_A	tetur31g01370	98.46	1558	24	0	169	1726	1620	63	0	2898
Unigene1164_A	tetur33g01590	96.79	468	15	0	76	543	1	468	0	809
Unigene11650_A	tetur11g05550	95.71	513	22	0	768	1280	1128	616	0	842
Unigene11651_A	tetur01g00340	97.89	1707	33	1	1	1707	1129	2832	0	3094
Unigene11652_A	tetur31g01910	97.01	502	15	0	1	502	66	567	0	876
Unigene11653_A	tetur08g07950	97.01	167	5	0	1	167	1471	1637	1e-78	291
Unigene11654_A	tetur09g01780	99.31	290	2	0	2	291	290	1	2e-159	559
Unigene11655_A	tetur16g00230	99.08	326	3	0	139	464	627	302	3e-178	622
Unigene11656_A	tetur09g00560	91.28	172	14	1	30	201	2426	2256	3e-55	214
Unigene11657_A	tetur09g00560	91.28	172	14	1	30	201	2426	2256	2e-55	214
Unigene11659_A	tetur14g02560	100	93	0	0	123	215	168	76	5e-46	184
Unigene1165_A	tetur01g02810	97.67	215	5	0	1	215	215	1	2e-107	387
Unigene11660_A	tetur07g06690	98.83	1799	21	0	284	2082	501	2299	0	3400
Unigene11661_A	tetur13g00280	97.41	1466	32	1	19	1478	125	1590	0	2607
Unigene11662_A	tetur04g08070	97.19	1140	32	0	10	1149	1140	1	0	2006
Unigene11663_A	tetur11g05370	99.16	359	3	0	2	360	359	1	0	688
Unigene11664_A	tetur12g02870	98.2	1111	20	0	1	1111	2464	1354	0	2044
Unigene11665_A	tetur10g04900	98.83	1373	16	0	1	1373	1373	1	0	2595
Unigene11666_A	tetur02g04760	99.66	886	3	0	168	1053	2127	1242	0	1733
Unigene11667_A	tetur02g11210	98.53	477	7	0	1	477	1171	1647	0	890
Unigene11668_A	tetur11g04120	98.96	192	2	0	158	349	7	198	7e-101	365
Unigene11669_A	tetur11g04120	98.96	192	2	0	154	345	7	198	7e-101	365
Unigene1166_A	tetur10g04320	100	93	0	0	2	94	232	324	9e-47	184
Unigene11670_A	tetur15g04107	96.39	83	3	0	25	107	1	83	3e-33	141
Unigene11671_A	tetur13g01920	98.76	3549	44	0	1	3549	7620	11168	0	6686
Unigene11673_A	tetur139g00060	94.39	214	12	0	1	214	403	190	2e-90	329
Unigene11674_A	tetur03g10103	91.85	135	11	0	52	186	1	135	2e-45	180
Unigene11675_A	tetur26g02780	98.34	662	11	0	42	703	2196	1535	0	1225
Unigene11676_A	tetur24g00090	99.15	1419	12	0	174	1592	1	1419	0	2718
Unigene11677_A	tetur24g00090	99.15	1419	12	0	172	1590	1	1419	0	2718
Unigene11678_A	tetur23g02452	99.03	724	7	0	307	1030	4035	3312	0	1380
Unigene11679_A	tetur01g05160	98.74	712	9	0	1	712	712	1	0	1340
Unigene1167_A	tetur12g00110	98.82	339	4	0	238	576	1	339	0	640
Unigene11680_A	tetur39g00630	98.39	1304	21	0	1	1304	1491	188	0	2418
Unigene11681_A	tetur03g05020	96.43	56	2	0	390	445	1688	1743	1e-19	95.6
Unigene11683_A	tetur02g02160	99.14	116	1	0	80	195	425	310	7e-58	222
Unigene11684_A	tetur01g08800	99.15	473	4	0	243	715	557	1029	0	906
Unigene11686_A	tetur07g03740	100	150	0	0	695	844	1	150	6e-80	297
Unigene11687_A	tetur22g00750	98.48	1443	22	0	108	1550	1443	1	0	2686
Unigene11688_A	tetur02g10870	91.67	48	4	0	150	197	971	924	8e-10	63.9
Unigene11689_A	tetur01g08410	96.67	180	6	0	374	553	1196	1017	6e-84	309
Unigene1168_A	tetur06g05710	97.13	348	10	0	1	348	1084	1431	7e-175	611
Unigene11690_A	tetur02g10640	97.49	1472	37	0	61	1532	1758	287	0	2625
Unigene11691_A	tetur07g06580	98.23	226	4	0	1	226	226	1	2e-116	416
Unigene11692_A	tetur06g04180	99.52	628	3	0	1	628	1109	1736	0	1221
Unigene11693_A	tetur03g09270	100	54	0	0	269	322	99	46	3e-23	107
Unigene11694_A	tetur353g00010	90.14	71	7	0	109	179	380	310	6e-17	85.7
Unigene11695_A	tetur19g01630	98.59	498	7	0	1734	2231	498	1	0	932
Unigene11696_A	tetur15g01010	97.5	1837	46	0	194	2030	1845	9	0	3277
Unigene11697_A	tetur15g01010	97.53	1618	40	0	55	1672	1626	9	0	2890
Unigene11698_A	tetur15g01010	97.1	1242	36	0	129	1370	1250	9	0	2177
Unigene11699_A	tetur15g03020	99.71	691	2	0	1	691	691	1	0	1354
Unigene1169_A	tetur24g01350	99.07	321	3	0	199	519	426	106	3e-175	613
Unigene116_A	tetur06g04400	98.89	721	8	0	1	721	215	935	0	1366
Unigene11700_A	tetur01g06040	90.48	42	4	0	242	283	285	244	1e-06	52
Unigene11701_A	tetur37g00470	98.4	624	10	0	188	811	1	624	0	1158
Unigene11702_A	tetur37g00470	98.4	624	10	0	164	787	1	624	0	1158
Unigene11703_A	tetur07g03550	98.28	814	14	0	3	816	1293	480	0	1503
Unigene11704_A	tetur01g07080	98.67	375	5	0	325	699	375	1	0	704
Unigene11705_A	tetur01g00300	98.47	1110	17	0	938	2047	1110	1	0	2066
Unigene11706_A	tetur01g00290	98.75	562	7	0	278	839	562	1	0	1059
Unigene11707_A	tetur01g12190	98.84	777	9	0	96	872	777	1	0	1469
Unigene11708_A	tetur25g00790	97.14	315	6	1	300	614	225	536	4e-156	549
Unigene11709_A	tetur25g00790	98.14	539	7	1	18	556	1	536	0	985
Unigene1170_A	tetur16g00240	98.84	517	6	0	1	517	922	406	0	977
Unigene11710_A	tetur20g01990	98.13	1071	17	1	49	1116	1083	13	0	1961
Unigene11711_A	tetur10g02800	91.67	132	11	0	135	266	1	132	1e-43	174
Unigene11712_A	tetur01g13770	99.24	1059	8	0	147	1205	1059	1	0	2036
Unigene11713_A	tetur04g09180	98.19	1326	24	0	191	1516	1326	1	0	2438
Unigene11714_A	tetur29g00920	99.28	414	3	0	1	414	414	1	0	797
Unigene11715_A	tetur33g00440	98.18	714	10	1	99	812	1	711	0	1308
Unigene11718_A	tetur04g00370	98.97	390	4	0	22	411	1965	1576	0	741
Unigene11719_A	tetur07g02990	97.62	504	12	0	25	528	1	504	0	904
Unigene1171_A	tetur18g01610	99.34	755	5	0	1	755	608	1362	0	1457
Unigene11720_A	tetur07g02990	98.1	420	8	0	107	526	85	504	0	769
Unigene11721_A	tetur01g08990	99.7	337	1	0	4	340	414	78	0	660
Unigene11722_A	tetur15g01740	98.29	585	10	0	292	876	1	585	0	1080
Unigene11723_A	tetur04g08090	98.35	547	9	0	131	677	1	547	0	1013
Unigene11724_A	tetur24g02220	99.25	798	6	0	171	968	1	798	0	1534
Unigene11725_A	tetur20g01090	100	517	0	0	1	517	415	931	0	1025
Unigene11726_A	tetur06g03650	98.65	816	11	0	127	942	1	816	0	1530
Unigene11727_A	tetur02g03590	100	83	0	0	175	257	83	1	3e-40	165
Unigene11728_A	tetur04g06220	98.37	429	7	0	172	600	429	1	0	795
Unigene11729_A	tetur02g08410	99.11	789	7	0	63	851	1	789	0	1509
Unigene11730_A	tetur03g09720	97.13	732	9	1	90	809	1	732	0	1298
Unigene11731_A	tetur08g07100	99.35	308	2	0	781	1088	1	308	1e-169	595
Unigene11732_A	tetur43g00230	99.02	614	6	0	1	614	614	1	0	1170
Unigene11733_A	tetur12g00440	98.67	677	9	0	290	966	1375	699	0	1271
Unigene11734_A	tetur13g00380	99.13	1961	17	0	754	2714	2342	382	0	3753
Unigene11737_A	tetur11g01940	97.97	1330	27	0	8	1337	111	1440	0	2422
Unigene11739_A	tetur01g16060	98.4	499	8	0	775	1273	231	729	0	926
Unigene11740_A	tetur08g01730	98.81	1603	19	0	102	1704	2967	1365	0	3027
Unigene11741_A	tetur08g01720	99.63	269	1	0	2	270	332	64	1e-148	525
Unigene11742_A	tetur43g00460	98.77	1297	16	0	2	1298	3278	1982	0	2444
Unigene11743_A	tetur08g05200	98.8	2675	32	0	1	2675	758	3432	0	5049
Unigene11744_A	tetur11g02170	99.43	1236	7	0	101	1336	1	1236	0	2395
Unigene11745_A	tetur29g00470	98.76	1050	13	0	182	1231	1050	1	0	1978
Unigene11746_A	tetur09g06600	98.94	754	8	0	90	843	1200	447	0	1431
Unigene11748_A	tetur01g14140	98.15	162	3	0	97	258	162	1	2e-80	297
Unigene11749_A	tetur24g01780	100	187	0	0	171	357	1	187	1e-102	371
Unigene1174_A	tetur33g01070	99.04	622	3	1	1	619	638	17	0	1181
Unigene11750_A	tetur03g08890	99.68	634	2	0	158	791	1	634	0	1241
Unigene11751_A	tetur03g01810	98.01	752	15	0	3	754	1112	1863	0	1372
Unigene11752_A	tetur43g00520	97.9	1572	33	0	1	1572	2346	775	0	2855
Unigene11753_A	tetur22g01540	98.81	420	5	0	11	430	987	568	0	793
Unigene11755_A	tetur37g00200	98.37	3507	36	1	101	3586	1	3507	0	6532
Unigene11756_A	tetur03g01840	97.83	276	6	0	1	276	346	621	2e-141	500
Unigene11757_A	tetur24g00820	94.19	258	15	0	103	360	1597	1340	3e-109	392
Unigene11758_A	tetur02g05640	99.01	507	5	0	95	601	516	10	0	965
Unigene11759_A	tetur30g00640	98	1052	20	1	1	1051	1052	1	0	1911
Unigene11760_A	tetur30g00640	97.12	555	15	1	410	963	555	1	0	965
Unigene11761_A	tetur22g00950	99.65	282	1	0	1	282	103	384	1e-156	551
Unigene11762_A	tetur03g08680	99.59	1210	5	0	40	1249	2629	1420	0	2359
Unigene11763_A	tetur04g08020	99.11	899	8	0	5	903	1059	161	0	1719
Unigene11764_A	tetur17g03660	96.46	706	25	0	381	1086	36	741	0	1201
Unigene11765_A	tetur09g01910	96.99	631	19	0	1	631	2701	2071	0	1100
Unigene11766_A	tetur07g06790	98.44	384	6	0	591	974	384	1	0	714
Unigene11767_A	tetur04g06510	98.56	1527	16	1	56	1576	1527	1	0	2855
Unigene11769_A	tetur03g08680	98.57	1403	17	1	3	1405	1400	1	0	2619
Unigene11770_A	tetur06g01910	97.23	613	17	0	156	768	1	613	0	1080
Unigene11771_A	tetur07g00180	98.67	750	10	0	362	1111	750	1	0	1407
Unigene11772_A	tetur01g08770	99.29	987	7	0	1	987	1360	2346	0	1901
Unigene11773_A	tetur05g09020	98.63	949	13	0	90	1038	1	949	0	1778
Unigene11774_A	tetur17g00190	98.86	788	9	0	1	788	788	1	0	1491
Unigene11776_A	tetur02g02460	98.47	1500	23	0	32	1531	1500	1	0	2791
Unigene11777_A	tetur02g02460	99.34	151	1	0	32	182	1500	1350	6e-79	291
Unigene11778_A	tetur03g02020	98.4	376	6	0	371	746	1	376	0	698
Unigene11779_A	tetur15g00300	96.19	105	4	0	312	416	1749	1645	4e-44	176
Unigene1177_A	tetur30g02230	95.92	49	2	0	1	49	1289	1337	1e-15	81.8
Unigene11780_A	tetur09g02160	99.09	2299	15	1	1	2293	48	2346	0	4393
Unigene11781_A	tetur06g00700	99.51	811	4	0	1	811	2088	1278	0	1576
Unigene11782_A	tetur15g01720	99.2	623	5	0	1	623	623	1	0	1195
Unigene11783_A	tetur09g06600	98.92	464	5	0	1	464	464	1	0	880
Unigene11784_A	tetur13g00330	99.37	633	4	0	1	633	1458	826	0	1223
Unigene11785_A	tetur37g00970	98.43	254	4	0	590	843	885	632	1e-132	472
Unigene11786_A	tetur37g00970	98.32	179	3	0	506	684	810	632	2e-90	331
Unigene11787_A	tetur11g05690	98.89	903	10	0	181	1083	903	1	0	1711
Unigene11788_A	tetur06g01200	93.02	43	3	0	392	434	50	8	4e-09	61.9
Unigene1178_A	tetur07g06110	97.74	708	16	0	1	708	2791	3498	0	1277
Unigene11790_A	tetur07g04010	97.98	1140	23	0	120	1259	1	1140	0	2077
Unigene11791_A	tetur27g01060	97.66	256	6	0	1	256	528	783	2e-129	460
Unigene11792_A	tetur29g00130	98.52	2298	34	0	37	2334	1	2298	0	4286
Unigene11793_A	tetur01g05520	98.12	160	3	0	20	179	174	15	4e-79	293
Unigene11794_A	tetur14g02390	93.44	305	20	0	817	1121	1338	1642	8e-125	446
Unigene11795_A	tetur264g00020	97.24	398	11	0	666	1063	1	398	0	702
Unigene11796_A	tetur15g01990	98.16	217	4	0	1	217	4494	4278	3e-111	398
Unigene11797_A	tetur07g01120	99.16	1076	9	0	60	1135	1092	17	0	2062
Unigene11798_A	tetur33g00390	98.48	329	1	1	1	325	1209	881	7e-175	611
Unigene11799_A	tetur22g00020	96.82	912	29	0	132	1043	1	912	0	1578
Unigene1179_A	tetur13g02250	98.55	825	12	0	267	1091	1	825	0	1540
Unigene117_A	tetur25g00400	95.79	214	8	1	1	213	4424	4211	4e-95	345
Unigene11801_A	tetur27g02400	99.59	489	2	0	1	489	1482	1970	0	954
Unigene11803_A	tetur03g10053	98.72	78	1	0	1	78	208	285	2e-35	147
Unigene11804_A	tetur17g01720	98.35	486	8	0	184	669	486	1	0	900
Unigene11805_A	tetur07g04560	97.77	852	19	0	1	852	852	1	0	1538
Unigene11807_A	tetur04g05780	90.65	845	70	1	7	851	959	124	0	1057
Unigene11808_A	tetur04g05780	90.65	845	70	1	7	851	959	124	0	1057
Unigene11809_A	tetur28g00030	98.75	319	4	0	523	841	744	426	2e-171	601
Unigene1180_A	tetur07g00780	98.8	1330	16	0	1	1330	1330	1	0	2510
Unigene11810_A	tetur13g01620	99.77	438	1	0	127	564	69	506	0	860
Unigene11812_A	tetur18g00410	98.42	1900	24	2	1	1900	1894	1	0	3521
Unigene11813_A	tetur01g13580	95.67	693	30	0	4	696	819	127	0	1136
Unigene11814_A	tetur25g01640	97.81	2461	54	0	1	2461	4780	2320	0	4450
Unigene11815_A	tetur16g01030	98.19	772	14	0	54	825	1	772	0	1419
Unigene11816_A	tetur10g01850	97.98	2084	42	0	215	2298	2553	470	0	3798
Unigene11817_A	tetur01g07700	98.33	777	10	1	100	876	1014	241	0	1433
Unigene11818_A	tetur10g04760	98.36	304	5	0	103	406	1148	845	2e-160	563
Unigene11819_A	tetur10g04810	95.36	194	9	0	103	296	1142	949	2e-85	313
Unigene1181_A	tetur04g07130	99.1	1787	16	0	1	1787	6669	4883	0	3416
Unigene11821_A	tetur17g00920	98.56	971	14	0	607	1577	1	971	0	1814
Unigene11822_A	tetur01g16794	99.26	940	7	0	1	940	1903	964	0	1808
Unigene11824_A	tetur02g09340	99.31	437	3	0	5	441	3404	2968	0	842
Unigene11825_A	tetur19g02930	99.09	1537	14	0	82	1618	1545	9	0	2936
Unigene11826_A	tetur36g00370	99.8	494	1	0	1	494	1035	1528	0	971
[truncated: 17,257 more rows]
