# Supplementary material for: Analysis of Insecticide Resistance-Related Genes of the Carmine Spider Mite Tetranychus cinnabarinus Based on a De Novo Assembled Transcriptome
Source: PLoS One. 2014 May 15;9(5):e94779. doi: 10.1371/journal.pone.0094779 (PMC4022505; doi:10.1371/journal.pone.0094779)
Supplement: Table S9 — Predicted insecticide resistance-related nAChRs transcripts. Length: sequences length of the unigene. Identity: seqeunce identity of the alignment to the T. urticae protein. Tu ID: ID of T. urticae (Tu) genome. (XLSX) [file pone.0094779.s009.xlsx]

## Sheet: Sheet1
Table S9 Predicted insecticide resistance-related nAChRs transcripts
Length: sequences length of the unigene
Identity: seqeunce identity of the alignment to theT. urticae protein
Tu ID: ID of T. urticae (Tu) genome
UnigeneID	Length	TU ID	Identity	E_value	TU Gene Name	the number of distint gene	Note
Unigene20967_A	1431	tetur01g10770	96.44	0	neuronal acetylcholine receptor subunit alpha-2 precursor	1
Unigene1138_A	900	tetur04g07390	85	5e-143	nicotinic acetylcholine receptor subunit alpha 6 transcript variant 1	2
Unigene16483_A	720	tetur05g08720	99.58	1e-141	muscarinic acetylcholine receptor M3	3
Unigene15230_A	465	tetur08g07630	98.06	4e-83	AcetylCholine Receptor family member	4
Unigene21625_A	489	tetur09g00750	98.77	2e-91	nicotinic acetylcholine receptor subunit alpha 2	5
Unigene25235_A	285		96.84	6e-50
Unigene7139_A	285		100	2e-50
Unigene1477_A	807	tetur09g00760	97.77	2e-152	nicotinic acetylcholine receptor alpha 3 subunit	6
Unigene1849_A	228		100	3e-40
Unigene6672_A	264		100	2e-48
Unigene23477_A	270	tetur09g00790	100	8e-47	acetylcholine receptor protein alpha 1, 2, 3, 4 invertebrate	7
Unigene8019_A	306		100	4e-58
Unigene25025_A	306		99.02	1e-57
Unigene14230_A	306	tetur09g00800	100	2e-57	nicotinic acetylcholine receptor beta 1 subunit	8
Unigene21348_A	651		95.85	2e-126
Unigene21376_A	282		100	1e-48
Unigene1870_A	255	tetur27g02250	100	5e-44	nicotinic acetylcholine receptor subunit alpha 6 transcript variant 1	9
Unigene24384_A	213		98.59	5e-36
